# Supplementary material for: Bacterial communities 16S rDNA fingerprinting as a potential tracing tool for cultured seabass Dicentrarchus labrax
Source: PubMed Central journal article supplement (PMC5605529; doi:10.1038/s41598-017-11552-y), 2017-09-19
Supplement: 41598_2017_11552_MOESM1_ESM.pdf [file 41598_2017_11552_MOESM1_ESM.pdf]

**Potential use of bacterial communities fingerprint to trace the geographic origin of cultured seabass *Dicentrarchus labrax***

Tânia Pimentel<sup>1\*</sup>, Joana Marcelino<sup>2</sup>, Fernando Ricardo<sup>1</sup>, Amadeu M.V.M Soares<sup>1</sup> and Ricardo Calado<sup>1\*</sup>

<sup>1</sup>Departamento de Biologia & CESAM, Universidade de Aveiro, Campus Universitário de Santiago, 3810-193 Aveiro, Portugal

<sup>2</sup>Instituto Universitário de Lisboa (ISCTE-IUL), DINÂMIA'CET, Avenida das Forças Armadas, 1649-026 Lisbon, Portugal

Corresponding authors:

\* Tânia Pimentel (trpimentel@ua.pt)

\* Ricardo Calado (rjcalado@hotmail.com)

**Supplementary Table S1.** Results of Kruskal-Wallis test and pairwise comparisons using Nemenyi test for bacterial communities (DGGE Band) among three semi-intensive fish farms: Farm A, Farm B and Farm C. Asterisks (\*) highlight significant differences ( $p \leq 0,05$ ).

| DGGE Band | Kruskal-Wallis test |               | Post Hoc Nemenyi test       |                             |                             |
|-----------|---------------------|---------------|-----------------------------|-----------------------------|-----------------------------|
|           | Chi-Square (df=2)   | p-value       | Farm A vs Farm B<br>p-value | Farm A vs Farm C<br>p-value | Farm B vs Farm C<br>p-value |
| 1         | 8,112               | <b>0,017*</b> | <b>0,039*</b>               | <b>0,041*</b>               | 0,994                       |
| 2         | 0,943               | 0,624         | -                           | -                           | -                           |
| 3         | 2,693               | 0,260         | -                           | -                           | -                           |
| 4         | 4,286               | 0,117         | -                           | -                           | -                           |
| 5         | 7,020               | <b>0,030*</b> | 0,800                       | 0,136                       | <b>0,029*</b>               |
| 6         | 0,781               | 0,677         | -                           | -                           | -                           |
| 7         | 2,000               | 0,368         | -                           | -                           | -                           |
| 8         | 2,756               | 0,252         | -                           | -                           | -                           |
| 9         | 5,749               | 0,056         | -                           | -                           | -                           |
| 10        | 2,660               | 0,265         | -                           | -                           | -                           |
| 11        | 9,882               | <b>0,007*</b> | 1,000                       | <b>0,046*</b>               | 0,086                       |
| 12        | 7,578               | <b>0,023*</b> | <b>0,053*</b>               | 0,890                       | 0,193                       |
| 13        | 13,291              | <b>0,001*</b> | 1,000                       | <b>0,022*</b>               | <b>0,022*</b>               |
| 14        | 11,022              | <b>0,004*</b> | <b>0,005*</b>               | 0,495                       | 0,117                       |
| 15        | 2,000               | 0,368         | -                           | -                           | -                           |
| 16        | 11,594              | <b>0,003*</b> | <b>0,003*</b>               | 0,371                       | 0,117                       |
| 17        | 2,602               | 0,272         | -                           | -                           | -                           |
| 18        | 9,882               | <b>0,007*</b> | 1,000                       | 0,086                       | <b>0,036*</b>               |
| 19        | 12,465              | <b>0,002*</b> | 0,157                       | <b>0,002*</b>               | 0,235                       |
| 20        | 10,261              | <b>0,006*</b> | 0,874                       | <b>0,010*</b>               | <b>0,043*</b>               |
| 21        | 9,380               | <b>0,009*</b> | <b>0,007*</b>               | 0,157                       | 0,452                       |
| 22        | 3,140               | 0,208         | -                           | -                           | -                           |
| 23        | 1,086               | 0,581         | -                           | -                           | -                           |
| 24        | 0,787               | 0,675         | -                           | -                           | -                           |
| 25        | 8,207               | <b>0,017*</b> | <b>0,024*</b>               | 0,933                       | 0,061                       |
| 26        | 3,963               | 0,138         | -                           | -                           | -                           |
| 27        | 1,570               | 0,455         | -                           | -                           | -                           |
| 28        | 4,022               | 0,134         | -                           | -                           | -                           |
| 29        | 9,125               | <b>0,010*</b> | <b>0,008*</b>               | 0,136                       | 0,539                       |
| 30        | 5,139               | 0,077         | -                           | -                           | -                           |
| 31        | 9,448               | <b>0,009*</b> | <b>0,020*</b>               | <b>0,024*</b>               | 0,997                       |
| 32        | 8,732               | <b>0,013*</b> | <b>0,010*</b>               | 0,270                       | 0,370                       |
| 33        | 1,089               | 0,580         | -                           | -                           | -                           |
| 34        | 5,139               | 0,077         | -                           | -                           | -                           |
| 35        | 0,020               | 0,990         | -                           | -                           | -                           |
| 36        | 7,317               | <b>0,026*</b> | <b>0,024*</b>               | 0,452                       | 0,333                       |
| 37        | 5,040               | 0,080         | -                           | -                           | -                           |
| 38        | 5,829               | 0,056         | -                           | -                           | -                           |
| 39        | 1,689               | 0,430         | -                           | -                           | -                           |
| 40        | 3,648               | 0,161         | -                           | -                           | -                           |
| 41        | 9,551               | <b>0,008*</b> | <b>0,020*</b>               | <b>0,024*</b>               | 0,997                       |
| 42        | 3,339               | 0,188         | -                           | -                           | -                           |
| 43        | 1,219               | 0,544         | -                           | -                           | -                           |
| 44        | 2,022               | 0,364         | -                           | -                           | -                           |
| 45        | 1,563               | 0,458         | -                           | -                           | -                           |
| 46        | 4,286               | 0,117         | -                           | -                           | -                           |
| 47        | 7,280               | <b>0,026*</b> | <b>0,020*</b>               | 0,270                       | 0,490                       |
| 48        | 4,286               | 0,117         | -                           | -                           | -                           |
| 49        | 5,780               | 0,056         | -                           | -                           | -                           |
| 50        | 2,000               | 0,368         | -                           | -                           | -                           |
| 51        | 1,079               | 0,583         | -                           | -                           | -                           |
| 52        | 0,943               | 0,624         | -                           | -                           | -                           |
| 53        | 7,356               | <b>0,025*</b> | 0,997                       | 0,073                       | <b>0,051*</b>               |
| 54        | 8,301               | <b>0,016*</b> | <b>0,051*</b>               | 0,920                       | 0,146                       |
| 55        | 1,049               | 0,592         | -                           | -                           | -                           |

|    |       |               |               |               |       |
|----|-------|---------------|---------------|---------------|-------|
| 56 | 9,727 | <b>0,008*</b> | <b>0,020*</b> | <b>0,024*</b> | 0,997 |
| 57 | 4,615 | 0,100         | -             | -             | -     |
| 58 | 8,112 | <b>0,017*</b> | 0,051         | <b>0,039*</b> | 0,994 |
| 59 | 2,602 | 0,272         | -             | -             | -     |
| 60 | 3,722 | 0,156         | -             | -             | -     |
| 61 | 2,000 | 0,368         | -             | -             | -     |
| 62 | 2,600 | 0,272         | -             | -             | -     |
| 63 | 7,006 | <b>0,030*</b> | 0,411         | <b>0,039*</b> | 0,473 |
| 64 | 2,299 | 0,317         | -             | -             | -     |

---

**Supplementary Table S2.** Absolute abundance and taxonomic assignment of bacterial quality-filtered OTUs.

| OTU ID | Samples |        |        | Taxonomy<br>(Kingdom, Phylum, Class, Order, Family, Genus)                                      |
|--------|---------|--------|--------|-------------------------------------------------------------------------------------------------|
|        | Farm A  | Farm B | Farm C |                                                                                                 |
| 1      | 3211    | 788    | 1340   | Bacteria;Proteobacteria;Gammaproteobacteria;Pseudomonadales;Pseudomonadaceae;Pseudomonas;       |
| 2      | 237     | 10     | 168    | Bacteria;Proteobacteria;Gammaproteobacteria;Enterobacteriales;Enterobacteriaceae;Serratia;      |
| 3      | 362     | 35     | 0      | Bacteria;Proteobacteria;Gammaproteobacteria;Pseudomonadales;Moraxellaceae;Perlucidibaca;        |
| 4      | 0       | 70     | 27     | Bacteria;Proteobacteria;Epsilonproteobacteria;Campylobacterales;Helicobacteraceae;Sulfurovum;   |
| 5      | 1       | 89     | 0      | Bacteria;Bacteroidetes;unclassified;unclassified;unclassified;unclassified;                     |
| 6      | 4       | 5      | 67     | Bacteria;Proteobacteria;Alphaproteobacteria;Rhodobacterales;Rhodobacteraceae;unclassified;      |
| 7      | 44      | 11     | 21     | Bacteria;Proteobacteria;Alphaproteobacteria;Rhodobacterales;Rhodobacteraceae;unclassified;      |
| 8      | 28      | 18     | 18     | Bacteria;Proteobacteria;Alphaproteobacteria;Rhodobacterales;Rhodobacteraceae;unclassified;      |
| 9      | 25      | 24     | 12     | Bacteria;Proteobacteria;Alphaproteobacteria;Rhodobacterales;Rhodobacteraceae;Loktanelia;        |
| 10     | 40      | 4      | 13     | Bacteria;Fusobacteria;Fusobacteria;Fusobacteriales;Fusobacteriaceae;unclassified;               |
| 11     | 0       | 56     | 0      | Bacteria;Fusobacteria;Fusobacteria;Fusobacteriales;Fusobacteriaceae;unclassified;               |
| 12     | 3       | 33     | 11     | Bacteria;Proteobacteria;Deltaproteobacteria;Desulfuromonadales;unclassified;unclassified;       |
| 13     | 1       | 36     | 6      | Bacteria;Firmicutes;Clostridia;Clostridiales;Ruminococcaceae;unclassified;                      |
| 14     | 0       | 39     | 3      | Bacteria;Proteobacteria;Epsilonproteobacteria;Campylobacterales;Campylobacteraceae;Arcobacter;  |
| 15     | 1       | 29     | 11     | Bacteria;Proteobacteria;Gammaproteobacteria;unclassified;unclassified;unclassified;             |
| 16     | 0       | 19     | 13     | Bacteria;Firmicutes;Clostridia;Clostridiales;unclassified;unclassified;                         |
| 17     | 3       | 18     | 9      | Bacteria;Proteobacteria;Alphaproteobacteria;Rhodobacterales;Rhodobacteraceae;Sulfitobacter;     |
| 18     | 0       | 23     | 5      | Bacteria;Proteobacteria;Epsilonproteobacteria;Campylobacterales;unclassified;unclassified;      |
| 19     | 1       | 25     | 1      | Bacteria;unclassified;unclassified;unclassified;unclassified;unclassified;                      |
| 20     | 0       | 17     | 9      | Bacteria;Proteobacteria;Alphaproteobacteria;Rhodobacterales;Rhodobacteraceae;unclassified;      |
| 21     | 12      | 1      | 13     | Bacteria;Bacteroidetes;Flavobacteria;Flavobacteriales;Flavobacteriaceae;unclassified;           |
| 22     | 0       | 8      | 18     | Bacteria;Proteobacteria;Epsilonproteobacteria;Campylobacterales;unclassified;unclassified;      |
| 23     | 0       | 16     | 8      | Bacteria;Proteobacteria;Alphaproteobacteria;Rhizobiales;unclassified;unclassified;              |
| 24     | 6       | 3      | 15     | Bacteria;Proteobacteria;Gammaproteobacteria;Vibrionales;Vibrionaceae;Vibrio;                    |
| 25     | 0       | 17     | 6      | Bacteria;Proteobacteria;Alphaproteobacteria;Rhizobiales;Rhodobiaceae;unclassified;              |
| 26     | 0       | 21     | 2      | Bacteria;Bacteroidetes;unclassified;unclassified;unclassified;unclassified;                     |
| 27     | 0       | 23     | 0      | Bacteria;Firmicutes;Clostridia;Clostridiales;unclassified;unclassified;                         |
| 28     | 0       | 4      | 17     | Bacteria;Proteobacteria;Alphaproteobacteria;Rhodobacterales;Rhodobacteraceae;unclassified;      |
| 29     | 0       | 14     | 7      | Bacteria;Proteobacteria;Gammaproteobacteria;unclassified;unclassified;unclassified;             |
| 30     | 0       | 10     | 10     | Bacteria;Proteobacteria;Gammaproteobacteria;unclassified;unclassified;unclassified;             |
| 31     | 0       | 20     | 0      | Bacteria;Bacteroidetes;unclassified;unclassified;unclassified;unclassified;                     |
| 32     | 0       | 5      | 14     | Bacteria;Proteobacteria;Epsilonproteobacteria;Campylobacterales;Campylobacteraceae;Arcobacter;  |
| 33     | 0       | 19     | 0      | Bacteria;Proteobacteria;Deltaproteobacteria;Desulfobacteriales;Desulfobacteraceae;unclassified; |
| 34     | 0       | 16     | 3      | Bacteria;Bacteroidetes;unclassified;unclassified;unclassified;unclassified;                     |
| 35     | 19      | 0      | 0      | Bacteria;Firmicutes;Bacilli;Bacillales;Bacillaceae_1;Bacillus;                                  |
| 36     | 0       | 8      | 10     | Bacteria;Proteobacteria;Alphaproteobacteria;Sphingomonadales;Erythrobacteraceae;unclassified;   |
| 37     | 16      | 1      | 1      | Bacteria;Proteobacteria;Betaproteobacteria;unclassified;unclassified;unclassified;              |

|    |    |    |    |                                                                                                 |
|----|----|----|----|-------------------------------------------------------------------------------------------------|
| 38 | 1  | 9  | 8  | Bacteria;Proteobacteria;Gammaproteobacteria;unclassified;unclassified;unclassified;             |
| 39 | 18 | 0  | 0  | Bacteria;Proteobacteria;Gammaproteobacteria;Vibrionales;Vibrionaceae;Photobacterium;            |
| 40 | 9  | 5  | 3  | Bacteria;Proteobacteria;Alphaproteobacteria;Rhodobacterales;Rhodobacteraceae;unclassified;      |
| 41 | 4  | 2  | 11 | Bacteria;Proteobacteria;Gammaproteobacteria;unclassified;unclassified;unclassified;             |
| 42 | 5  | 5  | 6  | Bacteria;Proteobacteria;Gammaproteobacteria;unclassified;unclassified;unclassified;             |
| 43 | 1  | 11 | 4  | Bacteria;Actinobacteria;Actinobacteria;unclassified;unclassified;unclassified;                  |
| 44 | 0  | 8  | 8  | Bacteria;Proteobacteria;Epsilonproteobacteria;Campylobacterales;Helicobacteraceae;Sulfurimonas; |
| 45 | 0  | 10 | 6  | Bacteria;Proteobacteria;Gammaproteobacteria;unclassified;unclassified;unclassified;             |
| 46 | 3  | 12 | 0  | Bacteria;Proteobacteria;Gammaproteobacteria;unclassified;unclassified;unclassified;             |
| 47 | 15 | 0  | 0  | Bacteria;Fusobacteria;Fusobacteria;Fusobacteriales;Fusobacteriaceae;Cetobacterium;              |
| 48 | 1  | 13 | 0  | Bacteria;Bacteroidetes;unclassified;unclassified;unclassified;unclassified;                     |
| 49 | 0  | 0  | 14 | Bacteria;Proteobacteria;unclassified;unclassified;unclassified;unclassified;                    |
| 50 | 0  | 8  | 6  | Bacteria;Firmicutes;Bacilli;Bacillales;Planococcaceae;Planococcus;                              |
| 51 | 0  | 14 | 0  | Bacteria;Bacteroidetes;unclassified;unclassified;unclassified;unclassified;                     |
| 52 | 0  | 9  | 5  | Bacteria;Proteobacteria;Gammaproteobacteria;unclassified;unclassified;unclassified;             |
| 53 | 3  | 6  | 4  | Bacteria;Bacteroidetes;Flavobacteria;Flavobacteriales;Flavobacteriaceae;unclassified;           |
| 54 | 0  | 3  | 10 | Bacteria;Proteobacteria;Alphaproteobacteria;Sphingomonadales;Erythrobacteraceae;unclassified;   |
| 55 | 0  | 0  | 13 | Bacteria;Proteobacteria;Gammaproteobacteria;Alteromonadales;unclassified;unclassified;          |
| 56 | 0  | 6  | 7  | Bacteria;Firmicutes;Clostridia;Clostridiales;Lachnospiraceae;unclassified;                      |
| 57 | 0  | 6  | 6  | Bacteria;Proteobacteria;Gammaproteobacteria;unclassified;unclassified;unclassified;             |
| 58 | 12 | 0  | 0  | Bacteria;Proteobacteria;Gammaproteobacteria;Pseudomonadales;Pseudomonadaceae;Pseudomonas;       |
| 59 | 1  | 11 | 0  | Bacteria;Bacteroidetes;unclassified;unclassified;unclassified;unclassified;                     |
| 60 | 2  | 4  | 6  | Bacteria;Proteobacteria;Alphaproteobacteria;Sneathiellales;Sneathiellaceae;Sneathiella;         |
| 61 | 7  | 5  | 0  | Bacteria;Proteobacteria;unclassified;unclassified;unclassified;unclassified;                    |
| 62 | 1  | 7  | 4  | Bacteria;Proteobacteria;Deltaproteobacteria;Desulfobacterales;unclassified;unclassified;        |
| 63 | 1  | 10 | 0  | Bacteria;Proteobacteria;Deltaproteobacteria;unclassified;unclassified;unclassified;             |
| 64 | 8  | 2  | 1  | Bacteria;Actinobacteria;Actinobacteria;Actinomycetales;Microbacteriaceae;Agrococcus;            |
| 65 | 0  | 0  | 11 | Bacteria;Proteobacteria;Gammaproteobacteria;Alteromonadales;Colwelliaceae;Colwellia;            |
| 66 | 0  | 10 | 1  | Bacteria;Bacteroidetes;Sphingobacteria;Sphingobacteriales;Flammeovirgaceae;unclassified;        |
| 67 | 10 | 1  | 0  | Bacteria;Proteobacteria;Betaproteobacteria;Burkholderiales;Comamonadaceae;Hydrogenophaga;       |
| 68 | 1  | 6  | 4  | Bacteria;Actinobacteria;Actinobacteria;Acidimicrobiales;Acidimicrobiaceae;Ilumatobacter;        |
| 69 | 0  | 11 | 0  | Bacteria;Firmicutes;unclassified;unclassified;unclassified;unclassified;                        |
| 70 | 0  | 6  | 5  | Bacteria;Bacteroidetes;unclassified;unclassified;unclassified;unclassified;                     |
| 71 | 0  | 3  | 7  | Bacteria;Proteobacteria;Alphaproteobacteria;Rhodobacterales;Rhodobacteraceae;unclassified;      |
| 72 | 0  | 8  | 2  | Bacteria;Proteobacteria;Gammaproteobacteria;unclassified;unclassified;unclassified;             |
| 73 | 0  | 10 | 0  | Bacteria;Proteobacteria;Epsilonproteobacteria;Campylobacterales;Campylobacteraceae;Arcobacter;  |
| 74 | 0  | 10 | 0  | Bacteria;Firmicutes;Clostridia;Clostridiales;unclassified;unclassified;                         |
| 75 | 0  | 2  | 8  | Bacteria;Proteobacteria;Epsilonproteobacteria;Campylobacterales;Helicobacteraceae;Sulfurimonas; |
| 76 | 0  | 0  | 10 | Bacteria;Proteobacteria;Alphaproteobacteria;unclassified;unclassified;unclassified;             |
| 77 | 0  | 8  | 2  | Bacteria;Firmicutes;Clostridia;Clostridiales;Lachnospiraceae;unclassified;                      |
| 78 | 0  | 10 | 0  | Bacteria;Bacteroidetes;unclassified;unclassified;unclassified;unclassified;                     |
| 79 | 0  | 10 | 0  | Bacteria;Proteobacteria;Epsilonproteobacteria;Campylobacterales;unclassified;unclassified;      |

|     |   |   |   |                                                                                                   |
|-----|---|---|---|---------------------------------------------------------------------------------------------------|
| 80  | 0 | 7 | 2 | Bacteria;Proteobacteria;Gammaproteobacteria;Chromatiales;Chromatiaceae;unclassified;              |
| 81  | 4 | 2 | 3 | Bacteria;Proteobacteria;Alphaproteobacteria;Rhodobacterales;Rhodobacteraceae;Paracoccus;          |
| 82  | 0 | 0 | 9 | Bacteria;Proteobacteria;Gammaproteobacteria;Alteromonadales;Colwelliaceae;Colwellia;              |
| 83  | 0 | 9 | 0 | Bacteria;Proteobacteria;Alphaproteobacteria;unclassified;unclassified;unclassified;               |
| 84  | 0 | 1 | 8 | Bacteria;Firmicutes;Clostridia;Clostridiales;Lachnospiraceae;unclassified;                        |
| 85  | 9 | 0 | 0 | Bacteria;Proteobacteria;Betaproteobacteria;Burkholderiales;Oxalobacteraceae;unclassified;         |
| 86  | 0 | 9 | 0 | Bacteria;unclassified;unclassified;unclassified;unclassified;unclassified;                        |
| 87  | 0 | 1 | 8 | Bacteria;Proteobacteria;Alphaproteobacteria;Rhizobiales;unclassified;unclassified;                |
| 88  | 0 | 6 | 2 | Bacteria;Proteobacteria;Gammaproteobacteria;Chromatiales;unclassified;unclassified;               |
| 89  | 0 | 8 | 0 | Bacteria;Proteobacteria;Alphaproteobacteria;Rhodobacterales;Rhodobacteraceae;Jannaschia;          |
| 90  | 0 | 5 | 3 | Bacteria;Proteobacteria;Gammaproteobacteria;unclassified;unclassified;unclassified;               |
| 91  | 0 | 4 | 4 | Bacteria;Acidobacteria;Acidobacteria;Acidobacteriales;Acidobacteriaceae;Gp23                      |
| 92  | 0 | 8 | 0 | Bacteria;Proteobacteria;Deltaproteobacteria;Desulfobacterales;Desulfobacteraceae;unclassified;    |
| 93  | 8 | 0 | 0 | Bacteria;Proteobacteria;Betaproteobacteria;Methylophilales;Methylophilaceae;unclassified;         |
| 94  | 0 | 8 | 0 | Bacteria;Proteobacteria;Epsilonproteobacteria;Campylobacterales;unclassified;unclassified;        |
| 95  | 0 | 8 | 0 | Bacteria;Bacteroidetes;unclassified;unclassified;unclassified;unclassified;                       |
| 96  | 0 | 6 | 2 | Bacteria;Proteobacteria;Alphaproteobacteria;Rhodobacterales;Rhodobacteraceae;unclassified;        |
| 97  | 7 | 0 | 1 | Bacteria;Proteobacteria;Gammaproteobacteria;Alteromonadales;Alteromonadaceae;unclassified;        |
| 98  | 0 | 8 | 0 | Bacteria;Bacteroidetes;unclassified;unclassified;unclassified;unclassified;                       |
| 99  | 8 | 0 | 0 | Bacteria;Proteobacteria;Gammaproteobacteria;Pseudomonadales;Pseudomonadaceae;Pseudomonas;         |
| 100 | 6 | 1 | 0 | Bacteria;Proteobacteria;Betaproteobacteria;unclassified;unclassified;unclassified;                |
| 101 | 0 | 4 | 3 | Bacteria;Proteobacteria;Gammaproteobacteria;unclassified;unclassified;unclassified;               |
| 102 | 0 | 1 | 6 | Bacteria;Proteobacteria;Alphaproteobacteria;Sphingomonadales;Erythrobacteraceae;unclassified;     |
| 103 | 6 | 1 | 0 | Bacteria;Proteobacteria;Alphaproteobacteria;Rhodobacterales;Rhodobacteraceae;unclassified;        |
| 104 | 0 | 4 | 3 | Bacteria;unclassified;unclassified;unclassified;unclassified;unclassified;                        |
| 105 | 0 | 4 | 3 | Bacteria;Proteobacteria;Alphaproteobacteria;Rhodobacterales;Rhodobacteraceae;unclassified;        |
| 106 | 4 | 3 | 0 | Bacteria;Proteobacteria;Gammaproteobacteria;Pseudomonadales;Moraxellaceae;Psychrobacter;          |
| 107 | 0 | 6 | 1 | Bacteria;Bacteroidetes;unclassified;unclassified;unclassified;unclassified;                       |
| 108 | 1 | 1 | 5 | Bacteria;Proteobacteria;Alphaproteobacteria;Rhodobacterales;Rhodobacteraceae;unclassified;        |
| 109 | 0 | 0 | 7 | Bacteria;unclassified;unclassified;unclassified;unclassified;unclassified;                        |
| 110 | 0 | 7 | 0 | Bacteria;Bacteroidetes;unclassified;unclassified;unclassified;unclassified;                       |
| 111 | 0 | 0 | 7 | Bacteria;Bacteroidetes;unclassified;unclassified;unclassified;unclassified;                       |
| 112 | 0 | 7 | 0 | Bacteria;Proteobacteria;Deltaproteobacteria;Desulfobacterales;Desulfobacteraceae;unclassified;    |
| 113 | 0 | 4 | 3 | Bacteria;Proteobacteria;Gammaproteobacteria;unclassified;unclassified;unclassified;               |
| 114 | 0 | 6 | 0 | Bacteria;Proteobacteria;Alphaproteobacteria;Rhizobiales;Phyllobacteriaceae;unclassified;          |
| 115 | 2 | 2 | 2 | Bacteria;Proteobacteria;Alphaproteobacteria;Rhodospirillales;Rhodospirillaceae;unclassified;      |
| 116 | 1 | 4 | 1 | Bacteria;Proteobacteria;unclassified;unclassified;unclassified;unclassified;                      |
| 117 | 2 | 0 | 4 | Bacteria;Proteobacteria;Gammaproteobacteria;unclassified;unclassified;unclassified;               |
| 118 | 0 | 6 | 0 | Bacteria;Proteobacteria;Deltaproteobacteria;Desulfovibrionales;Desulfovibrionaceae;Desulfovibrio; |
| 119 | 0 | 6 | 0 | Bacteria;Firmicutes;Clostridia;Clostridiales;unclassified;unclassified;                           |
| 120 | 0 | 5 | 1 | Bacteria;Bacteroidetes;unclassified;unclassified;unclassified;unclassified;                       |
| 121 | 2 | 4 | 0 | Bacteria;Proteobacteria;Alphaproteobacteria;Rhodobacterales;Rhodobacteraceae;Sulfitobacter;       |

|     |   |   |   |                                                                                                      |
|-----|---|---|---|------------------------------------------------------------------------------------------------------|
| 122 | 0 | 6 | 0 | Bacteria;Bacteroidetes;unclassified;unclassified;unclassified;unclassified;                          |
| 123 | 0 | 2 | 4 | Bacteria;Proteobacteria;Deltaproteobacteria;Desulfovibrionales;Desulfovibrionaceae;Desulfovibrio;    |
| 124 | 0 | 1 | 5 | Bacteria;Proteobacteria;Epsilonproteobacteria;Campylobacterales;Campylobacteraceae;unclassified;     |
| 125 | 0 | 5 | 1 | Bacteria;Proteobacteria;Alphaproteobacteria;Rhodobacterales;Rhodobacteraceae;unclassified;           |
| 126 | 0 | 5 | 1 | Bacteria;Proteobacteria;Deltaproteobacteria;Desulfobacterales;Desulfobacteraceae;unclassified;       |
| 127 | 6 | 0 | 0 | Bacteria;Proteobacteria;Betaproteobacteria;Burkholderiales;Comamonadaceae;Polaromonas;               |
| 128 | 0 | 0 | 6 | Bacteria;Proteobacteria;Deltaproteobacteria;Myxococcales;unclassified;unclassified;                  |
| 129 | 0 | 1 | 5 | Bacteria;Bacteroidetes;Flavobacteria;Flavobacteriales;Flavobacteriaceae;Polaribacter;                |
| 130 | 0 | 1 | 5 | Bacteria;Proteobacteria;Alphaproteobacteria;Rhodobacterales;Rhodobacteraceae;unclassified;           |
| 131 | 0 | 3 | 3 | Bacteria;Spirochaetes;Spirochaetes;Spirochaetales;Spirochaetaceae;Spirochaeta;                       |
| 132 | 0 | 3 | 3 | Bacteria;Proteobacteria;Epsilonproteobacteria;Campylobacterales;Campylobacteraceae;Arcobacter;       |
| 133 | 1 | 1 | 4 | Bacteria;Proteobacteria;Alphaproteobacteria;Rhodobacterales;Rhodobacteraceae;unclassified;           |
| 134 | 0 | 5 | 0 | Bacteria;Acidobacteria;Acidobacteria;Acidobacteriales;Acidobacteriaceae;Gp23                         |
| 135 | 0 | 2 | 3 | Bacteria;Proteobacteria;Gammaproteobacteria;unclassified;unclassified;unclassified;                  |
| 136 | 1 | 2 | 2 | Bacteria;Proteobacteria;Alphaproteobacteria;Rhodobacterales;Rhodobacteraceae;unclassified;           |
| 137 | 0 | 5 | 0 | Bacteria;Proteobacteria;Alphaproteobacteria;Rhodobacterales;Rhodobacteraceae;unclassified;           |
| 138 | 1 | 3 | 1 | Bacteria;Proteobacteria;Deltaproteobacteria;Desulfobacterales;Desulfobulbaceae;unclassified;         |
| 139 | 2 | 1 | 2 | Bacteria;Proteobacteria;Alphaproteobacteria;Rhodobacterales;Rhodobacteraceae;unclassified;           |
| 140 | 0 | 4 | 1 | Bacteria;Actinobacteria;Actinobacteria;unclassified;unclassified;unclassified;                       |
| 141 | 0 | 5 | 0 | Bacteria;Bacteroidetes;unclassified;unclassified;unclassified;unclassified;                          |
| 142 | 0 | 3 | 2 | Bacteria;unclassified;unclassified;unclassified;unclassified;unclassified;                           |
| 143 | 1 | 2 | 2 | Bacteria;Proteobacteria;Alphaproteobacteria;Sphingomonadales;Sphingomonadaceae;unclassified;         |
| 144 | 0 | 4 | 1 | Bacteria;Proteobacteria;Alphaproteobacteria;unclassified;unclassified;unclassified;                  |
| 145 | 0 | 4 | 1 | Bacteria;Proteobacteria;Alphaproteobacteria;Rhizobiales;Rhodobiaceae;Andersenella;                   |
| 146 | 0 | 2 | 3 | Bacteria;Proteobacteria;Alphaproteobacteria;Rhodobacterales;Rhodobacteraceae;unclassified;           |
| 147 | 0 | 0 | 5 | Bacteria;Bacteroidetes;unclassified;unclassified;unclassified;unclassified;                          |
| 148 | 0 | 5 | 0 | Bacteria;unclassified;unclassified;unclassified;unclassified;unclassified;                           |
| 149 | 0 | 4 | 1 | Bacteria;unclassified;unclassified;unclassified;unclassified;unclassified;                           |
| 150 | 5 | 0 | 0 | Bacteria;unclassified;unclassified;unclassified;unclassified;unclassified;                           |
| 151 | 0 | 5 | 0 | Bacteria;Firmicutes;unclassified;unclassified;unclassified;unclassified;                             |
| 152 | 0 | 2 | 3 | Bacteria;Bacteroidetes;Flavobacteria;Flavobacteriales;Flavobacteriaceae;Krokinobacter;               |
| 153 | 0 | 3 | 2 | Bacteria;Proteobacteria;Alphaproteobacteria;Rhodobacterales;Rhodobacteraceae;unclassified;           |
| 154 | 0 | 5 | 0 | Bacteria;unclassified;unclassified;unclassified;unclassified;unclassified;                           |
| 155 | 0 | 5 | 0 | Bacteria;Bacteroidetes;unclassified;unclassified;unclassified;unclassified;                          |
| 156 | 0 | 3 | 2 | Bacteria;Bacteroidetes;Sphingobacteria;Sphingobacteriales;unclassified;unclassified;                 |
| 157 | 0 | 3 | 2 | Bacteria;Proteobacteria;Epsilonproteobacteria;Campylobacterales;Campylobacteraceae;Sulfurospirillum; |
| 158 | 0 | 5 | 0 | Bacteria;Bacteroidetes;unclassified;unclassified;unclassified;unclassified;                          |
| 159 | 0 | 4 | 1 | Bacteria;Bacteroidetes;unclassified;unclassified;unclassified;unclassified;                          |
| 160 | 0 | 5 | 0 | Bacteria;unclassified;unclassified;unclassified;unclassified;unclassified;                           |
| 161 | 0 | 5 | 0 | Bacteria;Proteobacteria;Epsilonproteobacteria;Campylobacterales;unclassified;unclassified;           |
| 162 | 0 | 0 | 5 | Bacteria;Proteobacteria;Gammaproteobacteria;Alteromonadales;unclassified;unclassified;               |
| 163 | 0 | 5 | 0 | Bacteria;Bacteroidetes;unclassified;unclassified;unclassified;unclassified;                          |

|     |   |   |   |                                                                                                    |
|-----|---|---|---|----------------------------------------------------------------------------------------------------|
| 164 | 0 | 4 | 1 | Bacteria;Bacteroidetes;unclassified;unclassified;unclassified;unclassified;                        |
| 165 | 0 | 0 | 4 | Bacteria;Acidobacteria;Acidobacteria;Acidobacteriales;Acidobacteriaceae;Gp23                       |
| 166 | 0 | 4 | 0 | Bacteria;Proteobacteria;Deltaproteobacteria;Desulfobacterales;Desulfobacteraceae;unclassified;     |
| 167 | 0 | 4 | 0 | Bacteria;Proteobacteria;Alphaproteobacteria;Rhodobacterales;Rhodobacteraceae;unclassified;         |
| 168 | 0 | 2 | 2 | Bacteria;Proteobacteria;Alphaproteobacteria;Rhodobacterales;Rhodobacteraceae;Rhodovulum;           |
| 169 | 0 | 3 | 1 | Bacteria;Acidobacteria;Acidobacteria;Acidobacteriales;Acidobacteriaceae;Gp10                       |
| 170 | 1 | 2 | 1 | Bacteria;Bacteroidetes;unclassified;unclassified;unclassified;unclassified;                        |
| 171 | 0 | 1 | 3 | Bacteria;Proteobacteria;Deltaproteobacteria;unclassified;unclassified;unclassified;                |
| 172 | 0 | 2 | 2 | Bacteria;Firmicutes;Clostridia;Clostridiales;Lachnospiraceae;unclassified;                         |
| 173 | 0 | 4 | 0 | Bacteria;unclassified;unclassified;unclassified;unclassified;unclassified;                         |
| 174 | 0 | 2 | 2 | Bacteria;Proteobacteria;Alphaproteobacteria;unclassified;unclassified;unclassified;                |
| 175 | 0 | 0 | 4 | Bacteria;Proteobacteria;Epsilonproteobacteria;Campylobacterales;unclassified;unclassified;         |
| 176 | 0 | 1 | 3 | Bacteria;Proteobacteria;Gammaproteobacteria;Alteromonadales;Psychromonadaceae;Psychromonas;        |
| 177 | 3 | 1 | 0 | Bacteria;Bacteroidetes;Flavobacteria;Flavobacteriales;Flavobacteriaceae;unclassified;              |
| 178 | 0 | 4 | 0 | Bacteria;Proteobacteria;Deltaproteobacteria;unclassified;unclassified;unclassified;                |
| 179 | 0 | 4 | 0 | Bacteria;Bacteroidetes;unclassified;unclassified;unclassified;unclassified;                        |
| 180 | 1 | 0 | 3 | Bacteria;Proteobacteria;Epsilonproteobacteria;Campylobacterales;Campylobacteraceae;Arcobacter;     |
| 181 | 0 | 4 | 0 | Bacteria;Proteobacteria;Deltaproteobacteria;Desulfuromonadales;Desulfuromonadaceae;Desulfuromonas; |
| 182 | 0 | 4 | 0 | Bacteria;Bacteroidetes;unclassified;unclassified;unclassified;unclassified;                        |
| 183 | 0 | 1 | 3 | Bacteria;Proteobacteria;Alphaproteobacteria;Rhodobacterales;Rhodobacteraceae;Octadecabacter;       |
| 184 | 0 | 4 | 0 | Bacteria;Bacteroidetes;unclassified;unclassified;unclassified;unclassified;                        |
| 185 | 0 | 0 | 4 | Bacteria;Proteobacteria;Alphaproteobacteria;unclassified;unclassified;unclassified;                |
| 186 | 0 | 4 | 0 | Bacteria;Bacteroidetes;unclassified;unclassified;unclassified;unclassified;                        |
| 187 | 0 | 0 | 4 | Bacteria;Proteobacteria;Gammaproteobacteria;Vibrionales;Vibrionaceae;unclassified;                 |
| 188 | 0 | 3 | 1 | Bacteria;Proteobacteria;Gammaproteobacteria;Chromatiales;unclassified;unclassified;                |
| 189 | 0 | 4 | 0 | Bacteria;Bacteroidetes;unclassified;unclassified;unclassified;unclassified;                        |
| 190 | 0 | 4 | 0 | Bacteria;Proteobacteria;Gammaproteobacteria;unclassified;unclassified;unclassified;                |
| 191 | 2 | 2 | 0 | Bacteria;Bacteroidetes;unclassified;unclassified;unclassified;unclassified;                        |
| 192 | 4 | 0 | 0 | Bacteria;Proteobacteria;Gammaproteobacteria;Vibrionales;Vibrionaceae;Photobacterium;               |
| 193 | 0 | 3 | 1 | Bacteria;Bacteroidetes;Sphingobacteria;Sphingobacteriales;unclassified;unclassified;               |
| 194 | 0 | 4 | 0 | Bacteria;Firmicutes;Clostridia;Clostridiales;unclassified;unclassified;                            |
| 195 | 2 | 2 | 0 | Bacteria;Proteobacteria;Deltaproteobacteria;Desulfuromonadales;Desulfuromonadaceae;unclassified;   |
| 196 | 0 | 4 | 0 | Bacteria;Bacteroidetes;unclassified;unclassified;unclassified;unclassified;                        |
| 197 | 1 | 1 | 2 | Bacteria;Proteobacteria;Alphaproteobacteria;Sphingomonadales;Erythrobacteraceae;unclassified;      |
| 198 | 1 | 3 | 0 | Bacteria;Bacteroidetes;unclassified;unclassified;unclassified;unclassified;                        |
| 199 | 0 | 4 | 0 | Bacteria;Proteobacteria;Deltaproteobacteria;Bdellovibrionales;Bacteriovoracaceae;unclassified;     |
| 200 | 4 | 0 | 0 | Bacteria;Bacteroidetes;Flavobacteria;Flavobacteriales;Flavobacteriaceae;Chryseobacterium;          |
| 201 | 0 | 4 | 0 | Bacteria;Proteobacteria;Epsilonproteobacteria;Campylobacterales;Campylobacteraceae;unclassified;   |
| 202 | 1 | 3 | 0 | Bacteria;Firmicutes;Bacilli;Bacillales;Bacillales_Incertae_Sedis_XII;Exiguobacterium;              |
| 203 | 0 | 4 | 0 | Bacteria;unclassified;unclassified;unclassified;unclassified;unclassified;                         |
| 204 | 1 | 0 | 3 | Bacteria;Proteobacteria;Alphaproteobacteria;Caulobacterales;Hyphomonadaceae;Litorimonas;           |
| 205 | 0 | 4 | 0 | Bacteria;Proteobacteria;Alphaproteobacteria;Rhodobacterales;Rhodobacteraceae;unclassified;         |



|     |   |   |   |                                                                                                 |
|-----|---|---|---|-------------------------------------------------------------------------------------------------|
| 206 | 1 | 2 | 1 | Bacteria;Proteobacteria;Betaproteobacteria;unclassified;unclassified;unclassified;              |
| 207 | 0 | 2 | 2 | Bacteria;Proteobacteria;Gammaproteobacteria;unclassified;unclassified;unclassified;             |
| 208 | 4 | 0 | 0 | Bacteria;Proteobacteria;Betaproteobacteria;Burkholderiales;Comamonadaceae;unclassified;         |
| 209 | 0 | 0 | 4 | Bacteria;Firmicutes;Bacilli;Bacillales;Planococcaceae;Planomicrobium;                           |
| 210 | 3 | 0 | 1 | Bacteria;Bacteroidetes;Bacteroidia;Bacteroidales;unclassified;unclassified;                     |
| 211 | 0 | 1 | 3 | Bacteria;unclassified;unclassified;unclassified;unclassified;unclassified;                      |
| 212 | 0 | 2 | 2 | Bacteria;Proteobacteria;Alphaproteobacteria;Rhodobacterales;Rhodobacteraceae;unclassified;      |
| 213 | 0 | 3 | 1 | Bacteria;Proteobacteria;Gammaproteobacteria;Alteromonadales;Alteromonadaceae;Alteromonas;       |
| 214 | 0 | 3 | 0 | Bacteria;Proteobacteria;Deltaproteobacteria;Myxococcales;unclassified;unclassified;             |
| 215 | 0 | 3 | 0 | Bacteria;Proteobacteria;Alphaproteobacteria;Rhodobacterales;Rhodobacteraceae;Sulfitobacter;     |
| 216 | 0 | 3 | 0 | Bacteria;unclassified;unclassified;unclassified;unclassified;unclassified;                      |
| 217 | 0 | 3 | 0 | Bacteria;Proteobacteria;Gammaproteobacteria;Chromatiales;Chromatiaceae;unclassified;            |
| 218 | 0 | 2 | 1 | Bacteria;Proteobacteria;Alphaproteobacteria;Rhizobiales;Hyphomicrobiaceae;unclassified;         |
| 219 | 0 | 1 | 2 | Bacteria;Proteobacteria;Deltaproteobacteria;unclassified;unclassified;unclassified;             |
| 220 | 0 | 0 | 3 | Bacteria;Firmicutes;Bacilli;Lactobacillales;Streptococcaceae;Streptococcus;                     |
| 221 | 0 | 0 | 3 | Bacteria;Proteobacteria;Gammaproteobacteria;Vibrionales;Vibrionaceae;unclassified;              |
| 222 | 0 | 0 | 3 | Bacteria;Bacteroidetes;unclassified;unclassified;unclassified;unclassified;                     |
| 223 | 0 | 3 | 0 | Bacteria;Proteobacteria;Deltaproteobacteria;Desulfobacterales;Desulfobacteraceae;Desulfobacter; |
| 224 | 1 | 0 | 2 | Bacteria;Proteobacteria;Alphaproteobacteria;Rhodobacterales;Rhodobacteraceae;Ruegeria;          |
| 225 | 0 | 3 | 0 | Bacteria;Proteobacteria;Alphaproteobacteria;Rhodobacterales;Rhodobacteraceae;unclassified;      |
| 226 | 1 | 2 | 0 | Bacteria;Bacteroidetes;unclassified;unclassified;unclassified;unclassified;                     |
| 227 | 3 | 0 | 0 | Bacteria;Proteobacteria;Alphaproteobacteria;Sphingomonadales;Sphingomonadaceae;Sphingomonas;    |
| 228 | 0 | 2 | 1 | Bacteria;Bacteroidetes;Flavobacteria;Flavobacteriales;Flavobacteriaceae;unclassified;           |
| 229 | 0 | 0 | 3 | Bacteria;Proteobacteria;Gammaproteobacteria;unclassified;unclassified;unclassified;             |
| 230 | 3 | 0 | 0 | Bacteria;Bacteroidetes;unclassified;unclassified;unclassified;unclassified;                     |
| 231 | 0 | 3 | 0 | Bacteria;Proteobacteria;Deltaproteobacteria;Desulfobacterales;Desulfobacteraceae;Desulfobacula; |
| 232 | 0 | 3 | 0 | Bacteria;Bacteroidetes;unclassified;unclassified;unclassified;unclassified;                     |
| 233 | 3 | 0 | 0 | Bacteria;Proteobacteria;Gammaproteobacteria;unclassified;unclassified;unclassified;             |
| 234 | 0 | 0 | 3 | Bacteria;Proteobacteria;Deltaproteobacteria;Desulfobacterales;Desulfobacteraceae;unclassified;  |
| 235 | 0 | 1 | 2 | Bacteria;Proteobacteria;Gammaproteobacteria;unclassified;unclassified;unclassified;             |
| 236 | 0 | 3 | 0 | Bacteria;Proteobacteria;Deltaproteobacteria;Desulfobacterales;Desulfobacteraceae;unclassified;  |
| 237 | 0 | 2 | 1 | Bacteria;Firmicutes;Clostridia;Clostridiales;unclassified;unclassified;                         |
| 238 | 3 | 0 | 0 | Bacteria;Proteobacteria;Gammaproteobacteria;unclassified;unclassified;unclassified;             |
| 239 | 0 | 2 | 1 | Bacteria;Proteobacteria;Gammaproteobacteria;unclassified;unclassified;unclassified;             |
| 240 | 0 | 1 | 2 | Bacteria;Proteobacteria;Gammaproteobacteria;unclassified;unclassified;unclassified;             |
| 241 | 0 | 0 | 3 | Bacteria;Proteobacteria;Gammaproteobacteria;unclassified;unclassified;unclassified;             |
| 242 | 0 | 2 | 1 | Bacteria;Bacteroidetes;unclassified;unclassified;unclassified;unclassified;                     |
| 243 | 2 | 1 | 0 | Bacteria;Bacteroidetes;Flavobacteria;Flavobacteriales;Cryomorphaceae;unclassified;              |
| 244 | 0 | 3 | 0 | Bacteria;Bacteroidetes;Flavobacteria;Flavobacteriales;Flavobacteriaceae;unclassified;           |
| 245 | 0 | 0 | 3 | Bacteria;Proteobacteria;Deltaproteobacteria;Desulfobacterales;Desulfobulbaceae;unclassified;    |
| 246 | 0 | 3 | 0 | Bacteria;Proteobacteria;Betaproteobacteria;unclassified;unclassified;unclassified;              |
| 247 | 0 | 0 | 3 | Bacteria;Firmicutes;Clostridia;unclassified;unclassified;unclassified;                          |

|     |   |   |   |                                                                                                    |
|-----|---|---|---|----------------------------------------------------------------------------------------------------|
| 248 | 0 | 3 | 0 | Bacteria;Proteobacteria;Deltaproteobacteria;Myxococcales;unclassified;unclassified;                |
| 249 | 0 | 3 | 0 | Bacteria;Proteobacteria;Deltaproteobacteria;Desulfobacterales;Desulfobacteraceae;unclassified;     |
| 250 | 0 | 1 | 2 | Bacteria;Bacteroidetes;Sphingobacteria;Sphingobacteriales;unclassified;unclassified;               |
| 251 | 0 | 0 | 3 | Bacteria;Proteobacteria;Gammaproteobacteria;Pseudomonadales;Moraxellaceae;Psychrobacter;           |
| 252 | 0 | 3 | 0 | Bacteria;Bacteroidetes;unclassified;unclassified;unclassified;unclassified;                        |
| 253 | 0 | 3 | 0 | Bacteria;Bacteroidetes;unclassified;unclassified;unclassified;unclassified;                        |
| 254 | 0 | 3 | 0 | Bacteria;Bacteroidetes;unclassified;unclassified;unclassified;unclassified;                        |
| 255 | 0 | 3 | 0 | Bacteria;Bacteroidetes;Flavobacteria;Flavobacteriales;unclassified;unclassified;                   |
| 256 | 0 | 0 | 3 | Bacteria;Bacteroidetes;unclassified;unclassified;unclassified;unclassified;                        |
| 257 | 0 | 0 | 3 | Bacteria;Proteobacteria;Alphaproteobacteria;Rhodobacterales;Rhodobacteraceae;unclassified;         |
| 258 | 0 | 3 | 0 | Bacteria;Proteobacteria;Gammaproteobacteria;Chromatiales;Chromatiaceae;unclassified;               |
| 259 | 0 | 3 | 0 | Bacteria;Proteobacteria;Deltaproteobacteria;Desulfuromonadales;unclassified;unclassified;          |
| 260 | 0 | 0 | 3 | Bacteria;Proteobacteria;Gammaproteobacteria;Alteromonadales;Colwelliaceae;Thalassomonas;           |
| 261 | 0 | 2 | 1 | Bacteria;Bacteroidetes;Sphingobacteria;Sphingobacteriales;unclassified;unclassified;               |
| 262 | 0 | 3 | 0 | Bacteria;Firmicutes;Clostridia;Clostridiales;Lachnospiraceae;unclassified;                         |
| 263 | 0 | 0 | 3 | Bacteria;Proteobacteria;Gammaproteobacteria;unclassified;unclassified;unclassified;                |
| 264 | 0 | 0 | 3 | Bacteria;unclassified;unclassified;unclassified;unclassified;unclassified;                         |
| 265 | 0 | 3 | 0 | Bacteria;Firmicutes;Clostridia;Clostridiales;Ruminococcaceae;unclassified;                         |
| 266 | 0 | 3 | 0 | Bacteria;unclassified;unclassified;unclassified;unclassified;unclassified;                         |
| 267 | 0 | 3 | 0 | Bacteria;Proteobacteria;Deltaproteobacteria;Desulfobacterales;Desulfobacteraceae;Desulfobacter;    |
| 268 | 0 | 3 | 0 | Bacteria;unclassified;unclassified;unclassified;unclassified;unclassified;                         |
| 269 | 0 | 2 | 1 | Bacteria;Proteobacteria;Epsilonproteobacteria;Campylobacterales;Campylobacteraceae;Arcobacter;     |
| 270 | 0 | 1 | 2 | Bacteria;Proteobacteria;Alphaproteobacteria;unclassified;unclassified;unclassified;                |
| 271 | 0 | 0 | 3 | Bacteria;Firmicutes;Clostridia;Clostridiales;unclassified;unclassified;                            |
| 272 | 0 | 3 | 0 | Bacteria;Bacteroidetes;unclassified;unclassified;unclassified;unclassified;                        |
| 273 | 3 | 0 | 0 | Bacteria;Proteobacteria;Gammaproteobacteria;Pseudomonadales;Moraxellaceae;Psychrobacter;           |
| 274 | 0 | 3 | 0 | Bacteria;Proteobacteria;Deltaproteobacteria;Desulfuromonadales;Desulfuromonadaceae;Desulfuromonas; |
| 275 | 0 | 3 | 0 | Bacteria;unclassified;unclassified;unclassified;unclassified;unclassified;                         |
| 276 | 0 | 1 | 2 | Bacteria;Firmicutes;Clostridia;Clostridiales;Lachnospiraceae;unclassified;                         |
| 277 | 0 | 3 | 0 | Bacteria;unclassified;unclassified;unclassified;unclassified;unclassified;                         |
| 278 | 0 | 0 | 3 | Bacteria;Firmicutes;Bacilli;Bacillales;Paenibacillaceae_1;Paenibacillus;                           |
| 279 | 2 | 0 | 1 | Bacteria;Proteobacteria;Gammaproteobacteria;Alteromonadales;Alteromonadaceae;Agarivorans;          |
| 280 | 0 | 1 | 2 | Bacteria;Bacteroidetes;unclassified;unclassified;unclassified;unclassified;                        |
| 281 | 0 | 3 | 0 | Bacteria;Proteobacteria;Gammaproteobacteria;unclassified;unclassified;unclassified;                |
| 282 | 0 | 2 | 1 | Bacteria;Actinobacteria;Actinobacteria;Acidimicrobiales;Acidimicrobiaceae;Ilumatobacter;           |
| 283 | 0 | 0 | 3 | Bacteria;Proteobacteria;Gammaproteobacteria;unclassified;unclassified;unclassified;                |
| 284 | 0 | 2 | 1 | Bacteria;Proteobacteria;Gammaproteobacteria;unclassified;unclassified;unclassified;                |
| 285 | 0 | 1 | 2 | Bacteria;Bacteroidetes;Sphingobacteria;Sphingobacteriales;unclassified;unclassified;               |
| 286 | 0 | 2 | 1 | Bacteria;Proteobacteria;Gammaproteobacteria;unclassified;unclassified;unclassified;                |
| 287 | 0 | 2 | 1 | Bacteria;Proteobacteria;Deltaproteobacteria;Desulfuromonadales;unclassified;unclassified;          |
| 288 | 2 | 0 | 1 | Bacteria;Bacteroidetes;unclassified;unclassified;unclassified;unclassified;                        |
| 289 | 0 | 1 | 2 | Bacteria;Proteobacteria;Alphaproteobacteria;unclassified;unclassified;unclassified;                |

|     |   |   |   |                                                                                                    |
|-----|---|---|---|----------------------------------------------------------------------------------------------------|
| 290 | 0 | 2 | 0 | Bacteria;Proteobacteria;Alphaproteobacteria;Rhodobacterales;Rhodobacteraceae;unclassified;         |
| 291 | 0 | 0 | 2 | Bacteria;Proteobacteria;Gammaproteobacteria;Vibrionales;Vibrionaceae;Photobacterium;               |
| 292 | 0 | 1 | 1 | Bacteria;Proteobacteria;Alphaproteobacteria;Rhodobacterales;Rhodobacteraceae;unclassified;         |
| 293 | 0 | 0 | 2 | Bacteria;Proteobacteria;Gammaproteobacteria;Vibrionales;Vibrionaceae;Aliivibrio;                   |
| 294 | 0 | 1 | 1 | Bacteria;Actinobacteria;Actinobacteria;Acidimicrobiales;Acidimicrobiaceae;Ilumatobacter;           |
| 295 | 0 | 1 | 1 | Bacteria;Proteobacteria;Gammaproteobacteria;unclassified;unclassified;unclassified;                |
| 296 | 2 | 0 | 0 | Bacteria;Actinobacteria;Actinobacteria;Actinomycetales;Micrococcaceae;Kocuria;                     |
| 297 | 2 | 0 | 0 | Bacteria;Proteobacteria;Alphaproteobacteria;unclassified;unclassified;unclassified;                |
| 298 | 0 | 1 | 1 | Bacteria;Bacteroidetes;unclassified;unclassified;unclassified;unclassified;                        |
| 299 | 0 | 1 | 1 | Bacteria;Proteobacteria;Gammaproteobacteria;unclassified;unclassified;unclassified;                |
| 300 | 0 | 2 | 0 | Bacteria;Proteobacteria;Alphaproteobacteria;Rhodobacterales;Rhodobacteraceae;unclassified;         |
| 301 | 0 | 0 | 2 | Bacteria;unclassified;unclassified;unclassified;unclassified;unclassified;                         |
| 302 | 0 | 2 | 0 | Bacteria;Bacteroidetes;unclassified;unclassified;unclassified;unclassified;                        |
| 303 | 0 | 1 | 1 | Bacteria;Proteobacteria;Gammaproteobacteria;Chromatiales;unclassified;unclassified;                |
| 304 | 0 | 0 | 2 | Bacteria;Acidobacteria;Acidobacteria;Acidobacteriales;Acidobacteriaceae;Gp10                       |
| 305 | 0 | 2 | 0 | Bacteria;Proteobacteria;Alphaproteobacteria;Rhodobacterales;Rhodobacteraceae;unclassified;         |
| 306 | 0 | 0 | 2 | Bacteria;Proteobacteria;Alphaproteobacteria;Rhodobacterales;Rhodobacteraceae;unclassified;         |
| 307 | 0 | 0 | 2 | Bacteria;Proteobacteria;Gammaproteobacteria;unclassified;unclassified;unclassified;                |
| 308 | 0 | 0 | 2 | Bacteria;Proteobacteria;Deltaproteobacteria;Desulfobacterales;Desulfobacteraceae;unclassified;     |
| 309 | 0 | 2 | 0 | Bacteria;unclassified;unclassified;unclassified;unclassified;unclassified;                         |
| 310 | 0 | 2 | 0 | Bacteria;Proteobacteria;Gammaproteobacteria;unclassified;unclassified;unclassified;                |
| 311 | 0 | 0 | 2 | Bacteria;Proteobacteria;Deltaproteobacteria;Desulfobacterales;Desulfobacteraceae;unclassified;     |
| 312 | 0 | 1 | 1 | Bacteria;Proteobacteria;Alphaproteobacteria;Rhodobacterales;Rhodobacteraceae;unclassified;         |
| 313 | 0 | 2 | 0 | Bacteria;Proteobacteria;unclassified;unclassified;unclassified;unclassified;                       |
| 314 | 0 | 1 | 1 | Bacteria;Bacteroidetes;unclassified;unclassified;unclassified;unclassified;                        |
| 315 | 0 | 1 | 1 | Bacteria;Bacteroidetes;Flavobacteria;Flavobacteriales;Flavobacteriaceae;Maribacter;                |
| 316 | 0 | 0 | 2 | Bacteria;Proteobacteria;Alphaproteobacteria;unclassified;unclassified;unclassified;                |
| 317 | 0 | 2 | 0 | Bacteria;unclassified;unclassified;unclassified;unclassified;unclassified;                         |
| 318 | 0 | 2 | 0 | Bacteria;Proteobacteria;unclassified;unclassified;unclassified;unclassified;                       |
| 319 | 0 | 2 | 0 | Bacteria;Proteobacteria;unclassified;unclassified;unclassified;unclassified;                       |
| 320 | 0 | 0 | 2 | Bacteria;Bacteroidetes;unclassified;unclassified;unclassified;unclassified;                        |
| 321 | 0 | 0 | 2 | Bacteria;unclassified;unclassified;unclassified;unclassified;unclassified;                         |
| 322 | 0 | 2 | 0 | Bacteria;Proteobacteria;Deltaproteobacteria;Desulfobacterales;Desulfobulbaceae;unclassified;       |
| 323 | 0 | 0 | 2 | Bacteria;Proteobacteria;Deltaproteobacteria;Desulfuromonadales;Desulfuromonadaceae;Desulfuromonas; |
| 324 | 0 | 2 | 0 | Bacteria;Proteobacteria;Alphaproteobacteria;Sphingomonadales;unclassified;unclassified;            |
| 325 | 1 | 1 | 0 | Bacteria;Bacteroidetes;Sphingobacteria;Sphingobacteriales;unclassified;unclassified;               |
| 326 | 0 | 1 | 1 | Bacteria;Proteobacteria;Deltaproteobacteria;Desulfobacterales;Desulfobacteraceae;Desulfosarcina;   |
| 327 | 0 | 2 | 0 | Bacteria;Proteobacteria;Gammaproteobacteria;unclassified;unclassified;unclassified;                |
| 328 | 0 | 1 | 1 | Bacteria;Bacteroidetes;Sphingobacteria;Sphingobacteriales;unclassified;unclassified;               |
| 329 | 0 | 1 | 1 | Bacteria;Proteobacteria;Gammaproteobacteria;unclassified;unclassified;unclassified;                |
| 330 | 0 | 0 | 2 | Bacteria;unclassified;unclassified;unclassified;unclassified;unclassified;                         |
| 331 | 0 | 2 | 0 | Bacteria;Proteobacteria;Gammaproteobacteria;Oceanospirillales;Oceanospirillaceae;Oleispira;        |

|     |   |   |   |                                                                                                      |
|-----|---|---|---|------------------------------------------------------------------------------------------------------|
| 332 | 0 | 0 | 2 | Bacteria;Proteobacteria;Gammaproteobacteria;unclassified;unclassified;unclassified;                  |
| 333 | 0 | 1 | 1 | Bacteria;Acidobacteria;Acidobacteria;Acidobacteriales;Acidobacteriaceae;Gp26                         |
| 334 | 0 | 2 | 0 | Bacteria;Proteobacteria;Deltaproteobacteria;Desulfobacterales;Desulfobacteraceae;unclassified;       |
| 335 | 0 | 2 | 0 | Bacteria;Bacteroidetes;unclassified;unclassified;unclassified;unclassified;                          |
| 336 | 0 | 1 | 1 | Bacteria;unclassified;unclassified;unclassified;unclassified;unclassified;                           |
| 337 | 0 | 2 | 0 | Bacteria;Proteobacteria;Gammaproteobacteria;unclassified;unclassified;unclassified;                  |
| 338 | 0 | 2 | 0 | Bacteria;Proteobacteria;Deltaproteobacteria;Desulfobacterales;Desulfobacteraceae;Desulfobacter;      |
| 339 | 0 | 0 | 2 | Bacteria;Acidobacteria;unclassified;unclassified;unclassified;unclassified;                          |
| 340 | 0 | 1 | 1 | Bacteria;Bacteroidetes;Flavobacteria;Flavobacteriales;Flavobacteriaceae;unclassified;                |
| 341 | 0 | 0 | 2 | Bacteria;Firmicutes;unclassified;unclassified;unclassified;unclassified;                             |
| 342 | 0 | 0 | 2 | Bacteria;Proteobacteria;Alphaproteobacteria;Rhizobiales;unclassified;unclassified;                   |
| 343 | 0 | 2 | 0 | Bacteria;Proteobacteria;unclassified;unclassified;unclassified;unclassified;                         |
| 344 | 0 | 0 | 2 | Bacteria;Proteobacteria;Gammaproteobacteria;unclassified;unclassified;unclassified;                  |
| 345 | 0 | 2 | 0 | Bacteria;Proteobacteria;Alphaproteobacteria;unclassified;unclassified;unclassified;                  |
| 346 | 0 | 1 | 1 | Bacteria;unclassified;unclassified;unclassified;unclassified;unclassified;                           |
| 347 | 0 | 2 | 0 | Bacteria;Proteobacteria;Gammaproteobacteria;cellvibrionales;Halieaceae;Congregibacter;               |
| 348 | 0 | 1 | 1 | Bacteria;Bacteroidetes;Sphingobacteria;Sphingobacteriales;unclassified;unclassified;                 |
| 349 | 0 | 1 | 1 | Bacteria;Bacteroidetes;unclassified;unclassified;unclassified;unclassified;                          |
| 350 | 0 | 2 | 0 | Bacteria;Bacteroidetes;Flavobacteria;Flavobacteriales;Flavobacteriaceae;Salegentibacter;             |
| 351 | 0 | 2 | 0 | Bacteria;Bacteroidetes;unclassified;unclassified;unclassified;unclassified;                          |
| 352 | 0 | 2 | 0 | Bacteria;Firmicutes;Clostridia;Clostridiales;unclassified;unclassified;                              |
| 353 | 0 | 2 | 0 | Bacteria;Proteobacteria;Alphaproteobacteria;unclassified;unclassified;unclassified;                  |
| 354 | 0 | 2 | 0 | Bacteria;Bacteroidetes;unclassified;unclassified;unclassified;unclassified;                          |
| 355 | 0 | 2 | 0 | Bacteria;Bacteroidetes;Flavobacteria;Flavobacteriales;Flavobacteriaceae;unclassified;                |
| 356 | 0 | 0 | 2 | Bacteria;Bacteroidetes;unclassified;unclassified;unclassified;unclassified;                          |
| 357 | 0 | 1 | 1 | Bacteria;Bacteroidetes;Sphingobacteria;Sphingobacteriales;Flammeovirgaceae;unclassified;             |
| 358 | 0 | 2 | 0 | Bacteria;Proteobacteria;Gammaproteobacteria;Chromatiales;Chromatiaceae;unclassified;                 |
| 359 | 0 | 2 | 0 | Bacteria;Proteobacteria;Epsilonproteobacteria;Campylobacterales;Campylobacteraceae;Sulfurospirillum; |
| 360 | 0 | 1 | 1 | Bacteria;Proteobacteria;Deltaproteobacteria;Desulfobacterales;Desulfobulbaceae;unclassified;         |
| 361 | 0 | 2 | 0 | Bacteria;Bacteroidetes;unclassified;unclassified;unclassified;unclassified;                          |
| 362 | 0 | 0 | 2 | Bacteria;Bacteroidetes;unclassified;unclassified;unclassified;unclassified;                          |
| 363 | 0 | 0 | 2 | Bacteria;unclassified;unclassified;unclassified;unclassified;unclassified;                           |
| 364 | 0 | 1 | 1 | Bacteria;unclassified;unclassified;unclassified;unclassified;unclassified;                           |
| 365 | 0 | 0 | 2 | Bacteria;Proteobacteria;Alphaproteobacteria;Rhizobiales;unclassified;unclassified;                   |
| 366 | 0 | 2 | 0 | Bacteria;Proteobacteria;Deltaproteobacteria;Desulfuromonadales;Desulfuromonadaceae;unclassified;     |
| 367 | 0 | 0 | 2 | Bacteria;Proteobacteria;Gammaproteobacteria;unclassified;unclassified;unclassified;                  |
| 368 | 0 | 2 | 0 | Bacteria;Proteobacteria;Gammaproteobacteria;unclassified;unclassified;unclassified;                  |
| 369 | 0 | 0 | 2 | Bacteria;Bacteroidetes;unclassified;unclassified;unclassified;unclassified;                          |
| 370 | 0 | 2 | 0 | Bacteria;unclassified;unclassified;unclassified;unclassified;unclassified;                           |
| 371 | 0 | 2 | 0 | Bacteria;Proteobacteria;Alphaproteobacteria;Rhodobacterales;Rhodobacteraceae;unclassified;           |
| 372 | 0 | 2 | 0 | Bacteria;Bacteroidetes;Bacteroidia;Bacteroidales;unclassified;unclassified;                          |
| 373 | 0 | 2 | 0 | Bacteria;Acidobacteria;Acidobacteria;Acidobacteriales;Acidobacteriaceae;Gp23                         |

|     |   |   |   |                                                                                                |
|-----|---|---|---|------------------------------------------------------------------------------------------------|
| 374 | 0 | 2 | 0 | Bacteria;Bacteroidetes;unclassified;unclassified;unclassified;unclassified;                    |
| 375 | 0 | 2 | 0 | Bacteria;Bacteroidetes;unclassified;unclassified;unclassified;unclassified;                    |
| 376 | 0 | 2 | 0 | Bacteria;Bacteroidetes;unclassified;unclassified;unclassified;unclassified;                    |
| 377 | 0 | 2 | 0 | Bacteria;Proteobacteria;Gammaproteobacteria;unclassified;unclassified;unclassified;            |
| 378 | 0 | 2 | 0 | Bacteria;Firmicutes;unclassified;unclassified;unclassified;unclassified;                       |
| 379 | 0 | 2 | 0 | Bacteria;unclassified;unclassified;unclassified;unclassified;unclassified;                     |
| 380 | 0 | 2 | 0 | Bacteria;Proteobacteria;Deltaproteobacteria;Myxococcales;unclassified;unclassified;            |
| 381 | 0 | 0 | 2 | Bacteria;Actinobacteria;Actinobacteria;Actinomycetales;unclassified;unclassified;              |
| 382 | 0 | 2 | 0 | Bacteria;Bacteroidetes;unclassified;unclassified;unclassified;unclassified;                    |
| 383 | 0 | 1 | 1 | Bacteria;Actinobacteria;Actinobacteria;unclassified;unclassified;unclassified;                 |
| 384 | 0 | 1 | 1 | Bacteria;Proteobacteria;Alphaproteobacteria;Rhodobacterales;Rhodobacteraceae;unclassified;     |
| 385 | 0 | 2 | 0 | Bacteria;Proteobacteria;Deltaproteobacteria;Desulfobacterales;Desulfobacteraceae;unclassified; |
| 386 | 0 | 1 | 1 | Bacteria;Bacteroidetes;unclassified;unclassified;unclassified;unclassified;                    |
| 387 | 0 | 2 | 0 | Bacteria;Proteobacteria;Deltaproteobacteria;Desulfobacterales;Desulfobulbaceae;unclassified;   |
| 388 | 0 | 2 | 0 | Bacteria;Firmicutes;Clostridia;Clostridiales;Lachnospiraceae;unclassified;                     |
| 389 | 0 | 0 | 2 | Bacteria;Actinobacteria;Actinobacteria;unclassified;unclassified;unclassified;                 |
| 390 | 0 | 0 | 2 | Bacteria;Bacteroidetes;Sphingobacteria;Sphingobacteriales;unclassified;unclassified;           |
| 391 | 1 | 1 | 0 | Bacteria;Proteobacteria;Gammaproteobacteria;unclassified;unclassified;unclassified;            |
| 392 | 0 | 0 | 2 | Bacteria;Proteobacteria;Epsilonproteobacteria;Campylobacterales;unclassified;unclassified;     |
| 393 | 2 | 0 | 0 | Bacteria;Proteobacteria;Gammaproteobacteria;Pseudomonadales;Pseudomonadaceae;unclassified;     |
| 394 | 2 | 0 | 0 | Bacteria;Proteobacteria;Gammaproteobacteria;Pseudomonadales;Pseudomonadaceae;Pseudomonas;      |
| 395 | 0 | 1 | 1 | Bacteria;Proteobacteria;Gammaproteobacteria;unclassified;unclassified;unclassified;            |
| 396 | 0 | 0 | 2 | Bacteria;Proteobacteria;Alphaproteobacteria;unclassified;unclassified;unclassified;            |
| 397 | 0 | 1 | 1 | Bacteria;Proteobacteria;Alphaproteobacteria;Rhodobacterales;Rhodobacteraceae;unclassified;     |
| 398 | 0 | 2 | 0 | Bacteria;Bacteroidetes;unclassified;unclassified;unclassified;unclassified;                    |
| 399 | 0 | 2 | 0 | Bacteria;Proteobacteria;Alphaproteobacteria;Sneathiellales;Sneathiellaceae;Sneathiella;        |
| 400 | 0 | 2 | 0 | Bacteria;Bacteroidetes;unclassified;unclassified;unclassified;unclassified;                    |
| 401 | 0 | 0 | 2 | Bacteria;Proteobacteria;Alphaproteobacteria;Rhodobacterales;Rhodobacteraceae;unclassified;     |
| 402 | 0 | 2 | 0 | Bacteria;Bacteroidetes;Flavobacteria;Flavobacteriales;unclassified;unclassified;               |
| 403 | 0 | 2 | 0 | Bacteria;Bacteroidetes;unclassified;unclassified;unclassified;unclassified;                    |
| 404 | 2 | 0 | 0 | Bacteria;Proteobacteria;Gammaproteobacteria;Alteromonadales;Shewanellaceae;Shewanella;         |
| 405 | 0 | 0 | 2 | Bacteria;Bacteroidetes;unclassified;unclassified;unclassified;unclassified;                    |
| 406 | 0 | 2 | 0 | Bacteria;Bacteroidetes;unclassified;unclassified;unclassified;unclassified;                    |
| 407 | 0 | 2 | 0 | Bacteria;Proteobacteria;Gammaproteobacteria;unclassified;unclassified;unclassified;            |
| 408 | 0 | 2 | 0 | Bacteria;Firmicutes;Clostridia;Clostridiales;unclassified;unclassified;                        |
| 409 | 0 | 0 | 2 | Bacteria;Proteobacteria;unclassified;unclassified;unclassified;unclassified;                   |
| 410 | 2 | 0 | 0 | Bacteria;Firmicutes;Bacilli;Bacillales;Bacillaceae_1;Bacillus;                                 |
| 411 | 0 | 2 | 0 | Bacteria;unclassified;unclassified;unclassified;unclassified;unclassified;                     |
| 412 | 2 | 0 | 0 | Bacteria;Proteobacteria;Gammaproteobacteria;unclassified;unclassified;unclassified;            |
| 413 | 0 | 1 | 1 | Bacteria;Proteobacteria;Gammaproteobacteria;Chromatiales;Granulosicoccaceae;Granulosicoccus;   |
| 414 | 0 | 0 | 2 | Bacteria;Proteobacteria;Gammaproteobacteria;unclassified;unclassified;unclassified;            |
| 415 | 0 | 1 | 1 | Bacteria;Proteobacteria;Deltaproteobacteria;Desulfobacterales;Desulfobacteraceae;unclassified; |

|     |   |   |   |                                                                                                    |
|-----|---|---|---|----------------------------------------------------------------------------------------------------|
| 416 | 0 | 2 | 0 | Bacteria;Bacteroidetes;Sphingobacteria;Sphingobacteriales;Flammeovirgaceae;Fulvivirga;             |
| 417 | 0 | 0 | 2 | Bacteria;Proteobacteria;Epsilonproteobacteria;Campylobacterales;Helicobacteraceae;Sulfurovum;      |
| 418 | 0 | 0 | 2 | Bacteria;Proteobacteria;Epsilonproteobacteria;Campylobacterales;Campylobacteraceae;Arcobacter;     |
| 419 | 0 | 2 | 0 | Bacteria;Proteobacteria;Deltaproteobacteria;Desulfobacterales;Desulfobacteraceae;unclassified;     |
| 420 | 0 | 2 | 0 | Bacteria;Proteobacteria;Gammaproteobacteria;unclassified;unclassified;unclassified;                |
| 421 | 0 | 1 | 1 | Bacteria;Proteobacteria;Gammaproteobacteria;unclassified;unclassified;unclassified;                |
| 422 | 0 | 2 | 0 | Bacteria;unclassified;unclassified;unclassified;unclassified;unclassified;                         |
| 423 | 0 | 2 | 0 | Bacteria;unclassified;unclassified;unclassified;unclassified;unclassified;                         |
| 424 | 0 | 2 | 0 | Bacteria;unclassified;unclassified;unclassified;unclassified;unclassified;                         |
| 425 | 2 | 0 | 0 | Bacteria;Proteobacteria;Deltaproteobacteria;Desulfuromonadales;Desulfuromonadaceae;Desulfuromonas; |
| 426 | 0 | 0 | 2 | Bacteria;Proteobacteria;Gammaproteobacteria;unclassified;unclassified;unclassified;                |
| 427 | 2 | 0 | 0 | Bacteria;Firmicutes;Bacilli;Bacillales;Bacillaceae_1;Bacillus;                                     |
| 428 | 1 | 1 | 0 | Bacteria;Bacteroidetes;Flavobacteria;Flavobacteriales;unclassified;unclassified;                   |
| 429 | 2 | 0 | 0 | Bacteria;Proteobacteria;Gammaproteobacteria;Xanthomonadales;Xanthomonadaceae;unclassified;         |
| 430 | 0 | 2 | 0 | Bacteria;Bacteroidetes;unclassified;unclassified;unclassified;unclassified;                        |
| 431 | 0 | 2 | 0 | Bacteria;Bacteroidetes;unclassified;unclassified;unclassified;unclassified;                        |
| 432 | 0 | 1 | 1 | Bacteria;Bacteroidetes;Sphingobacteria;Sphingobacteriales;Flammeovirgaceae;unclassified;           |
| 433 | 0 | 2 | 0 | Bacteria;Bacteroidetes;unclassified;unclassified;unclassified;unclassified;                        |
| 434 | 0 | 0 | 2 | Bacteria;Proteobacteria;Alphaproteobacteria;Rhodobacterales;Rhodobacteraceae;unclassified;         |
| 435 | 0 | 0 | 2 | Bacteria;Proteobacteria;Gammaproteobacteria;unclassified;unclassified;unclassified;                |
| 436 | 0 | 2 | 0 | Bacteria;Proteobacteria;Deltaproteobacteria;Desulfobacterales;unclassified;unclassified;           |
| 437 | 0 | 1 | 1 | Bacteria;unclassified;unclassified;unclassified;unclassified;unclassified;                         |
| 438 | 0 | 0 | 2 | Bacteria;Bacteroidetes;unclassified;unclassified;unclassified;unclassified;                        |
| 439 | 0 | 0 | 2 | Bacteria;Proteobacteria;Gammaproteobacteria;unclassified;unclassified;unclassified;                |
| 440 | 0 | 1 | 1 | Bacteria;unclassified;unclassified;unclassified;unclassified;unclassified;                         |
| 441 | 0 | 1 | 1 | Bacteria;WS3;unclassified;unclassified;unclassified;unclassified;                                  |
| 442 | 0 | 2 | 0 | Bacteria;unclassified;unclassified;unclassified;unclassified;unclassified;                         |
| 443 | 0 | 0 | 2 | Bacteria;Proteobacteria;Gammaproteobacteria;Alteromonadales;Colwelliaceae;Colwellia;               |
| 444 | 0 | 0 | 2 | Bacteria;Bacteroidetes;Flavobacteria;Flavobacteriales;Flavobacteriaceae;unclassified;              |
| 445 | 0 | 2 | 0 | Bacteria;Proteobacteria;Alphaproteobacteria;Rhodobacterales;Rhodobacteraceae;unclassified;         |
| 446 | 0 | 0 | 2 | Bacteria;unclassified;unclassified;unclassified;unclassified;unclassified;                         |
| 447 | 0 | 2 | 0 | Bacteria;unclassified;unclassified;unclassified;unclassified;unclassified;                         |
| 448 | 0 | 2 | 0 | Bacteria;Bacteroidetes;unclassified;unclassified;unclassified;unclassified;                        |
| 449 | 0 | 0 | 2 | Bacteria;unclassified;unclassified;unclassified;unclassified;unclassified;                         |
| 450 | 0 | 2 | 0 | Bacteria;Bacteroidetes;unclassified;unclassified;unclassified;unclassified;                        |
| 451 | 0 | 2 | 0 | Bacteria;Proteobacteria;Deltaproteobacteria;Desulfobacterales;Desulfobulbaceae;unclassified;       |
| 452 | 0 | 0 | 2 | Bacteria;unclassified;unclassified;unclassified;unclassified;unclassified;                         |
| 453 | 0 | 2 | 0 | Bacteria;unclassified;unclassified;unclassified;unclassified;unclassified;                         |
| 454 | 0 | 2 | 0 | Bacteria;Proteobacteria;Gammaproteobacteria;unclassified;unclassified;unclassified;                |
| 455 | 0 | 2 | 0 | Bacteria;Bacteroidetes;unclassified;unclassified;unclassified;unclassified;                        |
| 456 | 0 | 0 | 2 | Bacteria;unclassified;unclassified;unclassified;unclassified;unclassified;                         |
| 457 | 0 | 2 | 0 | Bacteria;unclassified;unclassified;unclassified;unclassified;unclassified;                         |

|     |   |   |   |                                                                                                    |
|-----|---|---|---|----------------------------------------------------------------------------------------------------|
| 458 | 0 | 0 | 2 | Bacteria;Proteobacteria;Gammaproteobacteria;unclassified;unclassified;unclassified;                |
| 459 | 0 | 1 | 1 | Bacteria;Acidobacteria;Acidobacteria;Acidobacteriales;Acidobacteriaceae;Gp23                       |
| 460 | 0 | 0 | 2 | Bacteria;Proteobacteria;Gammaproteobacteria;unclassified;unclassified;unclassified;                |
| 461 | 0 | 0 | 2 | Bacteria;Proteobacteria;Alphaproteobacteria;unclassified;unclassified;unclassified;                |
| 462 | 0 | 0 | 2 | Bacteria;Bacteroidetes;unclassified;unclassified;unclassified;unclassified;                        |
| 463 | 0 | 1 | 1 | Bacteria;Proteobacteria;Deltaproteobacteria;Desulfobacterales;unclassified;unclassified;           |
| 464 | 0 | 2 | 0 | Bacteria;Bacteroidetes;unclassified;unclassified;unclassified;unclassified;                        |
| 465 | 0 | 2 | 0 | Bacteria;unclassified;unclassified;unclassified;unclassified;unclassified;                         |
| 466 | 0 | 0 | 2 | Bacteria;Firmicutes;Bacilli;Bacillales;Staphylococcaceae;Staphylococcus;                           |
| 467 | 0 | 0 | 2 | Bacteria;Bacteroidetes;unclassified;unclassified;unclassified;unclassified;                        |
| 468 | 0 | 0 | 2 | Bacteria;Proteobacteria;Alphaproteobacteria;unclassified;unclassified;unclassified;                |
| 469 | 0 | 0 | 2 | Bacteria;Proteobacteria;Gammaproteobacteria;unclassified;unclassified;unclassified;                |
| 470 | 0 | 2 | 0 | Bacteria;unclassified;unclassified;unclassified;unclassified;unclassified;                         |
| 471 | 0 | 0 | 2 | Bacteria;Proteobacteria;Gammaproteobacteria;unclassified;unclassified;unclassified;                |
| 472 | 0 | 0 | 2 | Bacteria;Bacteroidetes;unclassified;unclassified;unclassified;unclassified;                        |
| 473 | 0 | 2 | 0 | Bacteria;Proteobacteria;Deltaproteobacteria;unclassified;unclassified;unclassified;                |
| 474 | 0 | 1 | 1 | Bacteria;Proteobacteria;Betaproteobacteria;unclassified;unclassified;unclassified;                 |
| 475 | 0 | 2 | 0 | Bacteria;Proteobacteria;Epsilonproteobacteria;unclassified;unclassified;unclassified;              |
| 476 | 1 | 0 | 1 | Bacteria;Proteobacteria;Alphaproteobacteria;Rhizobiales;Methylocystaceae;Terasakiella;             |
| 477 | 0 | 1 | 1 | Bacteria;Proteobacteria;Deltaproteobacteria;Desulfobacterales;Desulfobacteraceae;Desulfobacula;    |
| 478 | 0 | 1 | 1 | Bacteria;Actinobacteria;Actinobacteria;Actinomycetales;unclassified;unclassified;                  |
| 479 | 0 | 2 | 0 | Bacteria;Proteobacteria;Gammaproteobacteria;unclassified;unclassified;unclassified;                |
| 480 | 0 | 2 | 0 | Bacteria;Proteobacteria;Deltaproteobacteria;Desulfobacterales;Desulfobulbaceae;unclassified;       |
| 481 | 0 | 0 | 2 | Bacteria;unclassified;unclassified;unclassified;unclassified;unclassified;                         |
| 482 | 0 | 2 | 0 | Bacteria;Proteobacteria;Gammaproteobacteria;Thiotrichales;Thiotrichaceae;Cocleimonas;              |
| 483 | 0 | 2 | 0 | Bacteria;Proteobacteria;Deltaproteobacteria;Desulfobacterales;Desulfobacteraceae;Desulfobacterium; |
| 484 | 0 | 2 | 0 | Bacteria;Bacteroidetes;Flavobacteria;Flavobacteriales;Flavobacteriaceae;Eudoraea;                  |
| 485 | 0 | 2 | 0 | Bacteria;Proteobacteria;Deltaproteobacteria;Desulfuromonadales;unclassified;unclassified;          |
| 486 | 0 | 2 | 0 | Bacteria;unclassified;unclassified;unclassified;unclassified;unclassified;                         |
| 487 | 1 | 0 | 1 | Bacteria;Proteobacteria;Alphaproteobacteria;Rhodobacterales;Rhodobacteraceae;unclassified;         |
| 488 | 2 | 0 | 0 | Bacteria;Proteobacteria;Gammaproteobacteria;unclassified;unclassified;unclassified;                |
| 489 | 0 | 0 | 2 | Bacteria;Proteobacteria;Deltaproteobacteria;Desulfuromonadales;Desulfuromonadaceae;unclassified;   |
| 490 | 0 | 2 | 0 | Bacteria;unclassified;unclassified;unclassified;unclassified;unclassified;                         |
| 491 | 2 | 0 | 0 | Bacteria;Proteobacteria;Betaproteobacteria;Burkholderiales;Comamonadaceae;Acidovorax;              |
| 492 | 0 | 0 | 2 | Bacteria;Proteobacteria;Gammaproteobacteria;unclassified;unclassified;unclassified;                |
| 493 | 0 | 2 | 0 | Bacteria;unclassified;unclassified;unclassified;unclassified;unclassified;                         |
| 494 | 0 | 2 | 0 | Bacteria;Bacteroidetes;unclassified;unclassified;unclassified;unclassified;                        |
| 495 | 0 | 0 | 2 | Bacteria;Proteobacteria;Epsilonproteobacteria;Campylobacteriales;Helicobacteraceae;Sulfurimonas;   |
| 496 | 0 | 0 | 2 | Bacteria;Proteobacteria;Deltaproteobacteria;unclassified;unclassified;unclassified;                |
| 497 | 2 | 0 | 0 | Bacteria;Bacteroidetes;Flavobacteria;Flavobacteriales;Flavobacteriaceae;Flavobacterium;            |
| 498 | 0 | 1 | 1 | Bacteria;Proteobacteria;Gammaproteobacteria;Oceanospirillales;Oceanospirillaceae;Spongiispira;     |
| 499 | 0 | 0 | 2 | Bacteria;Proteobacteria;Gammaproteobacteria;unclassified;unclassified;unclassified;                |

|     |   |   |   |                                                                                                |
|-----|---|---|---|------------------------------------------------------------------------------------------------|
| 500 | 0 | 0 | 2 | Bacteria;Spirochaetes;Spirochaetes;Spirochaetales;Spirochaetaceae;Spirochaeta;                 |
| 501 | 0 | 0 | 2 | Bacteria;Firmicutes;Bacilli;Lactobacillales;Streptococcaceae;Lactococcus;                      |
| 502 | 0 | 0 | 2 | Bacteria;Bacteroidetes;unclassified;unclassified;unclassified;unclassified;                    |
| 503 | 0 | 0 | 2 | Bacteria;Proteobacteria;unclassified;unclassified;unclassified;unclassified;                   |
| 504 | 0 | 2 | 0 | Bacteria;Proteobacteria;Gammaproteobacteria;unclassified;unclassified;unclassified;            |
| 505 | 0 | 0 | 2 | Bacteria;Proteobacteria;Deltaproteobacteria;Myxococcales;Nannocystaceae;unclassified;          |
| 506 | 0 | 0 | 2 | Bacteria;unclassified;unclassified;unclassified;unclassified;unclassified;                     |
| 507 | 0 | 0 | 2 | Bacteria;Proteobacteria;Deltaproteobacteria;Desulfobacterales;Desulfobacteraceae;unclassified; |
| 508 | 0 | 1 | 1 | Bacteria;Bacteroidetes;unclassified;unclassified;unclassified;unclassified;                    |
| 509 | 0 | 0 | 2 | Bacteria;Proteobacteria;Deltaproteobacteria;Desulfuromonadales;unclassified;unclassified;      |
| 510 | 1 | 0 | 1 | Bacteria;Proteobacteria;Gammaproteobacteria;Vibrionales;Vibrionaceae;Vibrio;                   |
| 511 | 0 | 2 | 0 | Bacteria;unclassified;unclassified;unclassified;unclassified;unclassified;                     |
| 512 | 0 | 1 | 0 | Bacteria;Proteobacteria;Alphaproteobacteria;unclassified;unclassified;unclassified;            |
| 513 | 0 | 1 | 0 | Bacteria;Proteobacteria;Gammaproteobacteria;unclassified;unclassified;unclassified;            |
| 514 | 0 | 0 | 1 | Bacteria;Firmicutes;Bacilli;Lactobacillales;Streptococcaceae;Lactococcus;                      |
| 515 | 0 | 0 | 1 | Bacteria;Proteobacteria;Alphaproteobacteria;Rhizobiales;unclassified;unclassified;             |
| 516 | 0 | 1 | 0 | Bacteria;Proteobacteria;Deltaproteobacteria;unclassified;unclassified;unclassified;            |
| 517 | 0 | 0 | 1 | Bacteria;Proteobacteria;Gammaproteobacteria;unclassified;unclassified;unclassified;            |
| 518 | 0 | 0 | 1 | Bacteria;Proteobacteria;Alphaproteobacteria;Rhodospirillales;Rhodospirillaceae;Pelagibius;     |
| 519 | 0 | 1 | 0 | Bacteria;Proteobacteria;Betaproteobacteria;unclassified;unclassified;unclassified;             |
| 520 | 0 | 1 | 0 | Bacteria;Proteobacteria;Alphaproteobacteria;Rhodobacterales;Rhodobacteraceae;Hwanghaeicola;    |
| 521 | 1 | 0 | 0 | Bacteria;Proteobacteria;Gammaproteobacteria;unclassified;unclassified;unclassified;            |
| 522 | 0 | 1 | 0 | Bacteria;Proteobacteria;Epsilonproteobacteria;Campylobacterales;unclassified;unclassified;     |
| 523 | 0 | 1 | 0 | Bacteria;Proteobacteria;Gammaproteobacteria;unclassified;unclassified;unclassified;            |
| 524 | 1 | 0 | 0 | Bacteria;Proteobacteria;Betaproteobacteria;unclassified;unclassified;unclassified;             |
| 525 | 0 | 1 | 0 | Bacteria;Proteobacteria;Alphaproteobacteria;Rhodospirillales;Rhodospirillaceae;unclassified;   |
| 526 | 0 | 1 | 0 | Bacteria;Proteobacteria;Alphaproteobacteria;Rhodobacterales;Rhodobacteraceae;unclassified;     |
| 527 | 0 | 0 | 1 | Bacteria;Proteobacteria;Deltaproteobacteria;Myxococcales;unclassified;unclassified;            |
| 528 | 0 | 1 | 0 | Bacteria;Proteobacteria;Alphaproteobacteria;Rhodobacterales;Rhodobacteraceae;unclassified;     |
| 529 | 0 | 0 | 1 | Bacteria;Bacteroidetes;Sphingobacteria;Sphingobacteriales;unclassified;unclassified;           |
| 530 | 0 | 1 | 0 | Bacteria;Proteobacteria;Deltaproteobacteria;unclassified;unclassified;unclassified;            |
| 531 | 0 | 1 | 0 | Bacteria;Proteobacteria;Betaproteobacteria;unclassified;unclassified;unclassified;             |
| 532 | 0 | 1 | 0 | Bacteria;Proteobacteria;Deltaproteobacteria;unclassified;unclassified;unclassified;            |
| 533 | 0 | 0 | 1 | Bacteria;Proteobacteria;Alphaproteobacteria;Rhodobacterales;Rhodobacteraceae;unclassified;     |
| 534 | 1 | 0 | 0 | Bacteria;Proteobacteria;Gammaproteobacteria;Enterobacteriales;Enterobacteriaceae;Pantoea;      |
| 535 | 0 | 0 | 1 | Bacteria;Proteobacteria;Gammaproteobacteria;unclassified;unclassified;unclassified;            |
| 536 | 0 | 1 | 0 | Bacteria;Proteobacteria;Gammaproteobacteria;unclassified;unclassified;unclassified;            |
| 537 | 0 | 1 | 0 | Bacteria;Proteobacteria;Alphaproteobacteria;Rhizobiales;unclassified;unclassified;             |
| 538 | 0 | 0 | 1 | Bacteria;Proteobacteria;Gammaproteobacteria;Vibrionales;Vibrionaceae;Photobacterium;           |
| 539 | 0 | 1 | 0 | Bacteria;unclassified;unclassified;unclassified;unclassified;unclassified;                     |
| 540 | 0 | 0 | 1 | Bacteria;Proteobacteria;Alphaproteobacteria;Rhodobacterales;Rhodobacteraceae;unclassified;     |
| 541 | 0 | 1 | 0 | Bacteria;Proteobacteria;Gammaproteobacteria;unclassified;unclassified;unclassified;            |



|     |   |   |   |                                                                                                   |
|-----|---|---|---|---------------------------------------------------------------------------------------------------|
| 542 | 0 | 0 | 1 | Bacteria;Proteobacteria;Alphaproteobacteria;unclassified;unclassified;unclassified;               |
| 543 | 0 | 1 | 0 | Bacteria;Proteobacteria;Deltaproteobacteria;Syntrophobacterales;unclassified;unclassified;        |
| 544 | 0 | 1 | 0 | Bacteria;Proteobacteria;Gammaproteobacteria;unclassified;unclassified;unclassified;               |
| 545 | 0 | 1 | 0 | Bacteria;Proteobacteria;Alphaproteobacteria;unclassified;unclassified;unclassified;               |
| 546 | 0 | 0 | 1 | Bacteria;Proteobacteria;Gammaproteobacteria;unclassified;unclassified;unclassified;               |
| 547 | 0 | 1 | 0 | Bacteria;Bacteroidetes;Sphingobacteria;Sphingobacteriales;Flammeovirgaceae;unclassified;          |
| 548 | 0 | 0 | 1 | Bacteria;Proteobacteria;Gammaproteobacteria;unclassified;unclassified;unclassified;               |
| 549 | 0 | 0 | 1 | Bacteria;Proteobacteria;Deltaproteobacteria;Myxococcales;unclassified;unclassified;               |
| 550 | 0 | 1 | 0 | Bacteria;Bacteroidetes;unclassified;unclassified;unclassified;unclassified;                       |
| 551 | 0 | 0 | 1 | Bacteria;unclassified;unclassified;unclassified;unclassified;unclassified;                        |
| 552 | 0 | 1 | 0 | Bacteria;Proteobacteria;Deltaproteobacteria;Desulfovibrionales;Desulfovibrionaceae;Desulfovibrio; |
| 553 | 0 | 0 | 1 | Bacteria;Proteobacteria;Deltaproteobacteria;Myxococcales;Haliangiaceae;Haliangium;                |
| 554 | 0 | 1 | 0 | Bacteria;unclassified;unclassified;unclassified;unclassified;unclassified;                        |
| 555 | 0 | 1 | 0 | Bacteria;Proteobacteria;Deltaproteobacteria;unclassified;unclassified;unclassified;               |
| 556 | 0 | 1 | 0 | Bacteria;Bacteroidetes;Flavobacteria;Flavobacteriales;Flavobacteriaceae;Robiginitalea;            |
| 557 | 0 | 1 | 0 | Bacteria;Proteobacteria;Deltaproteobacteria;Desulfobacterales;Desulfobacteraceae;unclassified;    |
| 558 | 0 | 1 | 0 | Bacteria;Bacteroidetes;unclassified;unclassified;unclassified;unclassified;                       |
| 559 | 0 | 1 | 0 | Bacteria;Bacteroidetes;unclassified;unclassified;unclassified;unclassified;                       |
| 560 | 0 | 1 | 0 | Bacteria;Bacteroidetes;unclassified;unclassified;unclassified;unclassified;                       |
| 561 | 0 | 0 | 1 | Bacteria;WS3;unclassified;unclassified;unclassified;unclassified;                                 |
| 562 | 0 | 1 | 0 | Bacteria;unclassified;unclassified;unclassified;unclassified;unclassified;                        |
| 563 | 0 | 1 | 0 | Bacteria;Proteobacteria;Gammaproteobacteria;unclassified;unclassified;unclassified;               |
| 564 | 0 | 0 | 1 | Bacteria;Proteobacteria;Gammaproteobacteria;unclassified;unclassified;unclassified;               |
| 565 | 0 | 1 | 0 | Bacteria;Proteobacteria;Deltaproteobacteria;Desulfobacterales;Desulfobacteraceae;unclassified;    |
| 566 | 0 | 1 | 0 | Bacteria;Bacteroidetes;unclassified;unclassified;unclassified;unclassified;                       |
| 567 | 0 | 0 | 1 | Bacteria;Proteobacteria;Alphaproteobacteria;Rhodospirillales;Rhodospirillaceae;unclassified;      |
| 568 | 0 | 0 | 1 | Bacteria;Proteobacteria;Epsilonproteobacteria;Campylobacteriales;Campylobacteraceae;Arcobacter;   |
| 569 | 0 | 1 | 0 | Bacteria;unclassified;unclassified;unclassified;unclassified;unclassified;                        |
| 570 | 0 | 1 | 0 | Bacteria;Proteobacteria;Gammaproteobacteria;unclassified;unclassified;unclassified;               |
| 571 | 0 | 0 | 1 | Bacteria;Proteobacteria;Gammaproteobacteria;unclassified;unclassified;unclassified;               |
| 572 | 0 | 1 | 0 | Bacteria;Proteobacteria;Alphaproteobacteria;unclassified;unclassified;unclassified;               |
| 573 | 0 | 1 | 0 | Bacteria;Proteobacteria;Gammaproteobacteria;Chromatiales;Chromatiaceae;unclassified;              |
| 574 | 0 | 0 | 1 | Bacteria;unclassified;unclassified;unclassified;unclassified;unclassified;                        |
| 575 | 0 | 0 | 1 | Bacteria;Proteobacteria;Gammaproteobacteria;Vibrionales;Vibrionaceae;Vibrio;                      |
| 576 | 0 | 0 | 1 | Bacteria;Proteobacteria;Gammaproteobacteria;unclassified;unclassified;unclassified;               |
| 577 | 0 | 0 | 1 | Bacteria;unclassified;unclassified;unclassified;unclassified;unclassified;                        |
| 578 | 0 | 0 | 1 | Bacteria;Bacteroidetes;unclassified;unclassified;unclassified;unclassified;                       |
| 579 | 0 | 1 | 0 | Bacteria;Proteobacteria;Deltaproteobacteria;unclassified;unclassified;unclassified;               |
| 580 | 0 | 0 | 1 | Bacteria;Proteobacteria;Gammaproteobacteria;unclassified;unclassified;unclassified;               |
| 581 | 0 | 0 | 1 | Bacteria;Proteobacteria;Alphaproteobacteria;unclassified;unclassified;unclassified;               |
| 582 | 0 | 0 | 1 | Bacteria;unclassified;unclassified;unclassified;unclassified;unclassified;                        |
| 583 | 0 | 1 | 0 | Bacteria;Proteobacteria;Alphaproteobacteria;Rhizobiales;Rhizobiaceae;Rhizobium;                   |

|     |   |   |   |                                                                                              |
|-----|---|---|---|----------------------------------------------------------------------------------------------|
| 584 | 0 | 0 | 1 | Bacteria;Proteobacteria;Gammaproteobacteria;unclassified;unclassified;unclassified;          |
| 585 | 0 | 0 | 1 | Bacteria;Proteobacteria;Deltaproteobacteria;Myxococcales;unclassified;unclassified;          |
| 586 | 0 | 0 | 1 | Bacteria;Proteobacteria;Alphaproteobacteria;Rhodobacterales;Rhodobacteraceae;unclassified;   |
| 587 | 0 | 0 | 1 | Bacteria;Proteobacteria;Alphaproteobacteria;unclassified;unclassified;unclassified;          |
| 588 | 0 | 1 | 0 | Bacteria;unclassified;unclassified;unclassified;unclassified;unclassified;                   |
| 589 | 0 | 0 | 1 | Bacteria;Actinobacteria;Actinobacteria;unclassified;unclassified;unclassified;               |
| 590 | 0 | 0 | 1 | Bacteria;Proteobacteria;Alphaproteobacteria;Rhodobacterales;Rhodobacteraceae;unclassified;   |
| 591 | 0 | 0 | 1 | Bacteria;Proteobacteria;Deltaproteobacteria;unclassified;unclassified;unclassified;          |
| 592 | 0 | 1 | 0 | Bacteria;Bacteroidetes;unclassified;unclassified;unclassified;unclassified;                  |
| 593 | 0 | 0 | 1 | Bacteria;Proteobacteria;Deltaproteobacteria;Desulfovibrionales;unclassified;unclassified;    |
| 594 | 0 | 0 | 1 | Bacteria;Proteobacteria;Alphaproteobacteria;Rhodospirillales;Rhodospirillaceae;unclassified; |
| 595 | 0 | 0 | 1 | Bacteria;Bacteroidetes;Flavobacteria;Flavobacteriales;unclassified;unclassified;             |
| 596 | 0 | 1 | 0 | Bacteria;unclassified;unclassified;unclassified;unclassified;unclassified;                   |
| 597 | 0 | 0 | 1 | Bacteria;Bacteroidetes;Flavobacteria;Flavobacteriales;Flavobacteriaceae;unclassified;        |
| 598 | 0 | 1 | 0 | Bacteria;Proteobacteria;Betaproteobacteria;Rhodocyclales;Rhodocyclaceae;unclassified;        |
| 599 | 0 | 0 | 1 | Bacteria;Proteobacteria;Alphaproteobacteria;Rhizobiales;unclassified;unclassified;           |
| 600 | 0 | 1 | 0 | Bacteria;unclassified;unclassified;unclassified;unclassified;unclassified;                   |
| 601 | 0 | 1 | 0 | Bacteria;Bacteroidetes;unclassified;unclassified;unclassified;unclassified;                  |
| 602 | 0 | 0 | 1 | Bacteria;unclassified;unclassified;unclassified;unclassified;unclassified;                   |
| 603 | 0 | 1 | 0 | Bacteria;Bacteroidetes;unclassified;unclassified;unclassified;unclassified;                  |
| 604 | 0 | 1 | 0 | Bacteria;Bacteroidetes;Sphingobacteria;Sphingobacteriales;Flammeovirgaceae;unclassified;     |
| 605 | 0 | 1 | 0 | Bacteria;Bacteroidetes;unclassified;unclassified;unclassified;unclassified;                  |
| 606 | 0 | 0 | 1 | Bacteria;Proteobacteria;Deltaproteobacteria;unclassified;unclassified;unclassified;          |
| 607 | 0 | 0 | 1 | Bacteria;Proteobacteria;Alphaproteobacteria;Rhodobacterales;Rhodobacteraceae;unclassified;   |
| 608 | 0 | 0 | 1 | Bacteria;Proteobacteria;Deltaproteobacteria;Myxococcales;Polyangiaceae;unclassified;         |
| 609 | 0 | 0 | 1 | Bacteria;Proteobacteria;Alphaproteobacteria;unclassified;unclassified;unclassified;          |
| 610 | 0 | 1 | 0 | Bacteria;Proteobacteria;Epsilonproteobacteria;unclassified;unclassified;unclassified;        |
| 611 | 0 | 0 | 1 | Bacteria;Firmicutes;Clostridia;Clostridiales;Peptostreptococcaceae;unclassified;             |
| 612 | 0 | 1 | 0 | Bacteria;Bacteroidetes;unclassified;unclassified;unclassified;unclassified;                  |
| 613 | 0 | 0 | 1 | Bacteria;Proteobacteria;Gammaproteobacteria;unclassified;unclassified;unclassified;          |
| 614 | 0 | 1 | 0 | Bacteria;Acidobacteria;Acidobacteria;Acidobacteriales;Acidobacteriaceae;Gp23                 |
| 615 | 0 | 1 | 0 | Bacteria;Proteobacteria;unclassified;unclassified;unclassified;unclassified;                 |
| 616 | 0 | 0 | 1 | Bacteria;Firmicutes;Bacilli;Lactobacillales;Streptococcaceae;Streptococcus;                  |
| 617 | 0 | 1 | 0 | Bacteria;unclassified;unclassified;unclassified;unclassified;unclassified;                   |
| 618 | 0 | 0 | 1 | Bacteria;Fusobacteria;Fusobacteria;Fusobacteriales;Fusobacteriaceae;unclassified;            |
| 619 | 0 | 0 | 1 | Bacteria;Bacteroidetes;Sphingobacteria;Sphingobacteriales;unclassified;unclassified;         |
| 620 | 0 | 1 | 0 | Bacteria;Proteobacteria;Deltaproteobacteria;unclassified;unclassified;unclassified;          |
| 621 | 0 | 0 | 1 | Bacteria;Proteobacteria;Deltaproteobacteria;unclassified;unclassified;unclassified;          |
| 622 | 0 | 0 | 1 | Bacteria;Bacteroidetes;unclassified;unclassified;unclassified;unclassified;                  |
| 623 | 0 | 1 | 0 | Bacteria;unclassified;unclassified;unclassified;unclassified;unclassified;                   |
| 624 | 0 | 1 | 0 | Bacteria;Bacteroidetes;unclassified;unclassified;unclassified;unclassified;                  |
| 625 | 0 | 0 | 1 | Bacteria;Proteobacteria;Gammaproteobacteria;Alteromonadales;unclassified;unclassified;       |

|     |   |   |   |                                                                                                |
|-----|---|---|---|------------------------------------------------------------------------------------------------|
| 626 | 0 | 0 | 1 | Bacteria;Proteobacteria;Alphaproteobacteria;Rhodobacterales;Rhodobacteraceae;Sulfitobacter;    |
| 627 | 0 | 0 | 1 | Bacteria;Proteobacteria;Gammaproteobacteria;unclassified;unclassified;unclassified;            |
| 628 | 0 | 1 | 0 | Bacteria;Proteobacteria;Deltaproteobacteria;Bdellovibrionales;Bacteriovoraceae;unclassified;   |
| 629 | 0 | 1 | 0 | Bacteria;Proteobacteria;Gammaproteobacteria;unclassified;unclassified;unclassified;            |
| 630 | 0 | 1 | 0 | Bacteria;unclassified;unclassified;unclassified;unclassified;unclassified;                     |
| 631 | 0 | 0 | 1 | Bacteria;Bacteroidetes;unclassified;unclassified;unclassified;unclassified;                    |
| 632 | 0 | 0 | 1 | Bacteria;Proteobacteria;Gammaproteobacteria;Vibrionales;Vibrionaceae;unclassified;             |
| 633 | 0 | 1 | 0 | Bacteria;unclassified;unclassified;unclassified;unclassified;unclassified;                     |
| 634 | 0 | 1 | 0 | Bacteria;Bacteroidetes;unclassified;unclassified;unclassified;unclassified;                    |
| 635 | 0 | 0 | 1 | Bacteria;Proteobacteria;Deltaproteobacteria;unclassified;unclassified;unclassified;            |
| 636 | 0 | 1 | 0 | Bacteria;Proteobacteria;Deltaproteobacteria;Desulfobacterales;Desulfobacteraceae;unclassified; |
| 637 | 0 | 1 | 0 | Bacteria;Proteobacteria;Deltaproteobacteria;unclassified;unclassified;unclassified;            |
| 638 | 0 | 0 | 1 | Bacteria;Proteobacteria;Gammaproteobacteria;unclassified;unclassified;unclassified;            |
| 639 | 0 | 0 | 1 | Bacteria;Proteobacteria;unclassified;unclassified;unclassified;unclassified;                   |
| 640 | 0 | 1 | 0 | Bacteria;Proteobacteria;Deltaproteobacteria;Myxococcales;unclassified;unclassified;            |
| 641 | 0 | 1 | 0 | Bacteria;Proteobacteria;Alphaproteobacteria;Sneathiellales;Sneathiellaceae;Sneathiella;        |
| 642 | 0 | 1 | 0 | Bacteria;Proteobacteria;Alphaproteobacteria;Rhizobiales;unclassified;unclassified;             |
| 643 | 0 | 0 | 1 | Bacteria;Proteobacteria;Alphaproteobacteria;unclassified;unclassified;unclassified;            |
| 644 | 0 | 1 | 0 | Bacteria;unclassified;unclassified;unclassified;unclassified;unclassified;                     |
| 645 | 0 | 0 | 1 | Bacteria;Firmicutes;Clostridia;Clostridiales;Clostridiaceae_1;Sarcina;                         |
| 646 | 0 | 1 | 0 | Bacteria;Proteobacteria;Alphaproteobacteria;unclassified;unclassified;unclassified;            |
| 647 | 0 | 1 | 0 | Bacteria;Bacteroidetes;unclassified;unclassified;unclassified;unclassified;                    |
| 648 | 0 | 1 | 0 | Bacteria;unclassified;unclassified;unclassified;unclassified;unclassified;                     |
| 649 | 0 | 0 | 1 | Bacteria;Proteobacteria;Alphaproteobacteria;unclassified;unclassified;unclassified;            |
| 650 | 0 | 1 | 0 | Bacteria;Bacteroidetes;unclassified;unclassified;unclassified;unclassified;                    |
| 651 | 0 | 0 | 1 | Bacteria;Bacteroidetes;unclassified;unclassified;unclassified;unclassified;                    |
| 652 | 0 | 0 | 1 | Bacteria;Proteobacteria;Alphaproteobacteria;Sphingomonadales;Sphingomonadaceae;Sphingopyxis;   |
| 653 | 0 | 1 | 0 | Bacteria;Bacteroidetes;unclassified;unclassified;unclassified;unclassified;                    |
| 654 | 0 | 0 | 1 | Bacteria;Proteobacteria;Deltaproteobacteria;Myxococcales;unclassified;unclassified;            |
| 655 | 0 | 0 | 1 | Bacteria;unclassified;unclassified;unclassified;unclassified;unclassified;                     |
| 656 | 0 | 0 | 1 | Bacteria;Proteobacteria;Gammaproteobacteria;unclassified;unclassified;unclassified;            |
| 657 | 0 | 1 | 0 | Bacteria;Proteobacteria;Alphaproteobacteria;unclassified;unclassified;unclassified;            |
| 658 | 0 | 1 | 0 | Bacteria;Bacteroidetes;unclassified;unclassified;unclassified;unclassified;                    |
| 659 | 0 | 0 | 1 | Bacteria;Proteobacteria;Gammaproteobacteria;unclassified;unclassified;unclassified;            |
| 660 | 0 | 1 | 0 | Bacteria;Bacteroidetes;unclassified;unclassified;unclassified;unclassified;                    |
| 661 | 0 | 1 | 0 | Bacteria;Bacteroidetes;unclassified;unclassified;unclassified;unclassified;                    |
| 662 | 0 | 0 | 1 | Bacteria;Proteobacteria;Gammaproteobacteria;unclassified;unclassified;unclassified;            |
| 663 | 0 | 0 | 1 | Bacteria;Proteobacteria;Gammaproteobacteria;unclassified;unclassified;unclassified;            |
| 664 | 0 | 0 | 1 | Bacteria;Fusobacteria;Fusobacteria;Fusobacteriales;unclassified;unclassified;                  |
| 665 | 0 | 1 | 0 | Bacteria;Bacteroidetes;unclassified;unclassified;unclassified;unclassified;                    |
| 666 | 0 | 0 | 1 | Bacteria;Proteobacteria;Gammaproteobacteria;unclassified;unclassified;unclassified;            |
| 667 | 0 | 0 | 1 | Bacteria;Proteobacteria;Epsilonproteobacteria;Campylobacterales;Campylobacteraceae;Arcobacter; |

|     |   |   |   |                                                                                                    |
|-----|---|---|---|----------------------------------------------------------------------------------------------------|
| 668 | 0 | 0 | 1 | Bacteria;Proteobacteria;Gammaproteobacteria;unclassified;unclassified;unclassified;                |
| 669 | 0 | 0 | 1 | Bacteria;Firmicutes;Clostridia;Clostridiales;Ruminococcaceae;Clostridium_III;                      |
| 670 | 0 | 0 | 1 | Bacteria;Proteobacteria;Alphaproteobacteria;Rhizobiales;unclassified;unclassified;                 |
| 671 | 0 | 0 | 1 | Bacteria;Proteobacteria;Deltaproteobacteria;Bdellovibrionales;Bacteriovoracaceae;unclassified;     |
| 672 | 0 | 1 | 0 | Bacteria;unclassified;unclassified;unclassified;unclassified;unclassified;                         |
| 673 | 0 | 0 | 1 | Bacteria;Proteobacteria;Deltaproteobacteria;Desulfobacterales;Desulfobacteraceae;unclassified;     |
| 674 | 0 | 0 | 1 | Bacteria;Bacteroidetes;unclassified;unclassified;unclassified;unclassified;                        |
| 675 | 0 | 1 | 0 | Bacteria;unclassified;unclassified;unclassified;unclassified;unclassified;                         |
| 676 | 0 | 1 | 0 | Bacteria;unclassified;unclassified;unclassified;unclassified;unclassified;                         |
| 677 | 0 | 0 | 1 | Bacteria;Proteobacteria;Gammaproteobacteria;Pseudomonadales;Pseudomonadaceae;Pseudomonas;          |
| 678 | 0 | 0 | 1 | Bacteria;Proteobacteria;unclassified;unclassified;unclassified;unclassified;                       |
| 679 | 0 | 0 | 1 | Bacteria;Proteobacteria;Alphaproteobacteria;unclassified;unclassified;unclassified;                |
| 680 | 0 | 0 | 1 | Bacteria;Proteobacteria;Gammaproteobacteria;unclassified;unclassified;unclassified;                |
| 681 | 0 | 0 | 1 | Bacteria;Proteobacteria;unclassified;unclassified;unclassified;unclassified;                       |
| 682 | 0 | 1 | 0 | Bacteria;Bacteroidetes;unclassified;unclassified;unclassified;unclassified;                        |
| 683 | 0 | 0 | 1 | Bacteria;Proteobacteria;Alphaproteobacteria;unclassified;unclassified;unclassified;                |
| 684 | 0 | 0 | 1 | Bacteria;Proteobacteria;Betaproteobacteria;unclassified;unclassified;unclassified;                 |
| 685 | 0 | 0 | 1 | Bacteria;Actinobacteria;Actinobacteria;unclassified;unclassified;unclassified;                     |
| 686 | 0 | 0 | 1 | Bacteria;Proteobacteria;Deltaproteobacteria;Myxococcales;unclassified;unclassified;                |
| 687 | 0 | 1 | 0 | Bacteria;Acidobacteria;Acidobacteria;Acidobacteriales;Acidobacteriaceae;Gp24                       |
| 688 | 0 | 1 | 0 | Bacteria;Proteobacteria;Alphaproteobacteria;Sphingomonadales;Erythrobacteraceae;Altererythroacter; |
| 689 | 0 | 1 | 0 | Bacteria;unclassified;unclassified;unclassified;unclassified;unclassified;                         |
| 690 | 0 | 1 | 0 | Bacteria;unclassified;unclassified;unclassified;unclassified;unclassified;                         |
| 691 | 0 | 1 | 0 | Bacteria;Proteobacteria;Alphaproteobacteria;Rhodobacterales;Rhodobacteraceae;unclassified;         |
| 692 | 0 | 1 | 0 | Bacteria;unclassified;unclassified;unclassified;unclassified;unclassified;                         |
| 693 | 0 | 1 | 0 | Bacteria;Proteobacteria;Deltaproteobacteria;Bdellovibrionales;Bacteriovoracaceae;Bacteriovorax;    |
| 694 | 0 | 1 | 0 | Bacteria;Bacteroidetes;unclassified;unclassified;unclassified;unclassified;                        |
| 695 | 0 | 1 | 0 | Bacteria;Proteobacteria;Gammaproteobacteria;unclassified;unclassified;unclassified;                |
| 696 | 0 | 1 | 0 | Bacteria;Proteobacteria;Deltaproteobacteria;Desulfobacterales;Desulfobacteraceae;unclassified;     |
| 697 | 0 | 1 | 0 | Bacteria;Bacteroidetes;Flavobacteria;Flavobacteriales;Flavobacteriaceae;unclassified;              |
| 698 | 0 | 1 | 0 | Bacteria;Bacteroidetes;unclassified;unclassified;unclassified;unclassified;                        |
| 699 | 0 | 1 | 0 | Bacteria;Proteobacteria;Deltaproteobacteria;Desulfobacterales;Desulfobacteraceae;unclassified;     |
| 700 | 0 | 1 | 0 | Bacteria;unclassified;unclassified;unclassified;unclassified;unclassified;                         |
| 701 | 0 | 1 | 0 | Bacteria;unclassified;unclassified;unclassified;unclassified;unclassified;                         |
| 702 | 0 | 1 | 0 | Bacteria;Proteobacteria;Deltaproteobacteria;Desulfobacterales;Desulfobulbaceae;unclassified;       |
| 703 | 0 | 1 | 0 | Bacteria;Bacteroidetes;unclassified;unclassified;unclassified;unclassified;                        |
| 704 | 0 | 1 | 0 | Bacteria;Bacteroidetes;unclassified;unclassified;unclassified;unclassified;                        |
| 705 | 0 | 1 | 0 | Bacteria;Bacteroidetes;unclassified;unclassified;unclassified;unclassified;                        |
| 706 | 0 | 1 | 0 | Bacteria;Proteobacteria;Deltaproteobacteria;unclassified;unclassified;unclassified;                |
| 707 | 0 | 1 | 0 | Bacteria;Firmicutes;Clostridia;Clostridiales;Ruminococcaceae;unclassified;                         |
| 708 | 0 | 1 | 0 | Bacteria;Proteobacteria;Gammaproteobacteria;unclassified;unclassified;unclassified;                |
| 709 | 0 | 1 | 0 | Bacteria;unclassified;unclassified;unclassified;unclassified;unclassified;                         |

|     |   |   |   |                                                                                                |
|-----|---|---|---|------------------------------------------------------------------------------------------------|
| 710 | 0 | 1 | 0 | Bacteria;Proteobacteria;Gammaproteobacteria;unclassified;unclassified;unclassified;            |
| 711 | 0 | 1 | 0 | Bacteria;unclassified;unclassified;unclassified;unclassified;unclassified;                     |
| 712 | 0 | 1 | 0 | Bacteria;Bacteroidetes;unclassified;unclassified;unclassified;unclassified;                    |
| 713 | 0 | 1 | 0 | Bacteria;Bacteroidetes;unclassified;unclassified;unclassified;unclassified;                    |
| 714 | 0 | 1 | 0 | Bacteria;Bacteroidetes;unclassified;unclassified;unclassified;unclassified;                    |
| 715 | 0 | 1 | 0 | Bacteria;Bacteroidetes;unclassified;unclassified;unclassified;unclassified;                    |
| 716 | 0 | 1 | 0 | Bacteria;Bacteroidetes;Flavobacteria;Flavobacteriales;Flavobacteriaceae;Lutibacter;            |
| 717 | 0 | 1 | 0 | Bacteria;Proteobacteria;Alphaproteobacteria;Rhodobacterales;Rhodobacteraceae;unclassified;     |
| 718 | 0 | 1 | 0 | Bacteria;unclassified;unclassified;unclassified;unclassified;unclassified;                     |
| 719 | 0 | 1 | 0 | Bacteria;Spirochaetes;Spirochaetes;Spirochaetales;Spirochaetaceae;Spirochaeta;                 |
| 720 | 0 | 1 | 0 | Bacteria;Proteobacteria;Gammaproteobacteria;Chromatiales;Chromatiaceae;unclassified;           |
| 721 | 0 | 1 | 0 | Bacteria;Bacteroidetes;unclassified;unclassified;unclassified;unclassified;                    |
| 722 | 0 | 1 | 0 | Bacteria;Proteobacteria;Deltaproteobacteria;Desulfobacterales;Desulfobacteraceae;unclassified; |
| 723 | 0 | 1 | 0 | Bacteria;Bacteroidetes;unclassified;unclassified;unclassified;unclassified;                    |
| 724 | 0 | 1 | 0 | Bacteria;Proteobacteria;unclassified;unclassified;unclassified;unclassified;                   |
| 725 | 0 | 1 | 0 | Bacteria;Spirochaetes;Spirochaetes;Spirochaetales;Spirochaetaceae;unclassified;                |
| 726 | 0 | 1 | 0 | Bacteria;Proteobacteria;Deltaproteobacteria;unclassified;unclassified;unclassified;            |
| 727 | 0 | 1 | 0 | Bacteria;Proteobacteria;Deltaproteobacteria;unclassified;unclassified;unclassified;            |
| 728 | 0 | 1 | 0 | Bacteria;Proteobacteria;Deltaproteobacteria;Desulfobacterales;Desulfobulbaceae;unclassified;   |
| 729 | 0 | 1 | 0 | Bacteria;Bacteroidetes;Bacteroidia;Marinilabiliales;Prolixibacteraceae;Prolixibacter;          |
| 730 | 0 | 1 | 0 | Bacteria;Proteobacteria;Gammaproteobacteria;Chromatiales;unclassified;unclassified;            |
| 731 | 0 | 1 | 0 | Bacteria;Bacteroidetes;unclassified;unclassified;unclassified;unclassified;                    |
| 732 | 0 | 1 | 0 | Bacteria;Proteobacteria;Gammaproteobacteria;unclassified;unclassified;unclassified;            |
| 733 | 0 | 1 | 0 | Bacteria;Firmicutes;Clostridia;Clostridiales;unclassified;unclassified;                        |
| 734 | 0 | 1 | 0 | Bacteria;Proteobacteria;Gammaproteobacteria;unclassified;unclassified;unclassified;            |
| 735 | 0 | 1 | 0 | Bacteria;Proteobacteria;Alphaproteobacteria;Rhodobacterales;Rhodobacteraceae;Jannaschia;       |
| 736 | 0 | 1 | 0 | Bacteria;Proteobacteria;Gammaproteobacteria;unclassified;unclassified;unclassified;            |
| 737 | 0 | 1 | 0 | Bacteria;Proteobacteria;Deltaproteobacteria;Desulfobacterales;unclassified;unclassified;       |
| 738 | 0 | 1 | 0 | Bacteria;Bacteroidetes;Sphingobacteria;Sphingobacteriales;unclassified;unclassified;           |
| 739 | 0 | 1 | 0 | Bacteria;Proteobacteria;Deltaproteobacteria;Myxococcales;unclassified;unclassified;            |
| 740 | 0 | 1 | 0 | Bacteria;Actinobacteria;Actinobacteria;unclassified;unclassified;unclassified;                 |
| 741 | 0 | 1 | 0 | Bacteria;unclassified;unclassified;unclassified;unclassified;unclassified;                     |
| 742 | 0 | 1 | 0 | Bacteria;Bacteroidetes;unclassified;unclassified;unclassified;unclassified;                    |
| 743 | 0 | 1 | 0 | Bacteria;unclassified;unclassified;unclassified;unclassified;unclassified;                     |
| 744 | 0 | 1 | 0 | Bacteria;unclassified;unclassified;unclassified;unclassified;unclassified;                     |
| 745 | 0 | 1 | 0 | Bacteria;Proteobacteria;Gammaproteobacteria;unclassified;unclassified;unclassified;            |
| 746 | 0 | 1 | 0 | Bacteria;Bacteroidetes;unclassified;unclassified;unclassified;unclassified;                    |
| 747 | 0 | 1 | 0 | Bacteria;Proteobacteria;Deltaproteobacteria;unclassified;unclassified;unclassified;            |
| 748 | 0 | 1 | 0 | Bacteria;Proteobacteria;Deltaproteobacteria;Desulfobacterales;Desulfobacteraceae;unclassified; |
| 749 | 0 | 1 | 0 | Bacteria;Proteobacteria;unclassified;unclassified;unclassified;unclassified;                   |
| 750 | 0 | 1 | 0 | Bacteria;Actinobacteria;Actinobacteria;unclassified;unclassified;unclassified;                 |
| 751 | 0 | 1 | 0 | Bacteria;unclassified;unclassified;unclassified;unclassified;unclassified;                     |

|     |   |   |   |                                                                                                 |
|-----|---|---|---|-------------------------------------------------------------------------------------------------|
| 752 | 0 | 1 | 0 | Bacteria;Bacteroidetes;unclassified;unclassified;unclassified;unclassified;                     |
| 753 | 0 | 1 | 0 | Bacteria;unclassified;unclassified;unclassified;unclassified;unclassified;                      |
| 754 | 0 | 1 | 0 | Bacteria;Proteobacteria;Alphaproteobacteria;Rhodobacterales;Rhodobacteraceae;unclassified;      |
| 755 | 0 | 1 | 0 | Bacteria;Proteobacteria;unclassified;unclassified;unclassified;unclassified;                    |
| 756 | 0 | 1 | 0 | Bacteria;Bacteroidetes;unclassified;unclassified;unclassified;unclassified;                     |
| 757 | 0 | 1 | 0 | Bacteria;Proteobacteria;Epsilonproteobacteria;unclassified;unclassified;unclassified;           |
| 758 | 0 | 1 | 0 | Bacteria;unclassified;unclassified;unclassified;unclassified;unclassified;                      |
| 759 | 0 | 1 | 0 | Bacteria;unclassified;unclassified;unclassified;unclassified;unclassified;                      |
| 760 | 0 | 1 | 0 | Bacteria;Proteobacteria;Epsilonproteobacteria;Campylobacterales;Helicobacteraceae;Sulfurovum;   |
| 761 | 0 | 1 | 0 | Bacteria;unclassified;unclassified;unclassified;unclassified;unclassified;                      |
| 762 | 0 | 1 | 0 | Bacteria;Proteobacteria;Alphaproteobacteria;Rhodobacterales;Rhodobacteraceae;unclassified;      |
| 763 | 0 | 1 | 0 | Bacteria;Bacteroidetes;Flavobacteria;Flavobacteriales;Flavobacteriaceae;Actibacter;             |
| 764 | 0 | 1 | 0 | Bacteria;Proteobacteria;Gammaproteobacteria;Oceanospirillales;Hahellaceae;Hahella;              |
| 765 | 0 | 1 | 0 | Bacteria;Proteobacteria;Deltaproteobacteria;Bdellovibrionales;Bacteriovoracaceae;Bacteriovorax; |
| 766 | 0 | 1 | 0 | Bacteria;Bacteroidetes;unclassified;unclassified;unclassified;unclassified;                     |
| 767 | 0 | 1 | 0 | Bacteria;Proteobacteria;unclassified;unclassified;unclassified;unclassified;                    |
| 768 | 0 | 1 | 0 | Bacteria;Proteobacteria;unclassified;unclassified;unclassified;unclassified;                    |
| 769 | 0 | 1 | 0 | Bacteria;Proteobacteria;Deltaproteobacteria;Desulfobacterales;Desulfobacteraceae;unclassified;  |
| 770 | 0 | 1 | 0 | Bacteria;Proteobacteria;Deltaproteobacteria;unclassified;unclassified;unclassified;             |
| 771 | 0 | 1 | 0 | Bacteria;Bacteroidetes;unclassified;unclassified;unclassified;unclassified;                     |
| 772 | 0 | 1 | 0 | Bacteria;Firmicutes;Bacilli;Bacillales;Paenibacillaceae_1;Paenibacillus;                        |
| 773 | 0 | 1 | 0 | Bacteria;Proteobacteria;Gammaproteobacteria;Alteromonadales;Alteromonadaceae;Haliea;            |
| 774 | 0 | 1 | 0 | Bacteria;unclassified;unclassified;unclassified;unclassified;unclassified;                      |
| 775 | 0 | 1 | 0 | Bacteria;Proteobacteria;Alphaproteobacteria;unclassified;unclassified;unclassified;             |
| 776 | 0 | 1 | 0 | Bacteria;Proteobacteria;Deltaproteobacteria;Desulfobacterales;Desulfobacteraceae;unclassified;  |
| 777 | 0 | 1 | 0 | Bacteria;Proteobacteria;Gammaproteobacteria;unclassified;unclassified;unclassified;             |
| 778 | 0 | 1 | 0 | Bacteria;Proteobacteria;Gammaproteobacteria;Oceanospirillales;Hahellaceae;Hahella;              |
| 779 | 0 | 1 | 0 | Bacteria;unclassified;unclassified;unclassified;unclassified;unclassified;                      |
| 780 | 0 | 1 | 0 | Bacteria;Bacteroidetes;unclassified;unclassified;unclassified;unclassified;                     |
| 781 | 0 | 1 | 0 | Bacteria;Proteobacteria;Epsilonproteobacteria;Campylobacterales;Campylobacteraceae;Arcobacter;  |
| 782 | 0 | 1 | 0 | Bacteria;Proteobacteria;Deltaproteobacteria;unclassified;unclassified;unclassified;             |
| 783 | 0 | 1 | 0 | Bacteria;Bacteroidetes;unclassified;unclassified;unclassified;unclassified;                     |
| 784 | 0 | 1 | 0 | Bacteria;Proteobacteria;unclassified;unclassified;unclassified;unclassified;                    |
| 785 | 0 | 1 | 0 | Bacteria;Bacteroidetes;unclassified;unclassified;unclassified;unclassified;                     |
| 786 | 0 | 1 | 0 | Bacteria;Bacteroidetes;unclassified;unclassified;unclassified;unclassified;                     |
| 787 | 0 | 1 | 0 | Bacteria;Bacteroidetes;Flavobacteria;Flavobacteriales;Cryomorphaceae;unclassified;              |
| 788 | 0 | 1 | 0 | Bacteria;Proteobacteria;Deltaproteobacteria;Desulfobacterales;Desulfobacteraceae;unclassified;  |
| 789 | 0 | 1 | 0 | Bacteria;Acidobacteria;Acidobacteria;Acidobacteriales;Acidobacteriaceae;Gp23                    |
| 790 | 0 | 1 | 0 | Bacteria;Proteobacteria;Epsilonproteobacteria;Campylobacterales;Campylobacteraceae;Arcobacter;  |
| 791 | 0 | 1 | 0 | Bacteria;unclassified;unclassified;unclassified;unclassified;unclassified;                      |
| 792 | 0 | 1 | 0 | Bacteria;Proteobacteria;Gammaproteobacteria;unclassified;unclassified;unclassified;             |
| 793 | 0 | 1 | 0 | Bacteria;unclassified;unclassified;unclassified;unclassified;unclassified;                      |

|     |   |   |   |                                                                                                   |
|-----|---|---|---|---------------------------------------------------------------------------------------------------|
| 794 | 0 | 1 | 0 | Bacteria;unclassified;unclassified;unclassified;unclassified;unclassified;                        |
| 795 | 0 | 1 | 0 | Bacteria;Proteobacteria;Deltaproteobacteria;Desulfuromonadales;Desulfuromonadaceae;Desulfuromusa; |
| 796 | 0 | 1 | 0 | Bacteria;unclassified;unclassified;unclassified;unclassified;unclassified;                        |
| 797 | 0 | 1 | 0 | Bacteria;unclassified;unclassified;unclassified;unclassified;unclassified;                        |
| 798 | 0 | 1 | 0 | Bacteria;Proteobacteria;Epsilonproteobacteria;Campylobacterales;Campylobacteraceae;Arcobacter;    |
| 799 | 0 | 1 | 0 | Bacteria;Acidobacteria;Acidobacteria;Acidobacteriales;Acidobacteriaceae;Gp23                      |
| 800 | 0 | 1 | 0 | Bacteria;Proteobacteria;Gammaproteobacteria;unclassified;unclassified;unclassified;               |
| 801 | 0 | 1 | 0 | Bacteria;Bacteroidetes;unclassified;unclassified;unclassified;unclassified;                       |
| 802 | 0 | 1 | 0 | Bacteria;Proteobacteria;unclassified;unclassified;unclassified;unclassified;                      |
| 803 | 0 | 1 | 0 | Bacteria;unclassified;unclassified;unclassified;unclassified;unclassified;                        |
| 804 | 0 | 1 | 0 | Bacteria;Actinobacteria;Actinobacteria;Actinomycetales;unclassified;unclassified;                 |
| 805 | 0 | 1 | 0 | Bacteria;Proteobacteria;Deltaproteobacteria;Desulfobacterales;Desulfobulbaceae;Desulfopila;       |
| 806 | 0 | 1 | 0 | Bacteria;Proteobacteria;Deltaproteobacteria;Desulfobacterales;Desulfobacteraceae;unclassified;    |
| 807 | 0 | 1 | 0 | Bacteria;Proteobacteria;Alphaproteobacteria;Rhizobiales;unclassified;unclassified;                |
| 808 | 0 | 1 | 0 | Bacteria;Bacteroidetes;unclassified;unclassified;unclassified;unclassified;                       |
| 809 | 0 | 1 | 0 | Bacteria;unclassified;unclassified;unclassified;unclassified;unclassified;                        |
| 810 | 0 | 1 | 0 | Bacteria;Proteobacteria;Alphaproteobacteria;Rhodobacterales;Rhodobacteraceae;unclassified;        |
| 811 | 0 | 1 | 0 | Bacteria;Proteobacteria;Deltaproteobacteria;Myxococcales;unclassified;unclassified;               |
| 812 | 0 | 1 | 0 | Bacteria;Proteobacteria;Alphaproteobacteria;Rhodospirillales;Rhodospirillaceae;unclassified;      |
| 813 | 0 | 1 | 0 | Bacteria;unclassified;unclassified;unclassified;unclassified;unclassified;                        |
| 814 | 0 | 1 | 0 | Bacteria;unclassified;unclassified;unclassified;unclassified;unclassified;                        |
| 815 | 0 | 1 | 0 | Bacteria;Proteobacteria;Deltaproteobacteria;Desulfobacterales;Desulfobacteraceae;unclassified;    |
| 816 | 0 | 1 | 0 | Bacteria;Proteobacteria;Deltaproteobacteria;unclassified;unclassified;unclassified;               |
| 817 | 0 | 1 | 0 | Bacteria;Proteobacteria;Deltaproteobacteria;Desulfobacterales;Desulfobacteraceae;unclassified;    |
| 818 | 0 | 1 | 0 | Bacteria;Bacteroidetes;unclassified;unclassified;unclassified;unclassified;                       |
| 819 | 0 | 1 | 0 | Bacteria;Acidobacteria;Acidobacteria;Acidobacteriales;Acidobacteriaceae;Gp22                      |
| 820 | 0 | 1 | 0 | Bacteria;Proteobacteria;Deltaproteobacteria;Desulfobacterales;Desulfobacteraceae;unclassified;    |
| 821 | 0 | 1 | 0 | Bacteria;Proteobacteria;Deltaproteobacteria;Desulfobacterales;Desulfobacteraceae;unclassified;    |
| 822 | 0 | 1 | 0 | Bacteria;Proteobacteria;Deltaproteobacteria;Desulfobacterales;Desulfobacteraceae;unclassified;    |
| 823 | 0 | 1 | 0 | Bacteria;Bacteroidetes;unclassified;unclassified;unclassified;unclassified;                       |
| 824 | 0 | 1 | 0 | Bacteria;Bacteroidetes;unclassified;unclassified;unclassified;unclassified;                       |
| 825 | 0 | 1 | 0 | Bacteria;Proteobacteria;Deltaproteobacteria;unclassified;unclassified;unclassified;               |
| 826 | 0 | 1 | 0 | Bacteria;Proteobacteria;Gammaproteobacteria;unclassified;unclassified;unclassified;               |
| 827 | 0 | 1 | 0 | Bacteria;WS3;unclassified;unclassified;unclassified;unclassified;                                 |
| 828 | 0 | 1 | 0 | Bacteria;Proteobacteria;Gammaproteobacteria;unclassified;unclassified;unclassified;               |
| 829 | 0 | 1 | 0 | Bacteria;Proteobacteria;Deltaproteobacteria;Desulfobacterales;Desulfobacteraceae;unclassified;    |
| 830 | 0 | 1 | 0 | Bacteria;Bacteroidetes;unclassified;unclassified;unclassified;unclassified;                       |
| 831 | 0 | 1 | 0 | Bacteria;Proteobacteria;Alphaproteobacteria;Rhizobiales;unclassified;unclassified;                |
| 832 | 0 | 1 | 0 | Bacteria;Proteobacteria;Gammaproteobacteria;unclassified;unclassified;unclassified;               |
| 833 | 0 | 1 | 0 | Bacteria;unclassified;unclassified;unclassified;unclassified;unclassified;                        |
| 834 | 0 | 1 | 0 | Bacteria;unclassified;unclassified;unclassified;unclassified;unclassified;                        |
| 835 | 0 | 1 | 0 | Bacteria;Bacteroidetes;unclassified;unclassified;unclassified;unclassified;                       |

|     |   |   |   |                                                                                                   |
|-----|---|---|---|---------------------------------------------------------------------------------------------------|
| 836 | 0 | 1 | 0 | Bacteria;unclassified;unclassified;unclassified;unclassified;unclassified;                        |
| 837 | 0 | 1 | 0 | Bacteria;Proteobacteria;Gammaproteobacteria;unclassified;unclassified;unclassified;               |
| 838 | 0 | 1 | 0 | Bacteria;unclassified;unclassified;unclassified;unclassified;unclassified;                        |
| 839 | 0 | 1 | 0 | Bacteria;Proteobacteria;Alphaproteobacteria;unclassified;unclassified;unclassified;               |
| 840 | 0 | 1 | 0 | Bacteria;Bacteroidetes;unclassified;unclassified;unclassified;unclassified;                       |
| 841 | 0 | 1 | 0 | Bacteria;Bacteroidetes;unclassified;unclassified;unclassified;unclassified;                       |
| 842 | 0 | 1 | 0 | Bacteria;unclassified;unclassified;unclassified;unclassified;unclassified;                        |
| 843 | 0 | 1 | 0 | Bacteria;unclassified;unclassified;unclassified;unclassified;unclassified;                        |
| 844 | 0 | 1 | 0 | Bacteria;Proteobacteria;Deltaproteobacteria;Desulfobacterales;Desulfobacteraceae;unclassified;    |
| 845 | 0 | 1 | 0 | Bacteria;unclassified;unclassified;unclassified;unclassified;unclassified;                        |
| 846 | 0 | 1 | 0 | Bacteria;unclassified;unclassified;unclassified;unclassified;unclassified;                        |
| 847 | 0 | 1 | 0 | Bacteria;Proteobacteria;Gammaproteobacteria;Oceanospirillales;Alcanovoracaceae;Marinicella;       |
| 848 | 0 | 1 | 0 | Bacteria;Proteobacteria;Gammaproteobacteria;unclassified;unclassified;unclassified;               |
| 849 | 0 | 1 | 0 | Bacteria;Firmicutes;unclassified;unclassified;unclassified;unclassified;                          |
| 850 | 0 | 1 | 0 | Bacteria;Proteobacteria;unclassified;unclassified;unclassified;unclassified;                      |
| 851 | 0 | 1 | 0 | Bacteria;Bacteroidetes;unclassified;unclassified;unclassified;unclassified;                       |
| 852 | 0 | 1 | 0 | Bacteria;unclassified;unclassified;unclassified;unclassified;unclassified;                        |
| 853 | 0 | 1 | 0 | Bacteria;Bacteroidetes;unclassified;unclassified;unclassified;unclassified;                       |
| 854 | 0 | 1 | 0 | Bacteria;unclassified;unclassified;unclassified;unclassified;unclassified;                        |
| 855 | 0 | 1 | 0 | Bacteria;unclassified;unclassified;unclassified;unclassified;unclassified;                        |
| 856 | 0 | 1 | 0 | Bacteria;unclassified;unclassified;unclassified;unclassified;unclassified;                        |
| 857 | 0 | 1 | 0 | Bacteria;unclassified;unclassified;unclassified;unclassified;unclassified;                        |
| 858 | 0 | 1 | 0 | Bacteria;Acidobacteria;Acidobacteria;Acidobacteriales;Acidobacteriaceae;Gp21                      |
| 859 | 0 | 1 | 0 | Bacteria;Proteobacteria;Gammaproteobacteria;Oceanospirillales;Halomonadaceae;Halomonas;           |
| 860 | 0 | 1 | 0 | Bacteria;Verrucomicrobia;Opitutae;Puniceococcales;Puniceococcaceae;Coraliomargarita;              |
| 861 | 0 | 1 | 0 | Bacteria;Proteobacteria;Gammaproteobacteria;unclassified;unclassified;unclassified;               |
| 862 | 0 | 1 | 0 | Bacteria;Proteobacteria;Deltaproteobacteria;Desulfobacterales;Desulfobacteraceae;unclassified;    |
| 863 | 0 | 1 | 0 | Bacteria;Proteobacteria;Gammaproteobacteria;unclassified;unclassified;unclassified;               |
| 864 | 0 | 1 | 0 | Bacteria;unclassified;unclassified;unclassified;unclassified;unclassified;                        |
| 865 | 0 | 1 | 0 | Bacteria;unclassified;unclassified;unclassified;unclassified;unclassified;                        |
| 866 | 0 | 1 | 0 | Bacteria;Bacteroidetes;unclassified;unclassified;unclassified;unclassified;                       |
| 867 | 0 | 1 | 0 | Bacteria;Proteobacteria;Alphaproteobacteria;Rhodobacterales;Rhodobacteraceae;unclassified;        |
| 868 | 0 | 1 | 0 | Bacteria;Proteobacteria;Deltaproteobacteria;Desulfovibrionales;Desulfovibrionaceae;Desulfovibrio; |
| 869 | 0 | 1 | 0 | Bacteria;Spirochaetes;Spirochaetes;Spirochaetales;Spirochaetaceae;Spirochaeta;                    |
| 870 | 0 | 1 | 0 | Bacteria;unclassified;unclassified;unclassified;unclassified;unclassified;                        |
| 871 | 0 | 1 | 0 | Bacteria;unclassified;unclassified;unclassified;unclassified;unclassified;                        |
| 872 | 0 | 1 | 0 | Bacteria;Acidobacteria;Acidobacteria;Acidobacteriales;Acidobacteriaceae;Gp23                      |
| 873 | 0 | 1 | 0 | Bacteria;Proteobacteria;Alphaproteobacteria;unclassified;unclassified;unclassified;               |
| 874 | 0 | 1 | 0 | Bacteria;unclassified;unclassified;unclassified;unclassified;unclassified;                        |
| 875 | 0 | 1 | 0 | Bacteria;Proteobacteria;Deltaproteobacteria;Desulfobacterales;Desulfobacteraceae;Desulfobacter;   |
| 876 | 0 | 1 | 0 | Bacteria;Acidobacteria;Acidobacteria;Acidobacteriales;Acidobacteriaceae;Gp22                      |
| 877 | 0 | 1 | 0 | Bacteria;unclassified;unclassified;unclassified;unclassified;unclassified;                        |



|     |   |   |   |                                                                                                    |
|-----|---|---|---|----------------------------------------------------------------------------------------------------|
| 878 | 0 | 1 | 0 | Bacteria;Proteobacteria;Alphaproteobacteria;Sphingomonadales;unclassified;unclassified;            |
| 879 | 0 | 1 | 0 | Bacteria;Proteobacteria;unclassified;unclassified;unclassified;unclassified;                       |
| 880 | 0 | 1 | 0 | Bacteria;Proteobacteria;Alphaproteobacteria;Rhodobacterales;Rhodobacteraceae;Roseisalinus;         |
| 881 | 0 | 1 | 0 | Bacteria;Bacteroidetes;unclassified;unclassified;unclassified;unclassified;                        |
| 882 | 0 | 1 | 0 | Bacteria;Proteobacteria;Gammaproteobacteria;Chromatiales;Chromatiaceae;unclassified;               |
| 883 | 0 | 1 | 0 | Bacteria;Proteobacteria;Gammaproteobacteria;unclassified;unclassified;unclassified;                |
| 884 | 0 | 1 | 0 | Bacteria;Bacteroidetes;unclassified;unclassified;unclassified;unclassified;                        |
| 885 | 0 | 1 | 0 | Bacteria;Proteobacteria;Deltaproteobacteria;Desulfobacterales;Desulfobacteraceae;unclassified;     |
| 886 | 0 | 1 | 0 | Bacteria;Proteobacteria;Gammaproteobacteria;unclassified;unclassified;unclassified;                |
| 887 | 0 | 1 | 0 | Bacteria;Proteobacteria;Gammaproteobacteria;Chromatiales;Chromatiaceae;unclassified;               |
| 888 | 0 | 1 | 0 | Bacteria;Proteobacteria;unclassified;unclassified;unclassified;unclassified;                       |
| 889 | 0 | 1 | 0 | Bacteria;Bacteroidetes;unclassified;unclassified;unclassified;unclassified;                        |
| 890 | 0 | 1 | 0 | Bacteria;Proteobacteria;Deltaproteobacteria;Desulfobacterales;Desulfobacteraceae;unclassified;     |
| 891 | 0 | 1 | 0 | Bacteria;Proteobacteria;Gammaproteobacteria;Oceanospirillales;Alcanovoraceae;Marinicella;          |
| 892 | 0 | 1 | 0 | Bacteria;Proteobacteria;unclassified;unclassified;unclassified;unclassified;                       |
| 893 | 0 | 1 | 0 | Bacteria;Acidobacteria;Acidobacteria;Acidobacteriales;Acidobacteriaceae;Gp10                       |
| 894 | 0 | 1 | 0 | Bacteria;Proteobacteria;Deltaproteobacteria;unclassified;unclassified;unclassified;                |
| 895 | 0 | 1 | 0 | Bacteria;Bacteroidetes;unclassified;unclassified;unclassified;unclassified;                        |
| 896 | 0 | 1 | 0 | Bacteria;Proteobacteria;Gammaproteobacteria;unclassified;unclassified;unclassified;                |
| 897 | 0 | 1 | 0 | Bacteria;Acidobacteria;Acidobacteria;Acidobacteriales;Acidobacteriaceae;Gp3                        |
| 898 | 0 | 1 | 0 | Bacteria;unclassified;unclassified;unclassified;unclassified;unclassified;                         |
| 899 | 0 | 1 | 0 | Bacteria;unclassified;unclassified;unclassified;unclassified;unclassified;                         |
| 900 | 0 | 1 | 0 | Bacteria;Proteobacteria;Gammaproteobacteria;unclassified;unclassified;unclassified;                |
| 901 | 0 | 1 | 0 | Bacteria;Proteobacteria;Deltaproteobacteria;Desulfobacterales;Desulfobacteraceae;Desulfobacterium; |
| 902 | 0 | 1 | 0 | Bacteria;Actinobacteria;Actinobacteria;Actinomycetales;unclassified;unclassified;                  |
| 903 | 0 | 1 | 0 | Bacteria;Bacteroidetes;Sphingobacteria;Sphingobacteriales;unclassified;unclassified;               |
| 904 | 0 | 1 | 0 | Bacteria;Bacteroidetes;unclassified;unclassified;unclassified;unclassified;                        |
| 905 | 0 | 1 | 0 | Bacteria;Acidobacteria;Acidobacteria;Acidobacteriales;Acidobacteriaceae;Gp10                       |
| 906 | 0 | 1 | 0 | Bacteria;Proteobacteria;Alphaproteobacteria;Rhizobiales;Aurantimonadaceae;unclassified;            |
| 907 | 0 | 1 | 0 | Bacteria;unclassified;unclassified;unclassified;unclassified;unclassified;                         |
| 908 | 0 | 1 | 0 | Bacteria;unclassified;unclassified;unclassified;unclassified;unclassified;                         |
| 909 | 0 | 1 | 0 | Bacteria;Firmicutes;Clostridia;Clostridiales;unclassified;unclassified;                            |
| 910 | 0 | 1 | 0 | Bacteria;Proteobacteria;Deltaproteobacteria;unclassified;unclassified;unclassified;                |
| 911 | 0 | 1 | 0 | Bacteria;Proteobacteria;Deltaproteobacteria;unclassified;unclassified;unclassified;                |
| 912 | 0 | 1 | 0 | Bacteria;Actinobacteria;Actinobacteria;unclassified;unclassified;unclassified;                     |
| 913 | 0 | 1 | 0 | Bacteria;Firmicutes;Bacilli;Bacillales;Bacillaceae_2;unclassified;                                 |
| 914 | 0 | 1 | 0 | Bacteria;unclassified;unclassified;unclassified;unclassified;unclassified;                         |
| 915 | 0 | 1 | 0 | Bacteria;Proteobacteria;Gammaproteobacteria;unclassified;unclassified;unclassified;                |
| 916 | 0 | 1 | 0 | Bacteria;Bacteroidetes;unclassified;unclassified;unclassified;unclassified;                        |
| 917 | 0 | 1 | 0 | Bacteria;Verrucomicrobia;unclassified;unclassified;unclassified;unclassified;                      |
| 918 | 0 | 1 | 0 | Bacteria;Proteobacteria;Deltaproteobacteria;Desulfobacterales;Desulfobacteraceae;unclassified;     |
| 919 | 0 | 1 | 0 | Bacteria;Proteobacteria;Gammaproteobacteria;Xanthomonadales;Xanthomonadaceae;Luteibacter;          |

|     |   |   |   |                                                                                                  |
|-----|---|---|---|--------------------------------------------------------------------------------------------------|
| 920 | 0 | 1 | 0 | Bacteria;Proteobacteria;Gammaproteobacteria;unclassified;unclassified;unclassified;              |
| 921 | 0 | 1 | 0 | Bacteria;Acidobacteria;Acidobacteria;Acidobacteriales;Acidobacteriaceae;Gp3                      |
| 922 | 0 | 1 | 0 | Bacteria;Proteobacteria;Deltaproteobacteria;Desulfobacterales;Desulfobacteraceae;unclassified;   |
| 923 | 0 | 1 | 0 | Bacteria;Bacteroidetes;unclassified;unclassified;unclassified;unclassified;                      |
| 924 | 0 | 1 | 0 | Bacteria;unclassified;unclassified;unclassified;unclassified;unclassified;                       |
| 925 | 0 | 1 | 0 | Bacteria;Proteobacteria;Alphaproteobacteria;unclassified;unclassified;unclassified;              |
| 926 | 0 | 1 | 0 | Bacteria;Proteobacteria;Deltaproteobacteria;Desulfovibrionales;Desulfovibrionaceae;unclassified; |
| 927 | 0 | 1 | 0 | Bacteria;Proteobacteria;Deltaproteobacteria;Desulfobacterales;Desulfobacteraceae;Desulfobacter;  |
| 928 | 0 | 1 | 0 | Bacteria;Bacteroidetes;unclassified;unclassified;unclassified;unclassified;                      |
| 929 | 0 | 1 | 0 | Bacteria;Firmicutes;unclassified;unclassified;unclassified;unclassified;                         |
| 930 | 0 | 1 | 0 | Bacteria;Proteobacteria;Deltaproteobacteria;unclassified;unclassified;unclassified;              |
| 931 | 0 | 1 | 0 | Bacteria;unclassified;unclassified;unclassified;unclassified;unclassified;                       |
| 932 | 0 | 1 | 0 | Bacteria;Bacteroidetes;Flavobacteria;Flavobacteriales;Flavobacteriaceae;Gramella;                |
| 933 | 0 | 1 | 0 | Bacteria;Acidobacteria;Acidobacteria;Acidobacteriales;Acidobacteriaceae;Gp21                     |
| 934 | 0 | 1 | 0 | Bacteria;Firmicutes;Clostridia;Clostridiales;Ruminococcaceae;unclassified;                       |
| 935 | 0 | 1 | 0 | Bacteria;unclassified;unclassified;unclassified;unclassified;unclassified;                       |
| 936 | 0 | 1 | 0 | Bacteria;Proteobacteria;Gammaproteobacteria;unclassified;unclassified;unclassified;              |
| 937 | 0 | 1 | 0 | Bacteria;Acidobacteria;Acidobacteria;Acidobacteriales;Acidobacteriaceae;Gp10                     |
| 938 | 0 | 1 | 0 | Bacteria;unclassified;unclassified;unclassified;unclassified;unclassified;                       |
| 939 | 0 | 1 | 0 | Bacteria;Proteobacteria;unclassified;unclassified;unclassified;unclassified;                     |
| 940 | 0 | 1 | 0 | Bacteria;Bacteroidetes;Flavobacteria;Flavobacteriales;Flavobacteriaceae;unclassified;            |
| 941 | 0 | 1 | 0 | Bacteria;unclassified;unclassified;unclassified;unclassified;unclassified;                       |
| 942 | 0 | 1 | 0 | Bacteria;unclassified;unclassified;unclassified;unclassified;unclassified;                       |
| 943 | 0 | 1 | 0 | Bacteria;Proteobacteria;Deltaproteobacteria;Myxococcales;unclassified;unclassified;              |
| 944 | 0 | 1 | 0 | Bacteria;Proteobacteria;Deltaproteobacteria;Desulfobacterales;Desulfobacteraceae;unclassified;   |
| 945 | 0 | 1 | 0 | Bacteria;unclassified;unclassified;unclassified;unclassified;unclassified;                       |
| 946 | 0 | 1 | 0 | Bacteria;Proteobacteria;Gammaproteobacteria;unclassified;unclassified;unclassified;              |
| 947 | 0 | 1 | 0 | Bacteria;Bacteroidetes;Bacteroidia;Bacteroidales;Porphyromonadaceae;unclassified;                |
| 948 | 0 | 1 | 0 | Bacteria;Proteobacteria;Deltaproteobacteria;unclassified;unclassified;unclassified;              |
| 949 | 0 | 1 | 0 | Bacteria;Firmicutes;Clostridia;Clostridiales;unclassified;unclassified;                          |
| 950 | 0 | 1 | 0 | Bacteria;unclassified;unclassified;unclassified;unclassified;unclassified;                       |
| 951 | 0 | 1 | 0 | Bacteria;Proteobacteria;unclassified;unclassified;unclassified;unclassified;                     |
| 952 | 0 | 1 | 0 | Bacteria;Proteobacteria;Deltaproteobacteria;Desulfobacterales;Desulfobacteraceae;Desulfobacula;  |
| 953 | 0 | 1 | 0 | Bacteria;Bacteroidetes;Flavobacteria;Flavobacteriales;Cryomorphaceae;unclassified;               |
| 954 | 0 | 1 | 0 | Bacteria;Proteobacteria;unclassified;unclassified;unclassified;unclassified;                     |
| 955 | 0 | 1 | 0 | Bacteria;Proteobacteria;Gammaproteobacteria;unclassified;unclassified;unclassified;              |
| 956 | 0 | 1 | 0 | Bacteria;Bacteroidetes;unclassified;unclassified;unclassified;unclassified;                      |
| 957 | 0 | 1 | 0 | Bacteria;Proteobacteria;Deltaproteobacteria;Myxococcales;unclassified;unclassified;              |
| 958 | 0 | 1 | 0 | Bacteria;WS3;unclassified;unclassified;unclassified;unclassified;                                |
| 959 | 0 | 1 | 0 | Bacteria;unclassified;unclassified;unclassified;unclassified;unclassified;                       |
| 960 | 0 | 1 | 0 | Bacteria;unclassified;unclassified;unclassified;unclassified;unclassified;                       |
| 961 | 0 | 1 | 0 | Bacteria;Acidobacteria;Acidobacteria;Acidobacteriales;Acidobacteriaceae;Gp10                     |

|      |   |   |   |                                                                                                  |
|------|---|---|---|--------------------------------------------------------------------------------------------------|
| 962  | 0 | 1 | 0 | Bacteria;Proteobacteria;Alphaproteobacteria;Rhodobacterales;Rhodobacteraceae;unclassified;       |
| 963  | 0 | 1 | 0 | Bacteria;Proteobacteria;Deltaproteobacteria;unclassified;unclassified;unclassified;              |
| 964  | 0 | 1 | 0 | Bacteria;unclassified;unclassified;unclassified;unclassified;unclassified;                       |
| 965  | 0 | 1 | 0 | Bacteria;Firmicutes;Clostridia;Clostridiales;Lachnospiraceae;unclassified;                       |
| 966  | 0 | 1 | 0 | Bacteria;Bacteroidetes;unclassified;unclassified;unclassified;unclassified;                      |
| 967  | 0 | 1 | 0 | Bacteria;Proteobacteria;Deltaproteobacteria;Desulfobacterales;Desulfobacteraceae;unclassified;   |
| 968  | 0 | 1 | 0 | Bacteria;Proteobacteria;Gammaproteobacteria;unclassified;unclassified;unclassified;              |
| 969  | 0 | 1 | 0 | Bacteria;Firmicutes;Clostridia;Clostridiales;unclassified;unclassified;                          |
| 970  | 0 | 0 | 1 | Bacteria;Proteobacteria;Gammaproteobacteria;Enterobacteriales;Enterobacteriaceae;Serratia;       |
| 971  | 0 | 0 | 1 | Bacteria;Proteobacteria;Deltaproteobacteria;Desulfobacterales;Desulfobacteraceae;unclassified;   |
| 972  | 0 | 1 | 0 | Bacteria;Proteobacteria;Deltaproteobacteria;Desulfobacterales;Desulfobacteraceae;unclassified;   |
| 973  | 0 | 1 | 0 | Bacteria;Bacteroidetes;unclassified;unclassified;unclassified;unclassified;                      |
| 974  | 0 | 1 | 0 | Bacteria;Proteobacteria;Gammaproteobacteria;unclassified;unclassified;unclassified;              |
| 975  | 0 | 1 | 0 | Bacteria;Proteobacteria;Gammaproteobacteria;Alteromonadales;Alteromonadaceae;Marinobacterium;    |
| 976  | 0 | 1 | 0 | Bacteria;Firmicutes;Bacilli;Bacillales;Paenibacillaceae_1;unclassified;                          |
| 977  | 0 | 1 | 0 | Bacteria;Proteobacteria;Gammaproteobacteria;unclassified;unclassified;unclassified;              |
| 978  | 0 | 1 | 0 | Bacteria;Proteobacteria;Deltaproteobacteria;Desulfobacterales;Desulfobacteraceae;Desulfosarcina; |
| 979  | 0 | 1 | 0 | Bacteria;unclassified;unclassified;unclassified;unclassified;unclassified;                       |
| 980  | 0 | 1 | 0 | Bacteria;Proteobacteria;Deltaproteobacteria;unclassified;unclassified;unclassified;              |
| 981  | 0 | 1 | 0 | Bacteria;Proteobacteria;Deltaproteobacteria;Desulfobacterales;Desulfobulbaceae;Desulfopila;      |
| 982  | 0 | 1 | 0 | Bacteria;Firmicutes;Clostridia;unclassified;unclassified;unclassified;                           |
| 983  | 0 | 1 | 0 | Bacteria;Proteobacteria;Gammaproteobacteria;Cellvibrionales;Halieaceae;Congregibacter;           |
| 984  | 0 | 1 | 0 | Bacteria;Bacteroidetes;unclassified;unclassified;unclassified;unclassified;                      |
| 985  | 0 | 1 | 0 | Bacteria;unclassified;unclassified;unclassified;unclassified;unclassified;                       |
| 986  | 1 | 0 | 0 | Bacteria;Proteobacteria;unclassified;unclassified;unclassified;unclassified;                     |
| 987  | 0 | 1 | 0 | Bacteria;Bacteroidetes;unclassified;unclassified;unclassified;unclassified;                      |
| 988  | 0 | 1 | 0 | Bacteria;Bacteroidetes;unclassified;unclassified;unclassified;unclassified;                      |
| 989  | 1 | 0 | 0 | Bacteria;Proteobacteria;Alphaproteobacteria;Rhodospirillales;Rhodospirillaceae;unclassified;     |
| 990  | 1 | 0 | 0 | Bacteria;Bacteroidetes;Sphingobacteria;Sphingobacteriales;Flammeovirgaceae;Marinoscillum;        |
| 991  | 0 | 1 | 0 | Bacteria;unclassified;unclassified;unclassified;unclassified;unclassified;                       |
| 992  | 0 | 1 | 0 | Bacteria;Proteobacteria;Gammaproteobacteria;unclassified;unclassified;unclassified;              |
| 993  | 0 | 1 | 0 | Bacteria;unclassified;unclassified;unclassified;unclassified;unclassified;                       |
| 994  | 0 | 1 | 0 | Bacteria;Bacteroidetes;unclassified;unclassified;unclassified;unclassified;                      |
| 995  | 0 | 1 | 0 | Bacteria;Bacteroidetes;unclassified;unclassified;unclassified;unclassified;                      |
| 996  | 0 | 1 | 0 | Bacteria;Proteobacteria;Alphaproteobacteria;Rhodobacterales;Rhodobacteraceae;unclassified;       |
| 997  | 1 | 0 | 0 | Bacteria;Bacteroidetes;Sphingobacteria;Sphingobacteriales;unclassified;unclassified;             |
| 998  | 1 | 0 | 0 | Bacteria;Proteobacteria;Gammaproteobacteria;Salinisphaerales;Salinisphaeraeae;Salinisphaera;     |
| 999  | 1 | 0 | 0 | Bacteria;Proteobacteria;Deltaproteobacteria;Desulfuromonadales;unclassified;unclassified;        |
| 1000 | 0 | 0 | 1 | Bacteria;unclassified;unclassified;unclassified;unclassified;unclassified;                       |
| 1001 | 0 | 1 | 0 | Bacteria;Proteobacteria;Epsilonproteobacteria;Campylobacteriales;unclassified;unclassified;      |
| 1002 | 0 | 1 | 0 | Bacteria;unclassified;unclassified;unclassified;unclassified;unclassified;                       |
| 1003 | 1 | 0 | 0 | Bacteria;Proteobacteria;Alphaproteobacteria;Caulobacterales;Caulobacteraceae;Phenylobacterium;   |

|      |   |   |   |                                                                                                           |
|------|---|---|---|-----------------------------------------------------------------------------------------------------------|
| 1004 | 1 | 0 | 0 | Bacteria;unclassified;unclassified;unclassified;unclassified;unclassified;                                |
| 1005 | 0 | 0 | 1 | Bacteria;Bacteroidetes;Flavobacteria;Flavobacteriales;Flavobacteriaceae;unclassified;                     |
| 1006 | 0 | 1 | 0 | Bacteria;Proteobacteria;Gammaproteobacteria;unclassified;unclassified;unclassified;                       |
| 1007 | 0 | 0 | 1 | Bacteria;Proteobacteria;Deltaproteobacteria;Myxococcales;unclassified;unclassified;                       |
| 1008 | 0 | 1 | 0 | Bacteria;unclassified;unclassified;unclassified;unclassified;unclassified;                                |
| 1009 | 0 | 0 | 1 | Bacteria;unclassified;unclassified;unclassified;unclassified;unclassified;                                |
| 1010 | 0 | 1 | 0 | Bacteria;Verrucomicrobia;Opitutae;unclassified;unclassified;unclassified;                                 |
| 1011 | 0 | 1 | 0 | Bacteria;unclassified;unclassified;unclassified;unclassified;unclassified;                                |
| 1012 | 0 | 0 | 1 | Bacteria;unclassified;unclassified;unclassified;unclassified;unclassified;                                |
| 1013 | 0 | 0 | 1 | Bacteria;Acidobacteria;Holophagae;Acanthopleuribacteriales;Acanthopleuribacteriaceae;Acanthopleuribacter; |
| 1014 | 0 | 0 | 1 | Bacteria;Proteobacteria;Epsilonproteobacteria;Campylobacteriales;unclassified;unclassified;               |
| 1015 | 0 | 0 | 1 | Bacteria;Proteobacteria;Gammaproteobacteria;Xanthomonadales;Sinobacteriaceae;Steroidobacter;              |
| 1016 | 0 | 1 | 0 | Bacteria;Proteobacteria;Gammaproteobacteria;Chromatiales;Chromatiaceae;unclassified;                      |
| 1017 | 0 | 1 | 0 | Bacteria;Bacteroidetes;unclassified;unclassified;unclassified;unclassified;                               |
| 1018 | 0 | 0 | 1 | Bacteria;Proteobacteria;Alphaproteobacteria;unclassified;unclassified;unclassified;                       |
| 1019 | 0 | 0 | 1 | Bacteria;Acidobacteria;Acidobacteria;Acidobacteriales;Acidobacteriaceae;Gp10                              |
| 1020 | 0 | 1 | 0 | Bacteria;Firmicutes;Clostridia;Clostridiales;unclassified;unclassified;                                   |
| 1021 | 0 | 1 | 0 | Bacteria;Bacteroidetes;unclassified;unclassified;unclassified;unclassified;                               |
| 1022 | 0 | 0 | 1 | Bacteria;unclassified;unclassified;unclassified;unclassified;unclassified;                                |
| 1023 | 0 | 1 | 0 | Bacteria;Proteobacteria;Deltaproteobacteria;Desulfobacteriales;Desulfobacteriaceae;unclassified;          |
| 1024 | 0 | 0 | 1 | Bacteria;Proteobacteria;Deltaproteobacteria;Desulfobacteriales;Desulfobacteriaceae;unclassified;          |
| 1025 | 0 | 1 | 0 | Bacteria;Proteobacteria;unclassified;unclassified;unclassified;unclassified;                              |
| 1026 | 0 | 0 | 1 | Bacteria;Proteobacteria;Gammaproteobacteria;Chromatiales;unclassified;unclassified;                       |
| 1027 | 0 | 0 | 1 | Bacteria;Proteobacteria;Betaproteobacteria;Burkholderiales;unclassified;unclassified;                     |
| 1028 | 0 | 0 | 1 | Bacteria;unclassified;unclassified;unclassified;unclassified;unclassified;                                |
| 1029 | 0 | 0 | 1 | Bacteria;Bacteroidetes;unclassified;unclassified;unclassified;unclassified;                               |
| 1030 | 0 | 0 | 1 | Bacteria;Proteobacteria;unclassified;unclassified;unclassified;unclassified;                              |
| 1031 | 0 | 1 | 0 | Bacteria;Bacteroidetes;unclassified;unclassified;unclassified;unclassified;                               |
| 1032 | 0 | 0 | 1 | Bacteria;Proteobacteria;Gammaproteobacteria;unclassified;unclassified;unclassified;                       |
| 1033 | 0 | 1 | 0 | Bacteria;unclassified;unclassified;unclassified;unclassified;unclassified;                                |
| 1034 | 0 | 1 | 0 | Bacteria;unclassified;unclassified;unclassified;unclassified;unclassified;                                |
| 1035 | 0 | 0 | 1 | Bacteria;Bacteroidetes;Flavobacteria;Flavobacteriales;unclassified;unclassified;                          |
| 1036 | 0 | 0 | 1 | Bacteria;unclassified;unclassified;unclassified;unclassified;unclassified;                                |
| 1037 | 0 | 1 | 0 | Bacteria;Bacteroidetes;unclassified;unclassified;unclassified;unclassified;                               |
| 1038 | 0 | 1 | 0 | Bacteria;unclassified;unclassified;unclassified;unclassified;unclassified;                                |
| 1039 | 0 | 0 | 1 | Bacteria;unclassified;unclassified;unclassified;unclassified;unclassified;                                |
| 1040 | 0 | 0 | 1 | Bacteria;Proteobacteria;Deltaproteobacteria;unclassified;unclassified;unclassified;                       |
| 1041 | 0 | 1 | 0 | Bacteria;Bacteroidetes;Sphingobacteria;Sphingobacteriales;unclassified;unclassified;                      |
| 1042 | 0 | 1 | 0 | Bacteria;Bacteroidetes;unclassified;unclassified;unclassified;unclassified;                               |
| 1043 | 0 | 1 | 0 | Bacteria;unclassified;unclassified;unclassified;unclassified;unclassified;                                |
| 1044 | 0 | 0 | 1 | Bacteria;Proteobacteria;Deltaproteobacteria;Desulfuromonadales;unclassified;unclassified;                 |
| 1045 | 0 | 1 | 0 | Bacteria;Proteobacteria;Gammaproteobacteria;unclassified;unclassified;unclassified;                       |

|      |   |   |   |                                                                                                    |
|------|---|---|---|----------------------------------------------------------------------------------------------------|
| 1046 | 0 | 1 | 0 | Bacteria;Bacteroidetes;unclassified;unclassified;unclassified;unclassified;                        |
| 1047 | 0 | 1 | 0 | Bacteria;unclassified;unclassified;unclassified;unclassified;unclassified;                         |
| 1048 | 0 | 1 | 0 | Bacteria;unclassified;unclassified;unclassified;unclassified;unclassified;                         |
| 1049 | 0 | 0 | 1 | Bacteria;unclassified;unclassified;unclassified;unclassified;unclassified;                         |
| 1050 | 0 | 0 | 1 | Bacteria;Proteobacteria;unclassified;unclassified;unclassified;unclassified;                       |
| 1051 | 0 | 0 | 1 | Bacteria;unclassified;unclassified;unclassified;unclassified;unclassified;                         |
| 1052 | 0 | 0 | 1 | Bacteria;Proteobacteria;Gammaproteobacteria;Alteromonadales;unclassified;unclassified;             |
| 1053 | 0 | 0 | 1 | Bacteria;Proteobacteria;Gammaproteobacteria;unclassified;unclassified;unclassified;                |
| 1054 | 0 | 0 | 1 | Bacteria;Bacteroidetes;unclassified;unclassified;unclassified;unclassified;                        |
| 1055 | 0 | 1 | 0 | Bacteria;Acidobacteria;Acidobacteria;Acidobacteriales;Acidobacteriaceae;Gp10                       |
| 1056 | 0 | 0 | 1 | Bacteria;unclassified;unclassified;unclassified;unclassified;unclassified;                         |
| 1057 | 0 | 0 | 1 | Bacteria;Bacteroidetes;unclassified;unclassified;unclassified;unclassified;                        |
| 1058 | 0 | 0 | 1 | Bacteria;Bacteroidetes;unclassified;unclassified;unclassified;unclassified;                        |
| 1059 | 0 | 0 | 1 | Bacteria;Bacteroidetes;unclassified;unclassified;unclassified;unclassified;                        |
| 1060 | 0 | 0 | 1 | Bacteria;Bacteroidetes;Flavobacteria;Flavobacteriales;Flavobacteriaceae;unclassified;              |
| 1061 | 0 | 1 | 0 | Bacteria;Proteobacteria;Deltaproteobacteria;Desulfobacterales;Desulfobacteraceae;Desulfobacterium; |
| 1062 | 0 | 0 | 1 | Bacteria;Proteobacteria;Gammaproteobacteria;unclassified;unclassified;unclassified;                |
| 1063 | 0 | 0 | 1 | Bacteria;unclassified;unclassified;unclassified;unclassified;unclassified;                         |
| 1064 | 0 | 0 | 1 | Bacteria;Proteobacteria;Deltaproteobacteria;Bdellovibrionales;Bacteriovoraceae;Bacteriovorax;      |
| 1065 | 0 | 0 | 1 | Bacteria;Proteobacteria;Gammaproteobacteria;Xanthomonadales;Xanthomonadaceae;Rhodanobacter;        |
| 1066 | 0 | 1 | 0 | Bacteria;Proteobacteria;unclassified;unclassified;unclassified;unclassified;                       |
| 1067 | 0 | 1 | 0 | Bacteria;Proteobacteria;Gammaproteobacteria;unclassified;unclassified;unclassified;                |
| 1068 | 0 | 0 | 1 | Bacteria;unclassified;unclassified;unclassified;unclassified;unclassified;                         |
| 1069 | 0 | 0 | 1 | Bacteria;unclassified;unclassified;unclassified;unclassified;unclassified;                         |
| 1070 | 0 | 0 | 1 | Bacteria;Bacteroidetes;Bacteroidia;Bacteroidales;unclassified;unclassified;                        |
| 1071 | 0 | 0 | 1 | Bacteria;Proteobacteria;unclassified;unclassified;unclassified;unclassified;                       |
| 1072 | 0 | 1 | 0 | Bacteria;Firmicutes;unclassified;unclassified;unclassified;unclassified;                           |
| 1073 | 0 | 1 | 0 | Bacteria;unclassified;unclassified;unclassified;unclassified;unclassified;                         |
| 1074 | 0 | 0 | 1 | Bacteria;Proteobacteria;Gammaproteobacteria;Oceanospirillales;Halomonadaceae;Halomonas;            |
| 1075 | 0 | 1 | 0 | Bacteria;Proteobacteria;Gammaproteobacteria;unclassified;unclassified;unclassified;                |
| 1076 | 0 | 0 | 1 | Bacteria;Bacteroidetes;unclassified;unclassified;unclassified;unclassified;                        |
| 1077 | 0 | 1 | 0 | Bacteria;Proteobacteria;Deltaproteobacteria;Desulfobacterales;Desulfobacteraceae;Desulfobacter;    |
| 1078 | 0 | 0 | 1 | Bacteria;Proteobacteria;Deltaproteobacteria;Desulfobacterales;Desulfobulbaceae;unclassified;       |
| 1079 | 0 | 0 | 1 | Bacteria;Proteobacteria;Deltaproteobacteria;Desulfobacterales;Desulfobacteraceae;unclassified;     |
| 1080 | 0 | 0 | 1 | Bacteria;Proteobacteria;Alphaproteobacteria;Rhodobacterales;Rhodobacteraceae;unclassified;         |
| 1081 | 0 | 1 | 0 | Bacteria;unclassified;unclassified;unclassified;unclassified;unclassified;                         |
| 1082 | 0 | 1 | 0 | Bacteria;Proteobacteria;Deltaproteobacteria;Desulfobacterales;Desulfobacteraceae;Desulfobacula;    |
| 1083 | 1 | 0 | 0 | Bacteria;Proteobacteria;Gammaproteobacteria;unclassified;unclassified;unclassified;                |
| 1084 | 1 | 0 | 0 | Bacteria;Proteobacteria;Betaproteobacteria;Burkholderiales;Oxalobacteraceae;unclassified;          |
| 1085 | 0 | 1 | 0 | Bacteria;Proteobacteria;Gammaproteobacteria;unclassified;unclassified;unclassified;                |
| 1086 | 1 | 0 | 0 | Bacteria;Proteobacteria;Deltaproteobacteria;unclassified;unclassified;unclassified;                |
| 1087 | 0 | 1 | 0 | Bacteria;Proteobacteria;Gammaproteobacteria;unclassified;unclassified;unclassified;                |

|      |   |   |   |                                                                                                  |
|------|---|---|---|--------------------------------------------------------------------------------------------------|
| 1088 | 1 | 0 | 0 | Bacteria;Proteobacteria;Gammaproteobacteria;Pseudomonadales;Moraxellaceae;Acinetobacter;         |
| 1089 | 0 | 1 | 0 | Bacteria;Bacteroidetes;unclassified;unclassified;unclassified;unclassified;                      |
| 1090 | 1 | 0 | 0 | Bacteria;Proteobacteria;unclassified;unclassified;unclassified;unclassified;                     |
| 1091 | 1 | 0 | 0 | Bacteria;Bacteroidetes;Sphingobacteria;Sphingobacteriales;Saprospiraceae;Lewinella;              |
| 1092 | 1 | 0 | 0 | Bacteria;Proteobacteria;unclassified;unclassified;unclassified;unclassified;                     |
| 1093 | 1 | 0 | 0 | Bacteria;Proteobacteria;Alphaproteobacteria;Rhodobacterales;Rhodobacteraceae;unclassified;       |
| 1094 | 1 | 0 | 0 | Bacteria;Proteobacteria;Gammaproteobacteria;Alteromonadales;Alteromonadaceae;Marinobacter;       |
| 1095 | 1 | 0 | 0 | Bacteria;Proteobacteria;Alphaproteobacteria;Rhodobacterales;Rhodobacteraceae;unclassified;       |
| 1096 | 0 | 1 | 0 | Bacteria;unclassified;unclassified;unclassified;unclassified;unclassified;                       |
| 1097 | 1 | 0 | 0 | Bacteria;Proteobacteria;Alphaproteobacteria;unclassified;unclassified;unclassified;              |
| 1098 | 1 | 0 | 0 | Bacteria;Proteobacteria;Deltaproteobacteria;Myxococcales;unclassified;unclassified;              |
| 1099 | 0 | 1 | 0 | Bacteria;Bacteroidetes;Flavobacteria;Flavobacteriales;Flavobacteriaceae;Salinimicrobium;         |
| 1100 | 1 | 0 | 0 | Bacteria;Proteobacteria;Gammaproteobacteria;unclassified;unclassified;unclassified;              |
| 1101 | 0 | 1 | 0 | Bacteria;Acidobacteria;Acidobacteria;Acidobacteriales;Acidobacteriaceae;Gp21                     |
| 1102 | 0 | 1 | 0 | Bacteria;unclassified;unclassified;unclassified;unclassified;unclassified;                       |
| 1103 | 1 | 0 | 0 | Bacteria;Proteobacteria;Gammaproteobacteria;unclassified;unclassified;unclassified;              |
| 1104 | 1 | 0 | 0 | Bacteria;Proteobacteria;Alphaproteobacteria;Rhodobacterales;Rhodobacteraceae;unclassified;       |
| 1105 | 0 | 1 | 0 | Bacteria;Bacteroidetes;unclassified;unclassified;unclassified;unclassified;                      |
| 1106 | 0 | 1 | 0 | Bacteria;Proteobacteria;Alphaproteobacteria;Rhodobacterales;Rhodobacteraceae;unclassified;       |
| 1107 | 0 | 1 | 0 | Bacteria;Bacteroidetes;unclassified;unclassified;unclassified;unclassified;                      |
| 1108 | 1 | 0 | 0 | Bacteria;Bacteroidetes;Flavobacteria;Flavobacteriales;Flavobacteriaceae;Chryseobacterium;        |
| 1109 | 1 | 0 | 0 | Bacteria;Bacteroidetes;Sphingobacteria;Sphingobacteriales;unclassified;unclassified;             |
| 1110 | 1 | 0 | 0 | Bacteria;Proteobacteria;Gammaproteobacteria;Pseudomonadales;Moraxellaceae;unclassified;          |
| 1111 | 1 | 0 | 0 | Bacteria;Proteobacteria;Gammaproteobacteria;Alteromonadales;unclassified;unclassified;           |
| 1112 | 0 | 1 | 0 | Bacteria;unclassified;unclassified;unclassified;unclassified;unclassified;                       |
| 1113 | 1 | 0 | 0 | Bacteria;Bacteroidetes;Flavobacteria;Flavobacteriales;Flavobacteriaceae;unclassified;            |
| 1114 | 0 | 1 | 0 | Bacteria;Proteobacteria;Gammaproteobacteria;unclassified;unclassified;unclassified;              |
| 1115 | 0 | 1 | 0 | Bacteria;Proteobacteria;Gammaproteobacteria;unclassified;unclassified;unclassified;              |
| 1116 | 1 | 0 | 0 | Bacteria;Proteobacteria;Betaproteobacteria;Burkholderiales;Comamonadaceae;unclassified;          |
| 1117 | 1 | 0 | 0 | Bacteria;Proteobacteria;Betaproteobacteria;Burkholderiales;Oxalobacteraceae;Herminiimonas;       |
| 1118 | 0 | 1 | 0 | Bacteria;Proteobacteria;Deltaproteobacteria;Desulfobacteriales;Desulfobacteraceae;Desulfobacula; |
| 1119 | 1 | 0 | 0 | Bacteria;Proteobacteria;Deltaproteobacteria;unclassified;unclassified;unclassified;              |
| 1120 | 1 | 0 | 0 | Bacteria;Proteobacteria;Betaproteobacteria;Burkholderiales;Alcaligenaceae;Achromobacter;         |
| 1121 | 1 | 0 | 0 | Bacteria;unclassified;unclassified;unclassified;unclassified;unclassified;                       |
| 1122 | 0 | 1 | 0 | Bacteria;unclassified;unclassified;unclassified;unclassified;unclassified;                       |
| 1123 | 1 | 0 | 0 | Bacteria;Proteobacteria;Gammaproteobacteria;Alteromonadales;Shewanellaceae;Shewanella;           |
| 1124 | 0 | 1 | 0 | Bacteria;unclassified;unclassified;unclassified;unclassified;unclassified;                       |
| 1125 | 1 | 0 | 0 | Bacteria;Proteobacteria;Alphaproteobacteria;Rhodobacterales;Rhodobacteraceae;unclassified;       |
| 1126 | 1 | 0 | 0 | Bacteria;Proteobacteria;Deltaproteobacteria;Desulfuromonadales;unclassified;unclassified;        |
| 1127 | 0 | 1 | 0 | Bacteria;Proteobacteria;Alphaproteobacteria;Rhodobacterales;Rhodobacteraceae;unclassified;       |
| 1128 | 0 | 1 | 0 | Bacteria;unclassified;unclassified;unclassified;unclassified;unclassified;                       |
| 1129 | 0 | 1 | 0 | Bacteria;unclassified;unclassified;unclassified;unclassified;unclassified;                       |

|      |   |   |   |                                                                                                    |
|------|---|---|---|----------------------------------------------------------------------------------------------------|
| 1130 | 1 | 0 | 0 | Bacteria;Proteobacteria;Betaproteobacteria;Burkholderiales;Comamonadaceae;Variovorax;              |
| 1131 | 1 | 0 | 0 | Bacteria;Proteobacteria;Deltaproteobacteria;unclassified;unclassified;unclassified;                |
| 1132 | 0 | 1 | 0 | Bacteria;unclassified;unclassified;unclassified;unclassified;unclassified;                         |
| 1133 | 1 | 0 | 0 | Bacteria;Bacteroidetes;Flavobacteria;Flavobacteriales;Flavobacteriaceae;unclassified;              |
| 1134 | 1 | 0 | 0 | Bacteria;Proteobacteria;Betaproteobacteria;Burkholderiales;Oxalobacteraceae;Herminiiimonas;        |
| 1135 | 1 | 0 | 0 | Bacteria;Proteobacteria;Gammaproteobacteria;Alteromonadales;Pseudoalteromonadaceae;Algicola;       |
| 1136 | 1 | 0 | 0 | Bacteria;Proteobacteria;Gammaproteobacteria;unclassified;unclassified;unclassified;                |
| 1137 | 1 | 0 | 0 | Bacteria;Proteobacteria;Gammaproteobacteria;unclassified;unclassified;unclassified;                |
| 1138 | 1 | 0 | 0 | Bacteria;Proteobacteria;Betaproteobacteria;Burkholderiales;Burkholderiaceae;Polynucleobacter;      |
| 1139 | 0 | 1 | 0 | Bacteria;unclassified;unclassified;unclassified;unclassified;unclassified;                         |
| 1140 | 1 | 0 | 0 | Bacteria;Verrucomicrobia;Verrucomicrobiae;Verrucomicrobiales;unclassified;unclassified;            |
| 1141 | 0 | 1 | 0 | Bacteria;Proteobacteria;Gammaproteobacteria;unclassified;unclassified;unclassified;                |
| 1142 | 1 | 0 | 0 | Bacteria;Firmicutes;Bacilli;Bacillales;Alicyclobacillaceae;Alicyclobacillus;                       |
| 1143 | 0 | 1 | 0 | Bacteria;Proteobacteria;Gammaproteobacteria;Oceanospirillales;Halomonadaceae;Halomonas;            |
| 1144 | 0 | 1 | 0 | Bacteria;Firmicutes;Clostridia;Clostridiales;Clostridiaceae_1;unclassified;                        |
| 1145 | 0 | 1 | 0 | Bacteria;Firmicutes;unclassified;unclassified;unclassified;unclassified;                           |
| 1146 | 1 | 0 | 0 | Bacteria;Actinobacteria;Actinobacteria;Actinomycetales;Micrococcaceae;Arthrobacter;                |
| 1147 | 1 | 0 | 0 | Bacteria;Bacteroidetes;unclassified;unclassified;unclassified;unclassified;                        |
| 1148 | 1 | 0 | 0 | Bacteria;Proteobacteria;Gammaproteobacteria;Vibrionales;Vibrionaceae;Vibrio;                       |
| 1149 | 1 | 0 | 0 | Bacteria;Proteobacteria;Gammaproteobacteria;unclassified;unclassified;unclassified;                |
| 1150 | 0 | 1 | 0 | Bacteria;Proteobacteria;Alphaproteobacteria;unclassified;unclassified;unclassified;                |
| 1151 | 0 | 1 | 0 | Bacteria;Bacteroidetes;unclassified;unclassified;unclassified;unclassified;                        |
| 1152 | 1 | 0 | 0 | Bacteria;Proteobacteria;Gammaproteobacteria;Thiotrichales;Francisellaceae;Francisella;             |
| 1153 | 1 | 0 | 0 | Bacteria;Proteobacteria;Gammaproteobacteria;unclassified;unclassified;unclassified;                |
| 1154 | 1 | 0 | 0 | Bacteria;unclassified;unclassified;unclassified;unclassified;unclassified;                         |
| 1155 | 1 | 0 | 0 | Bacteria;Proteobacteria;Alphaproteobacteria;Caulobacterales;Caulobacteraceae;Brevundimonas;        |
| 1156 | 1 | 0 | 0 | Bacteria;unclassified;unclassified;unclassified;unclassified;unclassified;                         |
| 1157 | 0 | 1 | 0 | Bacteria;unclassified;unclassified;unclassified;unclassified;unclassified;                         |
| 1158 | 1 | 0 | 0 | Bacteria;Proteobacteria;unclassified;unclassified;unclassified;unclassified;                       |
| 1159 | 0 | 1 | 0 | Bacteria;Proteobacteria;Gammaproteobacteria;unclassified;unclassified;unclassified;                |
| 1160 | 0 | 1 | 0 | Bacteria;unclassified;unclassified;unclassified;unclassified;unclassified;                         |
| 1161 | 1 | 0 | 0 | Bacteria;Verrucomicrobia;Verrucomicrobiae;Verrucomicrobiales;Verrucomicrobiaceae;unclassified;     |
| 1162 | 0 | 1 | 0 | Bacteria;Proteobacteria;Betaproteobacteria;Burkholderiales;unclassified;unclassified;              |
| 1163 | 1 | 0 | 0 | Bacteria;Proteobacteria;Alphaproteobacteria;unclassified;unclassified;unclassified;                |
| 1164 | 1 | 0 | 0 | Bacteria;Proteobacteria;Alphaproteobacteria;Rhodobacterales;Rhodobacteraceae;Loktanella;           |
| 1165 | 0 | 1 | 0 | Bacteria;Bacteroidetes;unclassified;unclassified;unclassified;unclassified;                        |
| 1166 | 0 | 0 | 1 | Bacteria;Proteobacteria;Deltaproteobacteria;Desulfobacterales;Desulfobacteraceae;Desulfobacterium; |
| 1167 | 1 | 0 | 0 | Bacteria;Bacteroidetes;Flavobacteria;Flavobacteriales;Flavobacteriaceae;Flavobacterium;            |
| 1168 | 1 | 0 | 0 | Bacteria;Firmicutes;Clostridia;Clostridiales;Clostridiaceae_1;Clostridium_sensu_stricto;           |
| 1169 | 1 | 0 | 0 | Bacteria;Proteobacteria;unclassified;unclassified;unclassified;unclassified;                       |
| 1170 | 1 | 0 | 0 | Bacteria;Proteobacteria;Gammaproteobacteria;Alteromonadales;Colwelliaceae;Thalassomonas;           |
| 1171 | 0 | 1 | 0 | Bacteria;Proteobacteria;Deltaproteobacteria;Desulfobacterales;Desulfobacteraceae;unclassified;     |

|      |   |   |   |                                                                                                          |
|------|---|---|---|----------------------------------------------------------------------------------------------------------|
| 1172 | 0 | 0 | 1 | Bacteria;Acidobacteria;Acidobacteria;Acidobacteriales;Acidobacteriaceae;Gp4                              |
| 1173 | 0 | 0 | 1 | Bacteria;Proteobacteria;Deltaproteobacteria;unclassified;unclassified;unclassified;                      |
| 1174 | 0 | 0 | 1 | Bacteria;Proteobacteria;Alphaproteobacteria;Rhodobacterales;Rhodobacteraceae;unclassified;               |
| 1175 | 0 | 1 | 0 | Bacteria;Proteobacteria;Deltaproteobacteria;Desulfobacterales;Desulfobulbaceae;unclassified;             |
| 1176 | 0 | 0 | 1 | Bacteria;Bacteroidetes;unclassified;unclassified;unclassified;unclassified;                              |
| 1177 | 0 | 1 | 0 | Bacteria;Proteobacteria;Gammaproteobacteria;unclassified;unclassified;unclassified;                      |
| 1178 | 0 | 0 | 1 | Bacteria;Proteobacteria;Alphaproteobacteria;unclassified;unclassified;unclassified;                      |
| 1179 | 0 | 0 | 1 | Bacteria;unclassified;unclassified;unclassified;unclassified;unclassified;                               |
| 1180 | 0 | 0 | 1 | Bacteria;unclassified;unclassified;unclassified;unclassified;unclassified;                               |
| 1181 | 0 | 1 | 0 | Bacteria;WS3;unclassified;unclassified;unclassified;unclassified;                                        |
| 1182 | 0 | 0 | 1 | Bacteria;Proteobacteria;Alphaproteobacteria;Caulobacterales;Hyphomonadaceae;unclassified;                |
| 1183 | 0 | 1 | 0 | Bacteria;Firmicutes;Clostridia;Clostridiales;Eubacteriaceae;Alkalibacter;                                |
| 1184 | 0 | 1 | 0 | Bacteria;Bacteroidetes;unclassified;unclassified;unclassified;unclassified;                              |
| 1185 | 0 | 0 | 1 | Bacteria;Proteobacteria;Gammaproteobacteria;unclassified;unclassified;unclassified;                      |
| 1186 | 0 | 1 | 0 | Bacteria;Acidobacteria;Acidobacteria;Acidobacteriales;Acidobacteriaceae;Gp10                             |
| 1187 | 0 | 0 | 1 | Bacteria;Proteobacteria;Deltaproteobacteria;Desulfobacterales;Desulfobulbaceae;unclassified;             |
| 1188 | 0 | 0 | 1 | Bacteria;Proteobacteria;Gammaproteobacteria;unclassified;unclassified;unclassified;                      |
| 1189 | 0 | 0 | 1 | Bacteria;Proteobacteria;Epsilonproteobacteria;Campylobacterales;unclassified;unclassified;               |
| 1190 | 0 | 0 | 1 | Bacteria;Proteobacteria;Gammaproteobacteria;Vibrionales;Vibrionaceae;unclassified;                       |
| 1191 | 0 | 1 | 0 | Bacteria;unclassified;unclassified;unclassified;unclassified;unclassified;                               |
| 1192 | 0 | 1 | 0 | Bacteria;unclassified;unclassified;unclassified;unclassified;unclassified;                               |
| 1193 | 0 | 0 | 1 | Bacteria;Bacteroidetes;unclassified;unclassified;unclassified;unclassified;                              |
| 1194 | 0 | 0 | 1 | Bacteria;Acidobacteria;unclassified;unclassified;unclassified;unclassified;                              |
| 1195 | 0 | 1 | 0 | Bacteria;Bacteroidetes;unclassified;unclassified;unclassified;unclassified;                              |
| 1196 | 0 | 0 | 1 | Bacteria;Proteobacteria;Gammaproteobacteria;unclassified;unclassified;unclassified;                      |
| 1197 | 0 | 1 | 0 | Bacteria;Firmicutes;unclassified;unclassified;unclassified;unclassified;                                 |
| 1198 | 0 | 0 | 1 | Bacteria;Proteobacteria;Gammaproteobacteria;unclassified;unclassified;unclassified;                      |
| 1199 | 0 | 0 | 1 | Bacteria;Proteobacteria;Gammaproteobacteria;unclassified;unclassified;unclassified;                      |
| 1200 | 0 | 1 | 0 | Bacteria;Proteobacteria;Gammaproteobacteria;unclassified;unclassified;unclassified;                      |
| 1201 | 0 | 1 | 0 | Bacteria;Bacteroidetes;unclassified;unclassified;unclassified;unclassified;                              |
| 1202 | 0 | 0 | 1 | Bacteria;Firmicutes;Clostridia;Clostridiales;Gracilibacteraceae;Gracilibacter;                           |
| 1203 | 0 | 1 | 0 | Bacteria;Proteobacteria;Deltaproteobacteria;Desulfobacterales;Desulfobacteraceae;unclassified;           |
| 1204 | 0 | 0 | 1 | Bacteria;Proteobacteria;Gammaproteobacteria;unclassified;unclassified;unclassified;                      |
| 1205 | 0 | 1 | 0 | Bacteria;Proteobacteria;Gammaproteobacteria;unclassified;unclassified;unclassified;                      |
| 1206 | 0 | 0 | 1 | Bacteria;Proteobacteria;Gammaproteobacteria;unclassified;unclassified;unclassified;                      |
| 1207 | 0 | 0 | 1 | Bacteria;Proteobacteria;Gammaproteobacteria;Enterobacteriales;Enterobacteriaceae;Escherichia_Shigella;   |
| 1208 | 0 | 1 | 0 | Bacteria;unclassified;unclassified;unclassified;unclassified;unclassified;                               |
| 1209 | 0 | 0 | 1 | Bacteria;Acidobacteria;Holophagae;Acanthopleuribacteriales;Acanthopleuribacteraceae;Acanthopleuribacter; |
| 1210 | 0 | 0 | 1 | Bacteria;unclassified;unclassified;unclassified;unclassified;unclassified;                               |
| 1211 | 0 | 0 | 1 | Bacteria;Proteobacteria;Gammaproteobacteria;unclassified;unclassified;unclassified;                      |
| 1212 | 0 | 0 | 1 | Bacteria;Bacteroidetes;unclassified;unclassified;unclassified;unclassified;                              |
| 1213 | 0 | 0 | 1 | Bacteria;Proteobacteria;Alphaproteobacteria;Rhodospirillales;unclassified;unclassified;                  |



|      |   |   |   |                                                                                                   |
|------|---|---|---|---------------------------------------------------------------------------------------------------|
| 1214 | 0 | 0 | 1 | Bacteria;Proteobacteria;Gammaproteobacteria;unclassified;unclassified;unclassified;               |
| 1215 | 0 | 0 | 1 | Bacteria;Firmicutes;Clostridia;Clostridiales;Ruminococcaceae;unclassified;                        |
| 1216 | 0 | 1 | 0 | Bacteria;Firmicutes;Bacilli;Lactobacillales;Carnobacteriaceae;Alkalibacterium;                    |
| 1217 | 0 | 1 | 0 | Bacteria;Proteobacteria;unclassified;unclassified;unclassified;unclassified;                      |
| 1218 | 0 | 0 | 1 | Bacteria;unclassified;unclassified;unclassified;unclassified;unclassified;                        |
| 1219 | 0 | 0 | 1 | Bacteria;unclassified;unclassified;unclassified;unclassified;unclassified;                        |
| 1220 | 0 | 1 | 0 | Bacteria;Bacteroidetes;Sphingobacteria;Sphingobacteriales;Flammeovirgaceae;Fulvivirga;            |
| 1221 | 0 | 0 | 1 | Bacteria;Proteobacteria;unclassified;unclassified;unclassified;unclassified;                      |
| 1222 | 0 | 1 | 0 | Bacteria;Firmicutes;Erysipelotrichia;Erysipelotrichales;Erysipelotrichaceae;unclassified;         |
| 1223 | 0 | 1 | 0 | Bacteria;Proteobacteria;unclassified;unclassified;unclassified;unclassified;                      |
| 1224 | 0 | 1 | 0 | Bacteria;Proteobacteria;Deltaproteobacteria;Desulfobacterales;Desulfobacteraceae;unclassified;    |
| 1225 | 0 | 1 | 0 | Bacteria;unclassified;unclassified;unclassified;unclassified;unclassified;                        |
| 1226 | 0 | 0 | 1 | Bacteria;Proteobacteria;Gammaproteobacteria;unclassified;unclassified;unclassified;               |
| 1227 | 0 | 0 | 1 | Bacteria;Proteobacteria;unclassified;unclassified;unclassified;unclassified;                      |
| 1228 | 0 | 1 | 0 | Bacteria;Proteobacteria;Gammaproteobacteria;unclassified;unclassified;unclassified;               |
| 1229 | 0 | 1 | 0 | Bacteria;Proteobacteria;Gammaproteobacteria;unclassified;unclassified;unclassified;               |
| 1230 | 0 | 0 | 1 | Bacteria;Proteobacteria;Gammaproteobacteria;unclassified;unclassified;unclassified;               |
| 1231 | 0 | 0 | 1 | Bacteria;Proteobacteria;Deltaproteobacteria;Desulfovibrionales;Desulfovibrionaceae;Desulfovibrio; |
| 1232 | 0 | 0 | 1 | Bacteria;Proteobacteria;Gammaproteobacteria;unclassified;unclassified;unclassified;               |
| 1233 | 0 | 1 | 0 | Bacteria;Proteobacteria;Deltaproteobacteria;Desulfuromonadales;unclassified;unclassified;         |
| 1234 | 0 | 1 | 0 | Bacteria;Bacteroidetes;Flavobacteria;Flavobacteriales;unclassified;unclassified;                  |
| 1235 | 0 | 0 | 1 | Bacteria;unclassified;unclassified;unclassified;unclassified;unclassified;                        |
| 1236 | 0 | 1 | 0 | Bacteria;Proteobacteria;Deltaproteobacteria;Desulfobacterales;unclassified;unclassified;          |
| 1237 | 0 | 0 | 1 | Bacteria;unclassified;unclassified;unclassified;unclassified;unclassified;                        |
| 1238 | 0 | 1 | 0 | Bacteria;Proteobacteria;Deltaproteobacteria;Desulfobacterales;Desulfobacteraceae;unclassified;    |
| 1239 | 0 | 0 | 1 | Bacteria;Proteobacteria;Alphaproteobacteria;Rhodobacterales;Rhodobacteraceae;unclassified;        |
| 1240 | 0 | 0 | 1 | Bacteria;Proteobacteria;Deltaproteobacteria;Desulfobacterales;Desulfobacteraceae;Desulfosarcina;  |
| 1241 | 0 | 0 | 1 | Bacteria;Proteobacteria;Gammaproteobacteria;unclassified;unclassified;unclassified;               |
| 1242 | 0 | 1 | 0 | Bacteria;Proteobacteria;Epsilonproteobacteria;Campylobacteriales;Helicobacteraceae;Sulfurovum;    |
| 1243 | 0 | 0 | 1 | Bacteria;Proteobacteria;Deltaproteobacteria;unclassified;unclassified;unclassified;               |
| 1244 | 0 | 0 | 1 | Bacteria;Proteobacteria;unclassified;unclassified;unclassified;unclassified;                      |
| 1245 | 0 | 1 | 0 | Bacteria;Proteobacteria;Deltaproteobacteria;Desulfobacterales;Desulfobulbaceae;Desulfobulbus;     |
| 1246 | 0 | 1 | 0 | Bacteria;Firmicutes;unclassified;unclassified;unclassified;unclassified;                          |
| 1247 | 0 | 1 | 0 | Bacteria;unclassified;unclassified;unclassified;unclassified;unclassified;                        |
| 1248 | 0 | 0 | 1 | Bacteria;Proteobacteria;Gammaproteobacteria;Oceanospirillales;Oceanospirillaceae;unclassified;    |
| 1249 | 0 | 0 | 1 | Bacteria;Acidobacteria;Acidobacteria;Acidobacteriales;Acidobacteriaceae;Gp9                       |
| 1250 | 0 | 1 | 0 | Bacteria;Proteobacteria;Gammaproteobacteria;unclassified;unclassified;unclassified;               |
| 1251 | 0 | 0 | 1 | Bacteria;Bacteroidetes;Flavobacteria;Flavobacteriales;unclassified;unclassified;                  |
| 1252 | 0 | 0 | 1 | Bacteria;Bacteroidetes;unclassified;unclassified;unclassified;unclassified;                       |
| 1253 | 0 | 1 | 0 | Bacteria;Proteobacteria;Gammaproteobacteria;unclassified;unclassified;unclassified;               |
| 1254 | 0 | 0 | 1 | Bacteria;Proteobacteria;Alphaproteobacteria;Rhodobacterales;Rhodobacteraceae;unclassified;        |
| 1255 | 0 | 1 | 0 | Bacteria;Proteobacteria;Deltaproteobacteria;unclassified;unclassified;unclassified;               |

|      |   |   |   |                                                                                                |
|------|---|---|---|------------------------------------------------------------------------------------------------|
| 1256 | 0 | 0 | 1 | Bacteria;Proteobacteria;Gammaproteobacteria;unclassified;unclassified;unclassified;            |
| 1257 | 0 | 0 | 1 | Bacteria;Proteobacteria;Alphaproteobacteria;unclassified;unclassified;unclassified;            |
| 1258 | 0 | 1 | 0 | Bacteria;Bacteroidetes;Sphingobacteria;Sphingobacteriales;unclassified;unclassified;           |
| 1259 | 0 | 0 | 1 | Bacteria;Firmicutes;unclassified;unclassified;unclassified;unclassified;                       |
| 1260 | 0 | 1 | 0 | Bacteria;Firmicutes;Clostridia;Clostridiales;Lachnospiraceae;unclassified;                     |
| 1261 | 0 | 1 | 0 | Bacteria;Proteobacteria;unclassified;unclassified;unclassified;unclassified;                   |
| 1262 | 0 | 0 | 1 | Bacteria;Proteobacteria;Gammaproteobacteria;unclassified;unclassified;unclassified;            |
| 1263 | 0 | 1 | 0 | Bacteria;Acidobacteria;Acidobacteria;Acidobacteriales;Acidobacteriaceae;Gp23                   |
| 1264 | 0 | 0 | 1 | Bacteria;Acidobacteria;Acidobacteria;Acidobacteriales;Acidobacteriaceae;Gp23                   |
| 1265 | 0 | 0 | 1 | Bacteria;Bacteroidetes;unclassified;unclassified;unclassified;unclassified;                    |
| 1266 | 0 | 0 | 1 | Bacteria;Bacteroidetes;unclassified;unclassified;unclassified;unclassified;                    |
| 1267 | 0 | 0 | 1 | Bacteria;Proteobacteria;Gammaproteobacteria;unclassified;unclassified;unclassified;            |
| 1268 | 0 | 0 | 1 | Bacteria;Bacteroidetes;Sphingobacteria;Sphingobacteriales;Saprospiraceae;Haliscomenobacter;    |
| 1269 | 0 | 0 | 1 | Bacteria;unclassified;unclassified;unclassified;unclassified;unclassified;                     |
| 1270 | 0 | 0 | 1 | Bacteria;Proteobacteria;Gammaproteobacteria;unclassified;unclassified;unclassified;            |
| 1271 | 0 | 0 | 1 | Bacteria;unclassified;unclassified;unclassified;unclassified;unclassified;                     |
| 1272 | 0 | 0 | 1 | Bacteria;Proteobacteria;Alphaproteobacteria;unclassified;unclassified;unclassified;            |
| 1273 | 0 | 0 | 1 | Bacteria;unclassified;unclassified;unclassified;unclassified;unclassified;                     |
| 1274 | 0 | 0 | 1 | Bacteria;Bacteroidetes;unclassified;unclassified;unclassified;unclassified;                    |
| 1275 | 0 | 0 | 1 | Bacteria;unclassified;unclassified;unclassified;unclassified;unclassified;                     |
| 1276 | 0 | 0 | 1 | Bacteria;Proteobacteria;Alphaproteobacteria;unclassified;unclassified;unclassified;            |
| 1277 | 0 | 1 | 0 | Bacteria;Firmicutes;unclassified;unclassified;unclassified;unclassified;                       |
| 1278 | 0 | 0 | 1 | Bacteria;Bacteroidetes;Flavobacteria;Flavobacteriales;Cryomorphaceae;Crocinitomix;             |
| 1279 | 0 | 0 | 1 | Bacteria;Proteobacteria;Alphaproteobacteria;unclassified;unclassified;unclassified;            |
| 1280 | 0 | 0 | 1 | Bacteria;Proteobacteria;Deltaproteobacteria;Desulfobacterales;Desulfobacteraceae;unclassified; |
| 1281 | 0 | 0 | 1 | Bacteria;Bacteroidetes;unclassified;unclassified;unclassified;unclassified;                    |
| 1282 | 0 | 0 | 1 | Bacteria;Proteobacteria;Gammaproteobacteria;Alteromonadales;Colwelliaceae;Colwellia;           |
| 1283 | 0 | 0 | 1 | Bacteria;Proteobacteria;Gammaproteobacteria;unclassified;unclassified;unclassified;            |
| 1284 | 0 | 0 | 1 | Bacteria;Proteobacteria;unclassified;unclassified;unclassified;unclassified;                   |
| 1285 | 0 | 0 | 1 | Bacteria;Bacteroidetes;unclassified;unclassified;unclassified;unclassified;                    |
| 1286 | 0 | 1 | 0 | Bacteria;Bacteroidetes;unclassified;unclassified;unclassified;unclassified;                    |
| 1287 | 0 | 0 | 1 | Bacteria;Actinobacteria;Actinobacteria;Actinomycetales;Brevibacteriaceae;Brevibacterium;       |
| 1288 | 0 | 0 | 1 | Bacteria;unclassified;unclassified;unclassified;unclassified;unclassified;                     |
| 1289 | 0 | 0 | 1 | Bacteria;Proteobacteria;Gammaproteobacteria;unclassified;unclassified;unclassified;            |
| 1290 | 0 | 1 | 0 | Bacteria;Proteobacteria;unclassified;unclassified;unclassified;unclassified;                   |
| 1291 | 0 | 0 | 1 | Bacteria;Proteobacteria;Deltaproteobacteria;Desulfobacterales;Desulfobacteraceae;unclassified; |
| 1292 | 0 | 1 | 0 | Bacteria;unclassified;unclassified;unclassified;unclassified;unclassified;                     |
| 1293 | 0 | 0 | 1 | Bacteria;Proteobacteria;Gammaproteobacteria;unclassified;unclassified;unclassified;            |
| 1294 | 0 | 1 | 0 | Bacteria;Proteobacteria;Alphaproteobacteria;Rhodobacteriales;Rhodobacteraceae;unclassified;    |
| 1295 | 0 | 1 | 0 | Bacteria;Fusobacteria;Fusobacteria;Fusobacteriales;Fusobacteriaceae;Fusobacterium;             |
| 1296 | 0 | 0 | 1 | Bacteria;Proteobacteria;Deltaproteobacteria;Myxococcales;unclassified;unclassified;            |
| 1297 | 0 | 0 | 1 | Bacteria;Proteobacteria;Gammaproteobacteria;unclassified;unclassified;unclassified;            |

|      |   |   |   |                                                                                                 |
|------|---|---|---|-------------------------------------------------------------------------------------------------|
| 1298 | 0 | 1 | 0 | Bacteria;unclassified;unclassified;unclassified;unclassified;unclassified;                      |
| 1299 | 0 | 0 | 1 | Bacteria;Proteobacteria;unclassified;unclassified;unclassified;unclassified;                    |
| 1300 | 0 | 1 | 0 | Bacteria;Bacteroidetes;unclassified;unclassified;unclassified;unclassified;                     |
| 1301 | 0 | 0 | 1 | Bacteria;unclassified;unclassified;unclassified;unclassified;unclassified;                      |
| 1302 | 0 | 1 | 0 | Bacteria;unclassified;unclassified;unclassified;unclassified;unclassified;                      |
| 1303 | 0 | 1 | 0 | Bacteria;Bacteroidetes;unclassified;unclassified;unclassified;unclassified;                     |
| 1304 | 0 | 1 | 0 | Bacteria;unclassified;unclassified;unclassified;unclassified;unclassified;                      |
| 1305 | 0 | 0 | 1 | Bacteria;unclassified;unclassified;unclassified;unclassified;unclassified;                      |
| 1306 | 0 | 0 | 1 | Bacteria;Proteobacteria;Zetaproteobacteria;Mariprofundales;Mariprofundaceae;Mariprofundus;      |
| 1307 | 0 | 0 | 1 | Bacteria;Proteobacteria;Gammaproteobacteria;unclassified;unclassified;unclassified;             |
| 1308 | 0 | 0 | 1 | Bacteria;Proteobacteria;Betaproteobacteria;unclassified;unclassified;unclassified;              |
| 1309 | 0 | 0 | 1 | Bacteria;Proteobacteria;Alphaproteobacteria;unclassified;unclassified;unclassified;             |
| 1310 | 0 | 0 | 1 | Bacteria;Proteobacteria;Alphaproteobacteria;Rhodobacterales;Rhodobacteraceae;unclassified;      |
| 1311 | 0 | 1 | 0 | Bacteria;Proteobacteria;unclassified;unclassified;unclassified;unclassified;                    |
| 1312 | 0 | 0 | 1 | Bacteria;Proteobacteria;Gammaproteobacteria;unclassified;unclassified;unclassified;             |
| 1313 | 0 | 0 | 1 | Bacteria;Bacteroidetes;unclassified;unclassified;unclassified;unclassified;                     |
| 1314 | 0 | 0 | 1 | Bacteria;Proteobacteria;Gammaproteobacteria;unclassified;unclassified;unclassified;             |
| 1315 | 0 | 0 | 1 | Bacteria;Acidobacteria;Acidobacteria;Acidobacteriales;Acidobacteriaceae;Gp23                    |
| 1316 | 0 | 0 | 1 | Bacteria;Chloroflexi;unclassified;unclassified;unclassified;unclassified;                       |
| 1317 | 0 | 0 | 1 | Bacteria;Bacteroidetes;unclassified;unclassified;unclassified;unclassified;                     |
| 1318 | 0 | 0 | 1 | Bacteria;unclassified;unclassified;unclassified;unclassified;unclassified;                      |
| 1319 | 0 | 1 | 0 | Bacteria;Proteobacteria;Deltaproteobacteria;unclassified;unclassified;unclassified;             |
| 1320 | 0 | 0 | 1 | Bacteria;unclassified;unclassified;unclassified;unclassified;unclassified;                      |
| 1321 | 0 | 1 | 0 | Bacteria;Proteobacteria;Gammaproteobacteria;unclassified;unclassified;unclassified;             |
| 1322 | 0 | 0 | 1 | Bacteria;unclassified;unclassified;unclassified;unclassified;unclassified;                      |
| 1323 | 0 | 0 | 1 | Bacteria;Bacteroidetes;unclassified;unclassified;unclassified;unclassified;                     |
| 1324 | 0 | 0 | 1 | Bacteria;Proteobacteria;Gammaproteobacteria;unclassified;unclassified;unclassified;             |
| 1325 | 0 | 1 | 0 | Bacteria;Bacteroidetes;Sphingobacteria;Sphingobacteriales;Flammeovirgaceae;unclassified;        |
| 1326 | 0 | 1 | 0 | Bacteria;unclassified;unclassified;unclassified;unclassified;unclassified;                      |
| 1327 | 0 | 0 | 1 | Bacteria;unclassified;unclassified;unclassified;unclassified;unclassified;                      |
| 1328 | 0 | 1 | 0 | Bacteria;Proteobacteria;Gammaproteobacteria;unclassified;unclassified;unclassified;             |
| 1329 | 0 | 0 | 1 | Bacteria;Proteobacteria;Gammaproteobacteria;Alteromonadales;Idiomarinaceae;Idiomarina;          |
| 1330 | 0 | 0 | 1 | Bacteria;unclassified;unclassified;unclassified;unclassified;unclassified;                      |
| 1331 | 0 | 1 | 0 | Bacteria;Bacteroidetes;unclassified;unclassified;unclassified;unclassified;                     |
| 1332 | 0 | 0 | 1 | Bacteria;Spirochaetes;Spirochaetes;Spirochaetales;Spirochaetaceae;Spirochaeta;                  |
| 1333 | 0 | 1 | 0 | Bacteria;Proteobacteria;unclassified;unclassified;unclassified;unclassified;                    |
| 1334 | 0 | 0 | 1 | Bacteria;unclassified;unclassified;unclassified;unclassified;unclassified;                      |
| 1335 | 0 | 0 | 1 | Bacteria;Acidobacteria;Acidobacteria;Acidobacteriales;Acidobacteriaceae;Gp22                    |
| 1336 | 0 | 0 | 1 | Bacteria;Proteobacteria;Gammaproteobacteria;Oceanospirillales;Alcanivoracaceae;Marinicella;     |
| 1337 | 0 | 0 | 1 | Bacteria;Proteobacteria;Deltaproteobacteria;Desulfobacteriales;Desulfobacteraceae;unclassified; |
| 1338 | 0 | 1 | 0 | Bacteria;unclassified;unclassified;unclassified;unclassified;unclassified;                      |
| 1339 | 0 | 0 | 1 | Bacteria;Proteobacteria;Deltaproteobacteria;Desulfobacteriales;Desulfobacteraceae;unclassified; |

|      |   |   |   |                                                                                                     |
|------|---|---|---|-----------------------------------------------------------------------------------------------------|
| 1340 | 0 | 1 | 0 | Bacteria;Proteobacteria;Gammaproteobacteria;unclassified;unclassified;unclassified;                 |
| 1341 | 0 | 0 | 1 | Bacteria;Proteobacteria;Alphaproteobacteria;unclassified;unclassified;unclassified;                 |
| 1342 | 0 | 0 | 1 | Bacteria;unclassified;unclassified;unclassified;unclassified;unclassified;                          |
| 1343 | 0 | 0 | 1 | Bacteria;Proteobacteria;Alphaproteobacteria;Rhodobacterales;Rhodobacteraceae;Roseovarius;           |
| 1344 | 0 | 0 | 1 | Bacteria;Proteobacteria;unclassified;unclassified;unclassified;unclassified;                        |
| 1345 | 0 | 1 | 0 | Bacteria;Bacteroidetes;unclassified;unclassified;unclassified;unclassified;                         |
| 1346 | 0 | 0 | 1 | Bacteria;WS3;unclassified;unclassified;unclassified;unclassified;                                   |
| 1347 | 0 | 0 | 1 | Bacteria;Bacteroidetes;unclassified;unclassified;unclassified;unclassified;                         |
| 1348 | 0 | 0 | 1 | Bacteria;Proteobacteria;Gammaproteobacteria;unclassified;unclassified;unclassified;                 |
| 1349 | 0 | 1 | 0 | Bacteria;Bacteroidetes;unclassified;unclassified;unclassified;unclassified;                         |
| 1350 | 0 | 0 | 1 | Bacteria;Actinobacteria;Actinobacteria;unclassified;unclassified;unclassified;                      |
| 1351 | 0 | 0 | 1 | Bacteria;Proteobacteria;Gammaproteobacteria;unclassified;unclassified;unclassified;                 |
| 1352 | 0 | 0 | 1 | Bacteria;Proteobacteria;unclassified;unclassified;unclassified;unclassified;                        |
| 1353 | 0 | 1 | 0 | Bacteria;Proteobacteria;Alphaproteobacteria;Rhizobiales;Aurantimonadaceae;Fulvimarina;              |
| 1354 | 0 | 1 | 0 | Bacteria;Proteobacteria;Gammaproteobacteria;unclassified;unclassified;unclassified;                 |
| 1355 | 0 | 0 | 1 | Bacteria;Proteobacteria;Gammaproteobacteria;unclassified;unclassified;unclassified;                 |
| 1356 | 0 | 1 | 0 | Bacteria;Verrucomicrobia;Verrucomicrobiae;Verrucomicrobiales;unclassified;unclassified;             |
| 1357 | 0 | 1 | 0 | Bacteria;TM7;unclassified;unclassified;unclassified;unclassified;                                   |
| 1358 | 0 | 0 | 1 | Bacteria;Verrucomicrobia;Opitutae;Puniceococcales;Puniceococcaceae;unclassified;                    |
| 1359 | 0 | 1 | 0 | Bacteria;unclassified;unclassified;unclassified;unclassified;unclassified;                          |
| 1360 | 0 | 0 | 1 | Bacteria;Proteobacteria;Gammaproteobacteria;Salinisphaerales;Salinisphaeraceae;Salinisphaera;       |
| 1361 | 0 | 1 | 0 | Bacteria;Bacteroidetes;Flavobacteria;Flavobacteriales;Cryomorphaceae;Owenweeksia;                   |
| 1362 | 0 | 0 | 1 | Bacteria;Proteobacteria;Gammaproteobacteria;unclassified;unclassified;unclassified;                 |
| 1363 | 0 | 0 | 1 | Bacteria;Acidobacteria;Acidobacteria;Acidobacteriales;Acidobacteriaceae;Gp22                        |
| 1364 | 0 | 0 | 1 | Bacteria;Bacteroidetes;Sphingobacteria;Sphingobacteriales;unclassified;unclassified;                |
| 1365 | 0 | 0 | 1 | Bacteria;Proteobacteria;Gammaproteobacteria;unclassified;unclassified;unclassified;                 |
| 1366 | 0 | 0 | 1 | Bacteria;Proteobacteria;unclassified;unclassified;unclassified;unclassified;                        |
| 1367 | 0 | 0 | 1 | Bacteria;Bacteroidetes;unclassified;unclassified;unclassified;unclassified;                         |
| 1368 | 0 | 1 | 0 | Bacteria;Bacteroidetes;Flavobacteria;Flavobacteriales;Cryomorphaceae;unclassified;                  |
| 1369 | 0 | 0 | 1 | Bacteria;unclassified;unclassified;unclassified;unclassified;unclassified;                          |
| 1370 | 0 | 0 | 1 | Bacteria;Proteobacteria;Gammaproteobacteria;unclassified;unclassified;unclassified;                 |
| 1371 | 0 | 0 | 1 | Bacteria;Proteobacteria;Gammaproteobacteria;Thiotrichales;Thiotrichaceae;Cocleimonas;               |
| 1372 | 0 | 1 | 0 | Bacteria;unclassified;unclassified;unclassified;unclassified;unclassified;                          |
| 1373 | 0 | 1 | 0 | Bacteria;Bacteroidetes;Sphingobacteria;Sphingobacteriales;unclassified;unclassified;                |
| 1374 | 0 | 0 | 1 | Bacteria;Proteobacteria;Deltaproteobacteria;Desulfobacteriales;Desulfobacteraceae;unclassified;     |
| 1375 | 0 | 1 | 0 | Bacteria;Proteobacteria;Deltaproteobacteria;Desulfobacteriales;Desulfobacteraceae;Desulfobacterium; |
| 1376 | 0 | 1 | 0 | Bacteria;Proteobacteria;Deltaproteobacteria;Desulfobacteriales;Desulfobacteraceae;unclassified;     |
| 1377 | 0 | 1 | 0 | Bacteria;Proteobacteria;Gammaproteobacteria;unclassified;unclassified;unclassified;                 |
| 1378 | 0 | 0 | 1 | Bacteria;unclassified;unclassified;unclassified;unclassified;unclassified;                          |
| 1379 | 0 | 1 | 0 | Bacteria;Bacteroidetes;unclassified;unclassified;unclassified;unclassified;                         |
| 1380 | 0 | 0 | 1 | Bacteria;Proteobacteria;Deltaproteobacteria;Bdellovibrionales;Bacteriovoracaceae;Bacteriovorax;     |
| 1381 | 0 | 0 | 1 | Bacteria;Proteobacteria;Gammaproteobacteria;unclassified;unclassified;unclassified;                 |

|      |   |   |   |                                                                                                   |
|------|---|---|---|---------------------------------------------------------------------------------------------------|
| 1382 | 0 | 1 | 0 | Bacteria;unclassified;unclassified;unclassified;unclassified;unclassified;                        |
| 1383 | 0 | 0 | 1 | Bacteria;Proteobacteria;Gammaproteobacteria;unclassified;unclassified;unclassified;               |
| 1384 | 0 | 1 | 0 | Bacteria;Firmicutes;Clostridia;Clostridiales;unclassified;unclassified;                           |
| 1385 | 0 | 1 | 0 | Bacteria;Bacteroidetes;unclassified;unclassified;unclassified;unclassified;                       |
| 1386 | 0 | 0 | 1 | Bacteria;Proteobacteria;Gammaproteobacteria;Alteromonadales;Alteromonadaceae;Haliea;              |
| 1387 | 0 | 0 | 1 | Bacteria;Proteobacteria;Deltaproteobacteria;Myxococcales;unclassified;unclassified;               |
| 1388 | 0 | 0 | 1 | Bacteria;Proteobacteria;Alphaproteobacteria;Rhodobacterales;Rhodobacteraceae;unclassified;        |
| 1389 | 0 | 0 | 1 | Bacteria;Bacteroidetes;unclassified;unclassified;unclassified;unclassified;                       |
| 1390 | 0 | 1 | 0 | Bacteria;Bacteroidetes;unclassified;unclassified;unclassified;unclassified;                       |
| 1391 | 0 | 0 | 1 | Bacteria;Bacteroidetes;unclassified;unclassified;unclassified;unclassified;                       |
| 1392 | 0 | 0 | 1 | Bacteria;Proteobacteria;Gammaproteobacteria;Alteromonadales;unclassified;unclassified;            |
| 1393 | 0 | 1 | 0 | Bacteria;Proteobacteria;Gammaproteobacteria;unclassified;unclassified;unclassified;               |
| 1394 | 0 | 1 | 0 | Bacteria;unclassified;unclassified;unclassified;unclassified;unclassified;                        |
| 1395 | 0 | 0 | 1 | Bacteria;Proteobacteria;Alphaproteobacteria;unclassified;unclassified;unclassified;               |
| 1396 | 0 | 0 | 1 | Bacteria;Acidobacteria;Acidobacteria;Acidobacteriales;Acidobacteriaceae;Gp10                      |
| 1397 | 0 | 1 | 0 | Bacteria;Proteobacteria;Alphaproteobacteria;Rhodobacterales;Rhodobacteraceae;unclassified;        |
| 1398 | 0 | 0 | 1 | Bacteria;Acidobacteria;Acidobacteria;Acidobacteriales;Acidobacteriaceae;Gp10                      |
| 1399 | 0 | 1 | 0 | Bacteria;Proteobacteria;Gammaproteobacteria;unclassified;unclassified;unclassified;               |
| 1400 | 0 | 0 | 1 | Bacteria;Proteobacteria;unclassified;unclassified;unclassified;unclassified;                      |
| 1401 | 0 | 0 | 1 | Bacteria;unclassified;unclassified;unclassified;unclassified;unclassified;                        |
| 1402 | 0 | 1 | 0 | Bacteria;unclassified;unclassified;unclassified;unclassified;unclassified;                        |
| 1403 | 0 | 1 | 0 | Bacteria;TM7;unclassified;unclassified;unclassified;unclassified;                                 |
| 1404 | 0 | 1 | 0 | Bacteria;Proteobacteria;Deltaproteobacteria;Desulfuromonadales;Desulfuromonadaceae;unclassified;  |
| 1405 | 0 | 0 | 1 | Bacteria;Bacteroidetes;Flavobacteria;Flavobacteriales;Flavobacteriaceae;unclassified;             |
| 1406 | 0 | 0 | 1 | Bacteria;Proteobacteria;Epsilonproteobacteria;Campylobacteriales;Campylobacteraceae;unclassified; |
| 1407 | 0 | 1 | 0 | Bacteria;Proteobacteria;Deltaproteobacteria;Desulfobacteriales;Desulfobulbaceae;Desulfobulbus;    |
| 1408 | 0 | 0 | 1 | Bacteria;Bacteroidetes;unclassified;unclassified;unclassified;unclassified;                       |
| 1409 | 0 | 1 | 0 | Bacteria;Proteobacteria;Alphaproteobacteria;unclassified;unclassified;unclassified;               |
| 1410 | 0 | 1 | 0 | Bacteria;Firmicutes;Clostridia;Clostridiales;Incertae_Sedis_XI;Dethiosulfatibacter;               |
| 1411 | 0 | 0 | 1 | Bacteria;Proteobacteria;Gammaproteobacteria;unclassified;unclassified;unclassified;               |
| 1412 | 0 | 0 | 1 | Bacteria;unclassified;unclassified;unclassified;unclassified;unclassified;                        |
| 1413 | 0 | 1 | 0 | Bacteria;Proteobacteria;Deltaproteobacteria;Desulfovibrionales;Desulfovibrionaceae;unclassified;  |
| 1414 | 0 | 1 | 0 | Bacteria;Firmicutes;Clostridia;Clostridiales;Lachnospiraceae;unclassified;                        |
| 1415 | 0 | 1 | 0 | Bacteria;Bacteroidetes;Bacteroidia;Marinilabiliales;Marinifilaceae;Marinifilum;                   |
| 1416 | 0 | 1 | 0 | Bacteria;Proteobacteria;Deltaproteobacteria;Desulfuromonadales;Geobacteraceae;unclassified;       |
| 1417 | 0 | 0 | 1 | Bacteria;Proteobacteria;unclassified;unclassified;unclassified;unclassified;                      |
| 1418 | 0 | 1 | 0 | Bacteria;Proteobacteria;Deltaproteobacteria;Desulfobacteriales;Desulfobacteraceae;Desulfosarcina; |
| 1419 | 0 | 0 | 1 | Bacteria;Bacteroidetes;unclassified;unclassified;unclassified;unclassified;                       |
| 1420 | 0 | 0 | 1 | Bacteria;Proteobacteria;Alphaproteobacteria;Kordiimonadales;Kordiimonadaceae;Kordiimonas;         |
| 1421 | 0 | 0 | 1 | Bacteria;Proteobacteria;Alphaproteobacteria;Rhodobacterales;Rhodobacteraceae;unclassified;        |
| 1422 | 0 | 1 | 0 | Bacteria;Firmicutes;Clostridia;Clostridiales;unclassified;unclassified;                           |
| 1423 | 0 | 0 | 1 | Bacteria;Proteobacteria;Deltaproteobacteria;unclassified;unclassified;unclassified;               |

|      |   |   |   |                                                                                                |
|------|---|---|---|------------------------------------------------------------------------------------------------|
| 1424 | 0 | 1 | 0 | Bacteria;unclassified;unclassified;unclassified;unclassified;unclassified;                     |
| 1425 | 0 | 1 | 0 | Bacteria;unclassified;unclassified;unclassified;unclassified;unclassified;                     |
| 1426 | 0 | 0 | 1 | Bacteria;Proteobacteria;Deltaproteobacteria;unclassified;unclassified;unclassified;            |
| 1427 | 0 | 1 | 0 | Bacteria;Proteobacteria;Gammaproteobacteria;Thiotrichales;Thiotrichaceae;Cocleimonas;          |
| 1428 | 0 | 0 | 1 | Bacteria;unclassified;unclassified;unclassified;unclassified;unclassified;                     |
| 1429 | 0 | 0 | 1 | Bacteria;Proteobacteria;Deltaproteobacteria;Desulfobacterales;Desulfobulbaceae;unclassified;   |
| 1430 | 0 | 0 | 1 | Bacteria;Firmicutes;Clostridia;Clostridiales;unclassified;unclassified;                        |
| 1431 | 0 | 0 | 1 | Bacteria;Bacteroidetes;Flavobacteria;Flavobacteriales;Flavobacteriaceae;unclassified;          |
| 1432 | 0 | 0 | 1 | Bacteria;unclassified;unclassified;unclassified;unclassified;unclassified;                     |
| 1433 | 0 | 1 | 0 | Bacteria;WS3;unclassified;unclassified;unclassified;unclassified;                              |
| 1434 | 0 | 1 | 0 | Bacteria;Bacteroidetes;unclassified;unclassified;unclassified;unclassified;                    |
| 1435 | 0 | 0 | 1 | Bacteria;Proteobacteria;Epsilonproteobacteria;Campylobacterales;Campylobacteraceae;Arcobacter; |
| 1436 | 0 | 1 | 0 | Bacteria;Bacteroidetes;Flavobacteria;Flavobacteriales;Flavobacteriaceae;Kordia;                |
| 1437 | 0 | 1 | 0 | Bacteria;Proteobacteria;Alphaproteobacteria;Rhodobacterales;Rhodobacteraceae;unclassified;     |
| 1438 | 0 | 0 | 1 | Bacteria;Proteobacteria;Alphaproteobacteria;Caulobacterales;Hyphomonadaceae;Hyphomonas;        |
| 1439 | 0 | 1 | 0 | Bacteria;Proteobacteria;Deltaproteobacteria;unclassified;unclassified;unclassified;            |
| 1440 | 0 | 0 | 1 | Bacteria;Proteobacteria;Alphaproteobacteria;unclassified;unclassified;unclassified;            |
| 1441 | 0 | 0 | 1 | Bacteria;Actinobacteria;Actinobacteria;unclassified;unclassified;unclassified;                 |
| 1442 | 0 | 1 | 0 | Bacteria;Proteobacteria;Gammaproteobacteria;unclassified;unclassified;unclassified;            |
| 1443 | 0 | 1 | 0 | Bacteria;Proteobacteria;Gammaproteobacteria;unclassified;unclassified;unclassified;            |
| 1444 | 0 | 0 | 1 | Bacteria;unclassified;unclassified;unclassified;unclassified;unclassified;                     |
| 1445 | 0 | 0 | 1 | Bacteria;Bacteroidetes;unclassified;unclassified;unclassified;unclassified;                    |
| 1446 | 0 | 0 | 1 | Bacteria;Proteobacteria;Gammaproteobacteria;unclassified;unclassified;unclassified;            |
| 1447 | 0 | 1 | 0 | Bacteria;Proteobacteria;Alphaproteobacteria;Rhodobacterales;Rhodobacteraceae;unclassified;     |
| 1448 | 0 | 0 | 1 | Bacteria;Proteobacteria;unclassified;unclassified;unclassified;unclassified;                   |
| 1449 | 0 | 0 | 1 | Bacteria;unclassified;unclassified;unclassified;unclassified;unclassified;                     |
| 1450 | 0 | 1 | 0 | Bacteria;Firmicutes;Bacilli;Bacillales;unclassified;unclassified;                              |
| 1451 | 0 | 0 | 1 | Bacteria;Proteobacteria;Gammaproteobacteria;Alteromonadales;unclassified;unclassified;         |
| 1452 | 0 | 0 | 1 | Bacteria;Proteobacteria;Gammaproteobacteria;unclassified;unclassified;unclassified;            |
| 1453 | 0 | 1 | 0 | Bacteria;unclassified;unclassified;unclassified;unclassified;unclassified;                     |
| 1454 | 0 | 0 | 1 | Bacteria;unclassified;unclassified;unclassified;unclassified;unclassified;                     |
| 1455 | 0 | 0 | 1 | Bacteria;Proteobacteria;Epsilonproteobacteria;Campylobacterales;unclassified;unclassified;     |
| 1456 | 0 | 1 | 0 | Bacteria;Proteobacteria;Alphaproteobacteria;Rhodobacterales;Rhodobacteraceae;unclassified;     |
| 1457 | 0 | 1 | 0 | Bacteria;Acidobacteria;Acidobacteria;Acidobacteriales;Acidobacteriaceae;Gp10                   |
| 1458 | 0 | 0 | 1 | Bacteria;Proteobacteria;unclassified;unclassified;unclassified;unclassified;                   |
| 1459 | 0 | 0 | 1 | Bacteria;Bacteroidetes;Bacteroidia;Bacteroidales;Marinifilaceae;Marinifilum;                   |
| 1460 | 0 | 0 | 1 | Bacteria;Proteobacteria;Deltaproteobacteria;Myxococcales;Kofleriaceae;Kofleria;                |
| 1461 | 0 | 0 | 1 | Bacteria;Proteobacteria;Deltaproteobacteria;Myxococcales;Polyangiaceae;unclassified;           |
| 1462 | 0 | 0 | 1 | Bacteria;unclassified;unclassified;unclassified;unclassified;unclassified;                     |
| 1463 | 0 | 0 | 1 | Bacteria;unclassified;unclassified;unclassified;unclassified;unclassified;                     |
| 1464 | 0 | 1 | 0 | Bacteria;unclassified;unclassified;unclassified;unclassified;unclassified;                     |
| 1465 | 0 | 0 | 1 | Bacteria;Proteobacteria;Alphaproteobacteria;unclassified;unclassified;unclassified;            |

|              |             |             |             |                                                                                           |
|--------------|-------------|-------------|-------------|-------------------------------------------------------------------------------------------|
| 1466         | 0           | 0           | 1           | Bacteria;Proteobacteria;Gammaproteobacteria;Pseudomonadales;Pseudomonadaceae;Pseudomonas; |
| 1467         | 0           | 0           | 1           | Bacteria;unclassified;unclassified;unclassified;unclassified;unclassified;                |
| <b>Total</b> | <b>4344</b> | <b>3120</b> | <b>2844</b> |                                                                                           |
